# Supplementary material for: Synthesis, Antimicrobial Studies, and Molecular Docking Simulation of Novel Pyran, Pyrazole, and Pyranopyrazole Derivatives
Source: Hindawi journal article supplement (doi:10.1155/2023/6623445), 2023-12-07
Supplement: f1 [file 6623445.f1.zip]

Archive with 2 entries (2 files):
- magnification of compound 4h.docx
- Supporting Data - new - 17-8.docx
