# Supplementary figures and images for: Synthesis, Antimicrobial Studies, and Molecular Docking Simulation of Novel Pyran, Pyrazole, and Pyranopyrazole Derivatives
Source: Hindawi journal article supplement (doi:10.1155/2023/6623445), 2023-12-07

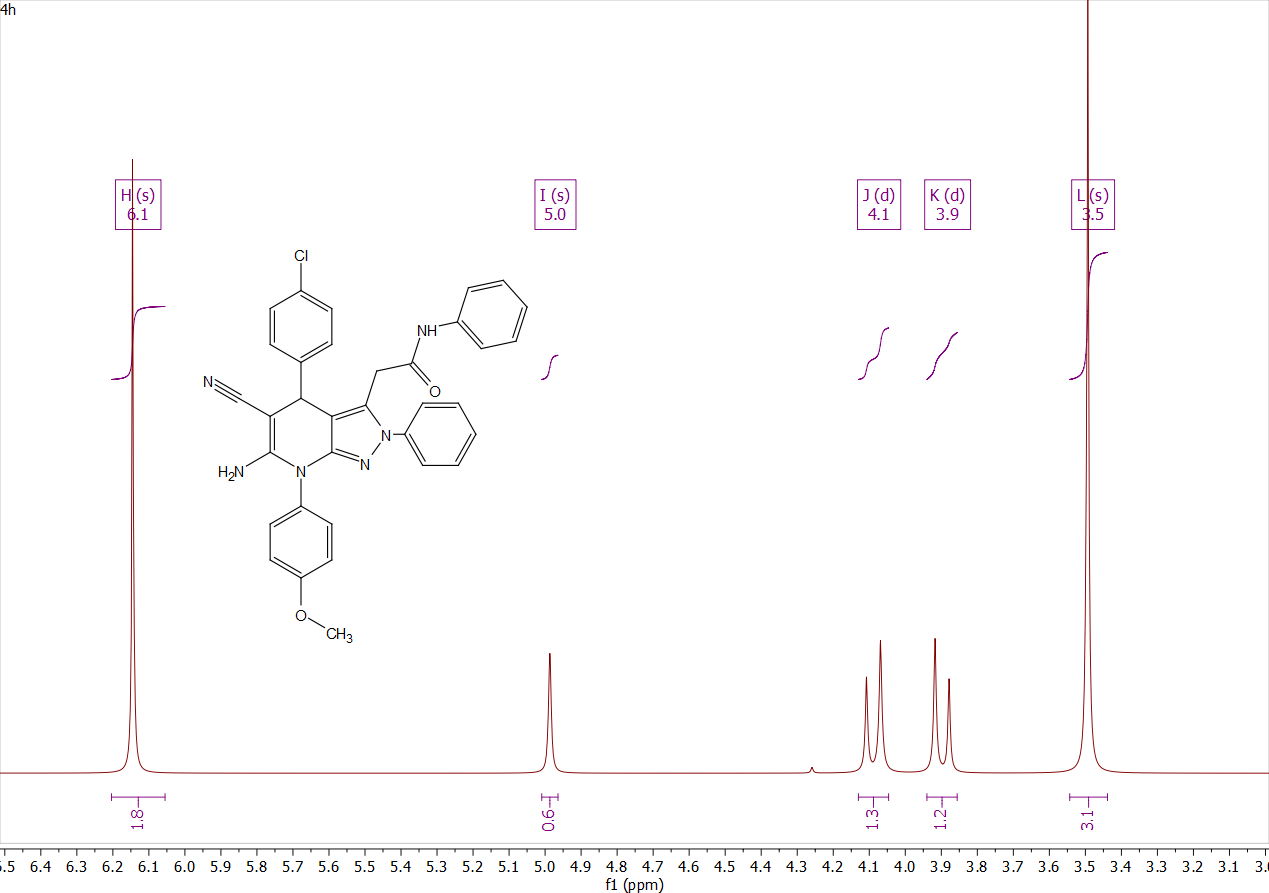

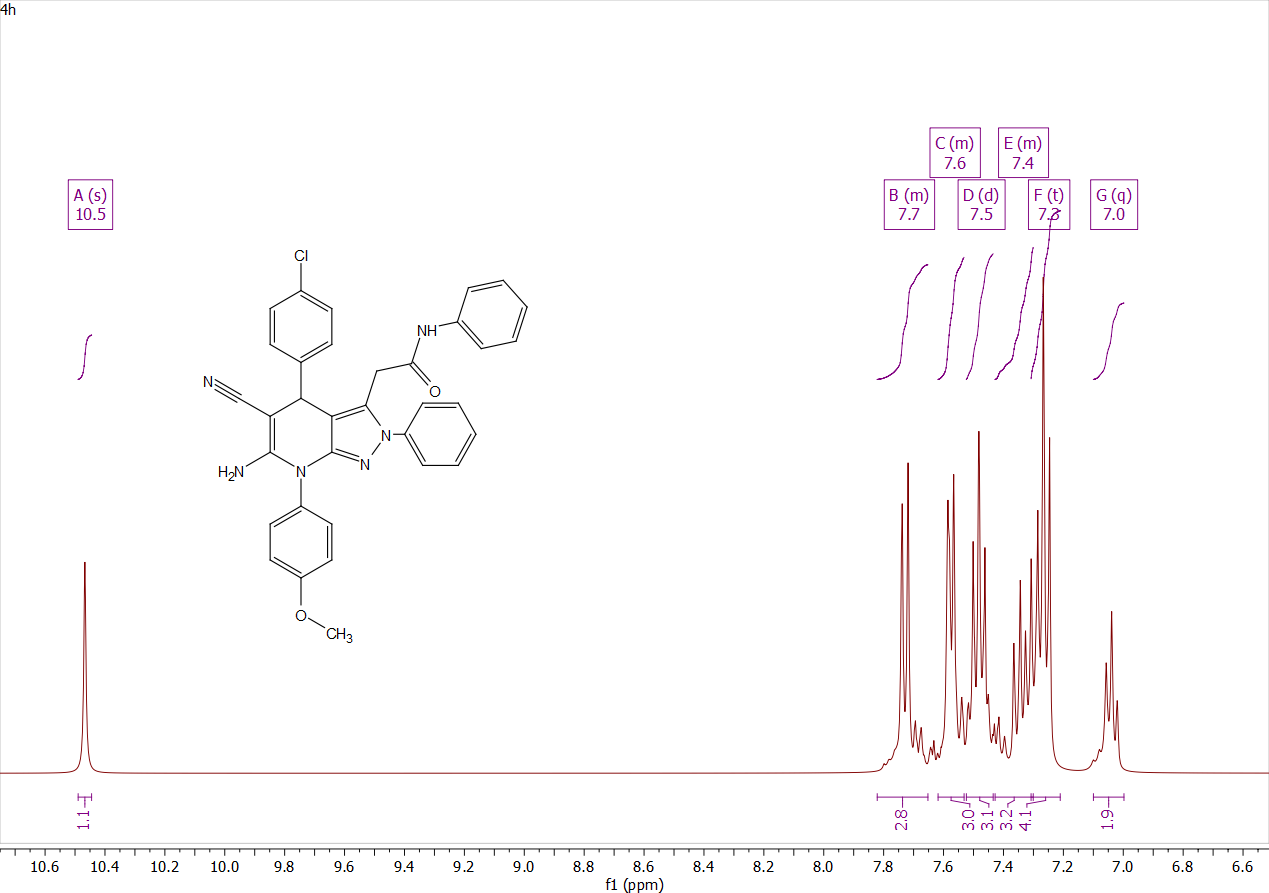


**4h**

**4h**

Supplement: f1 [file 6623445.f1.zip › magnification of compound 4h.docx]

**Supplementary file**


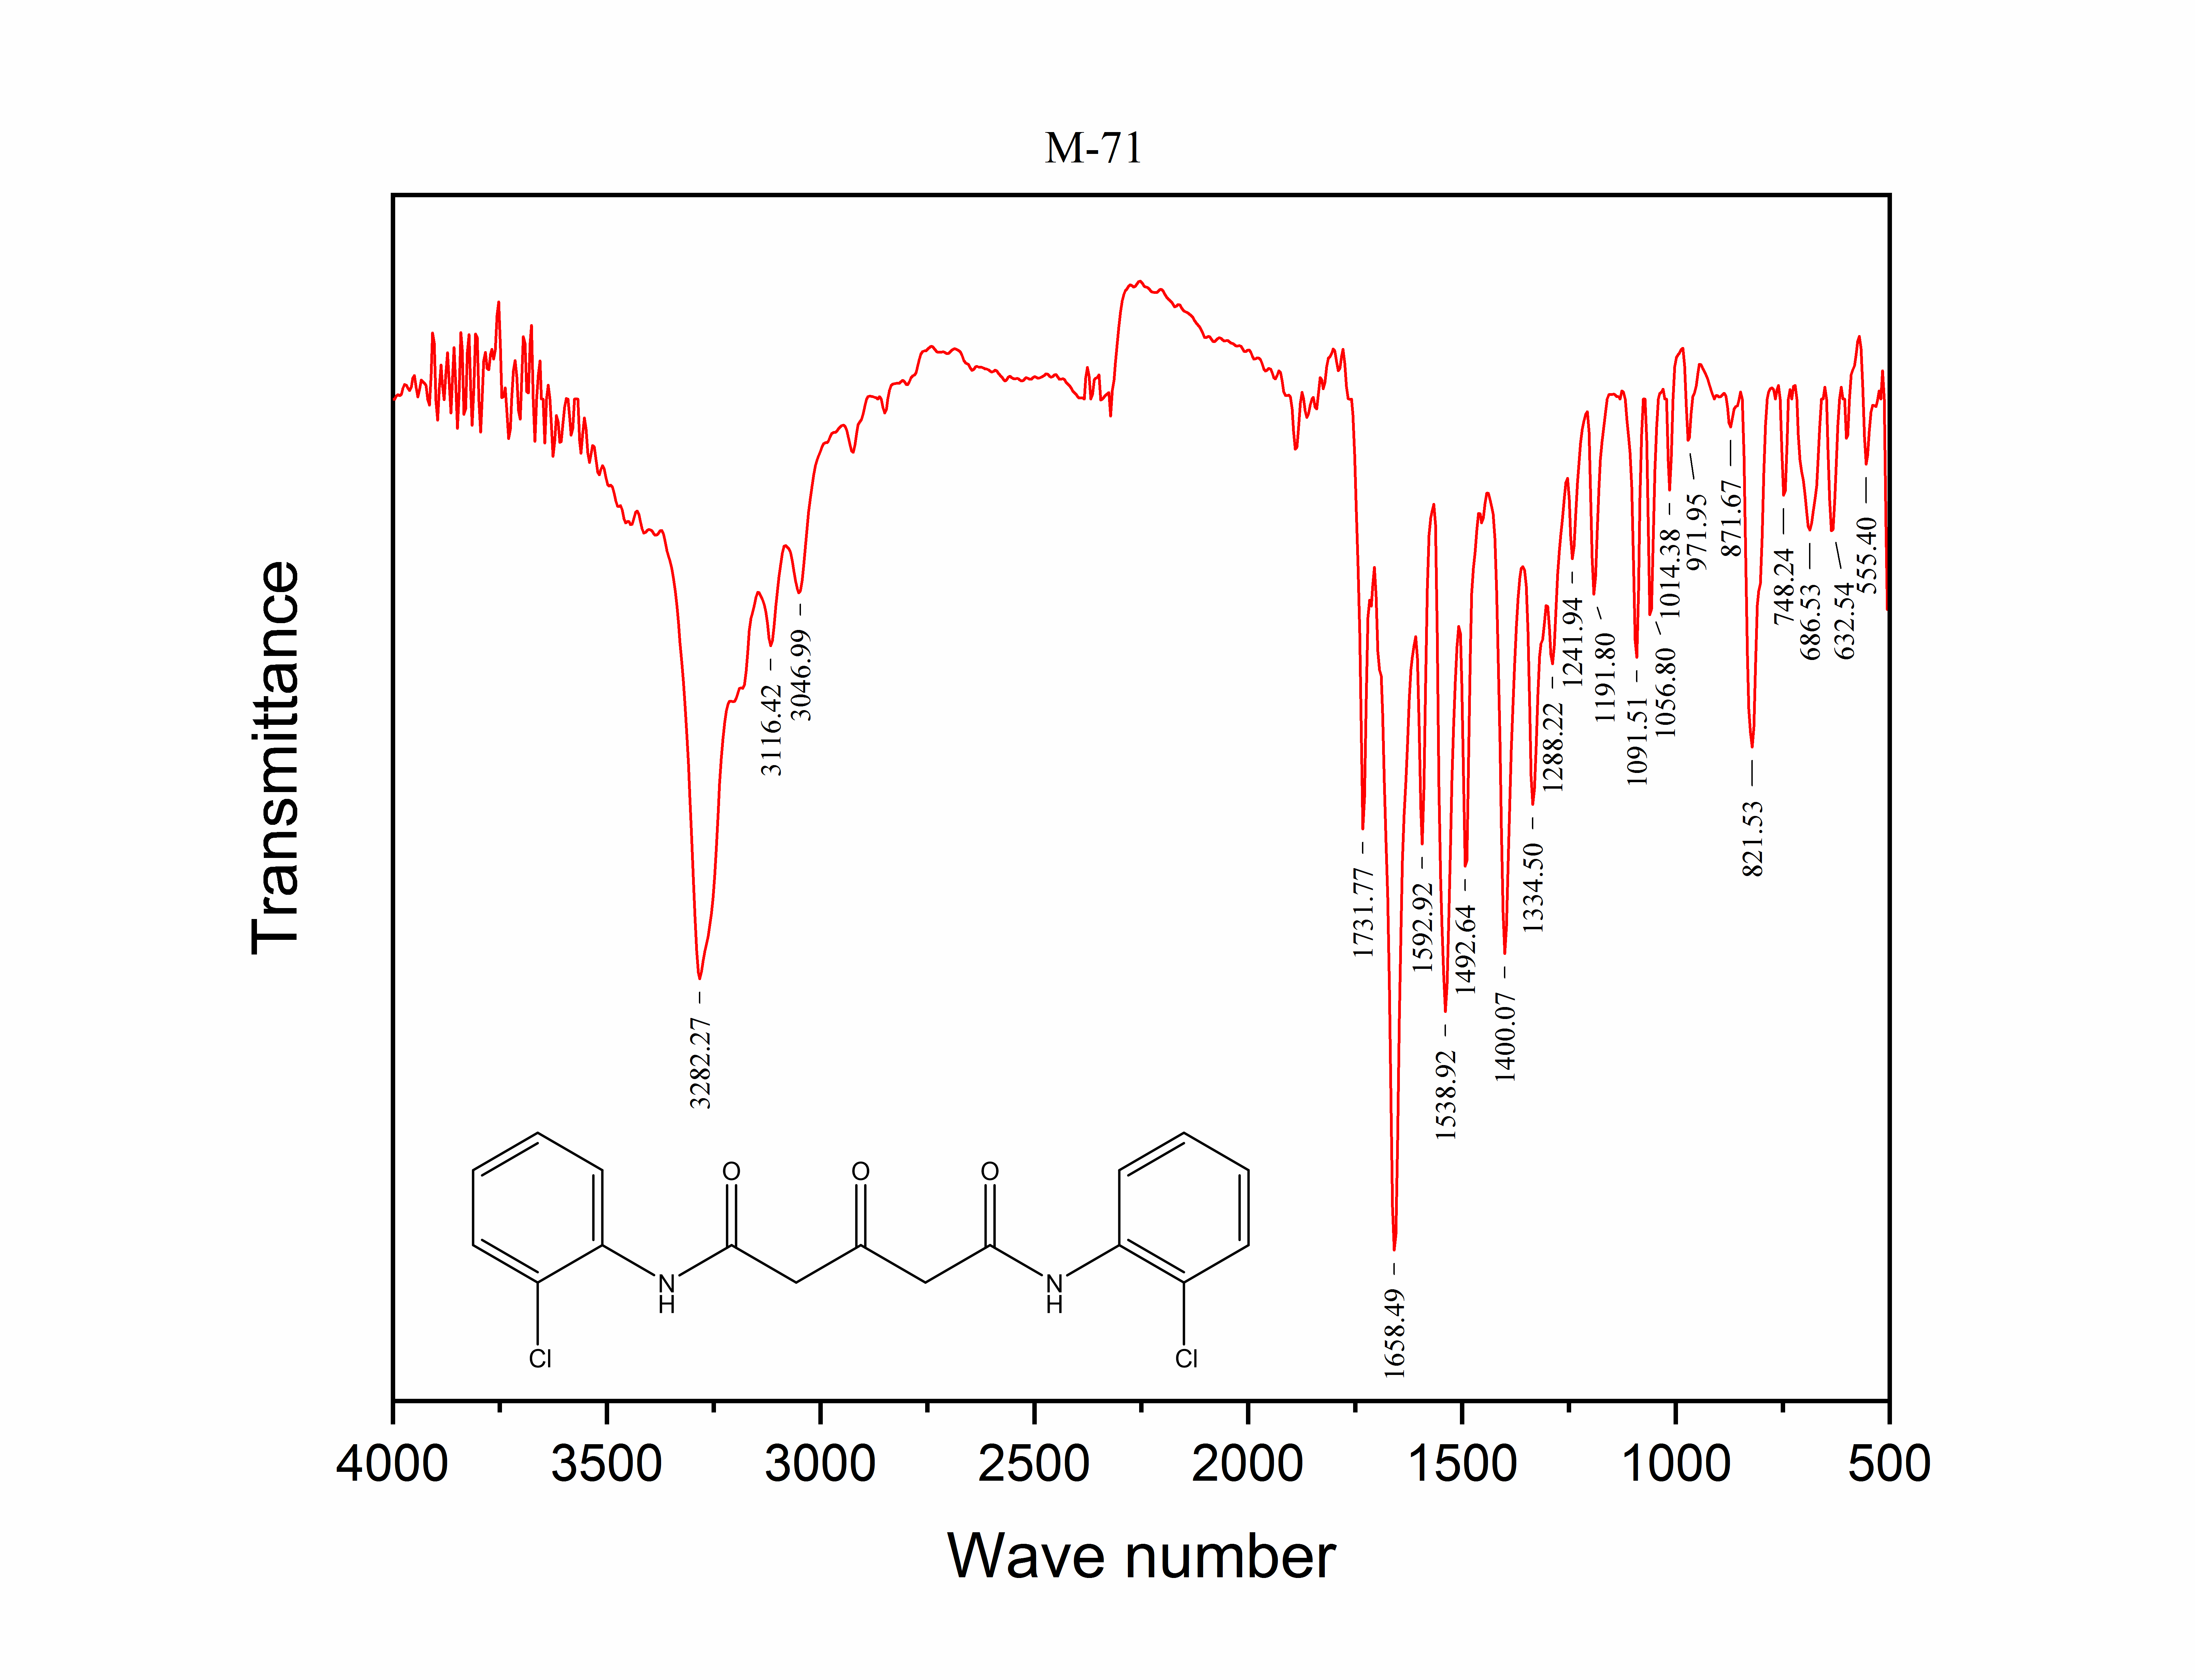


**1b**


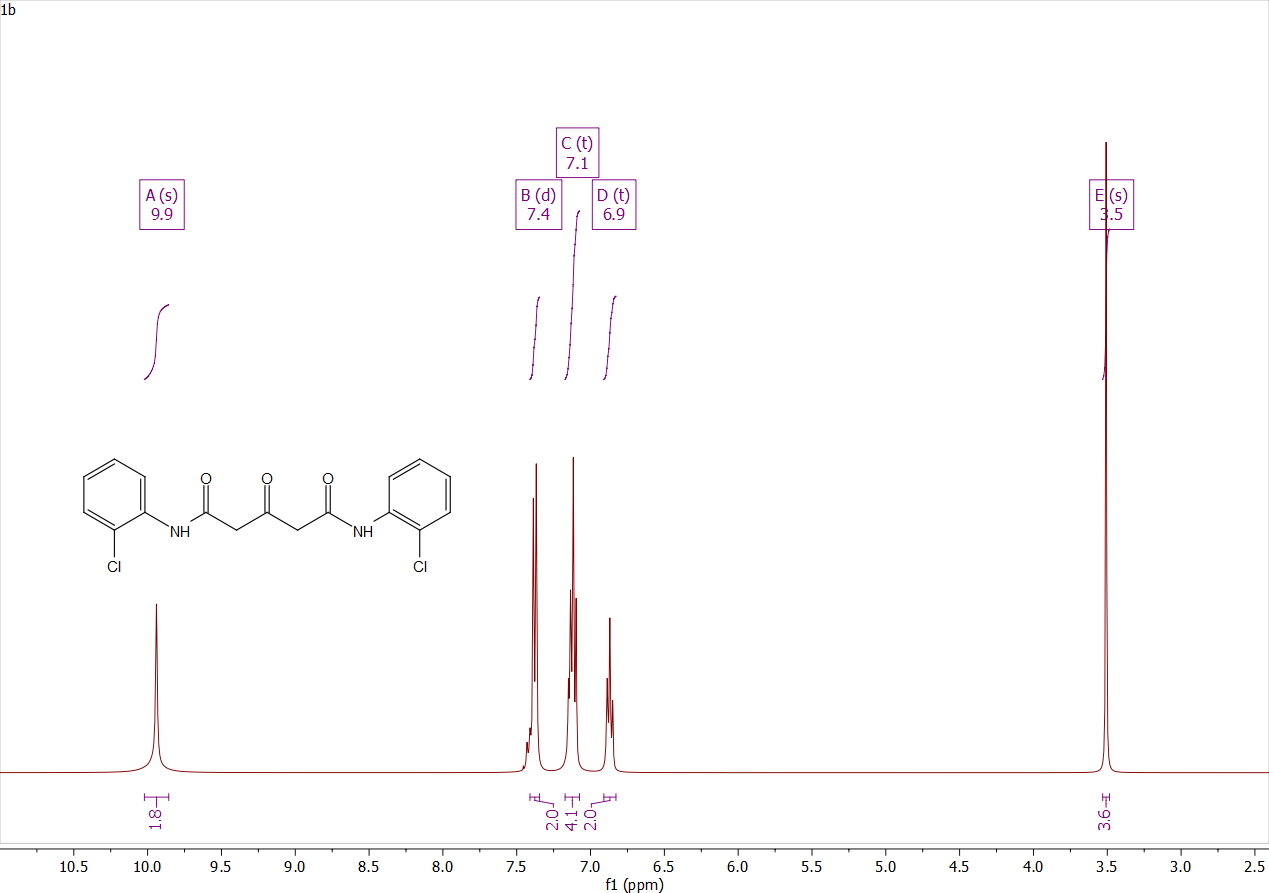


**1b**


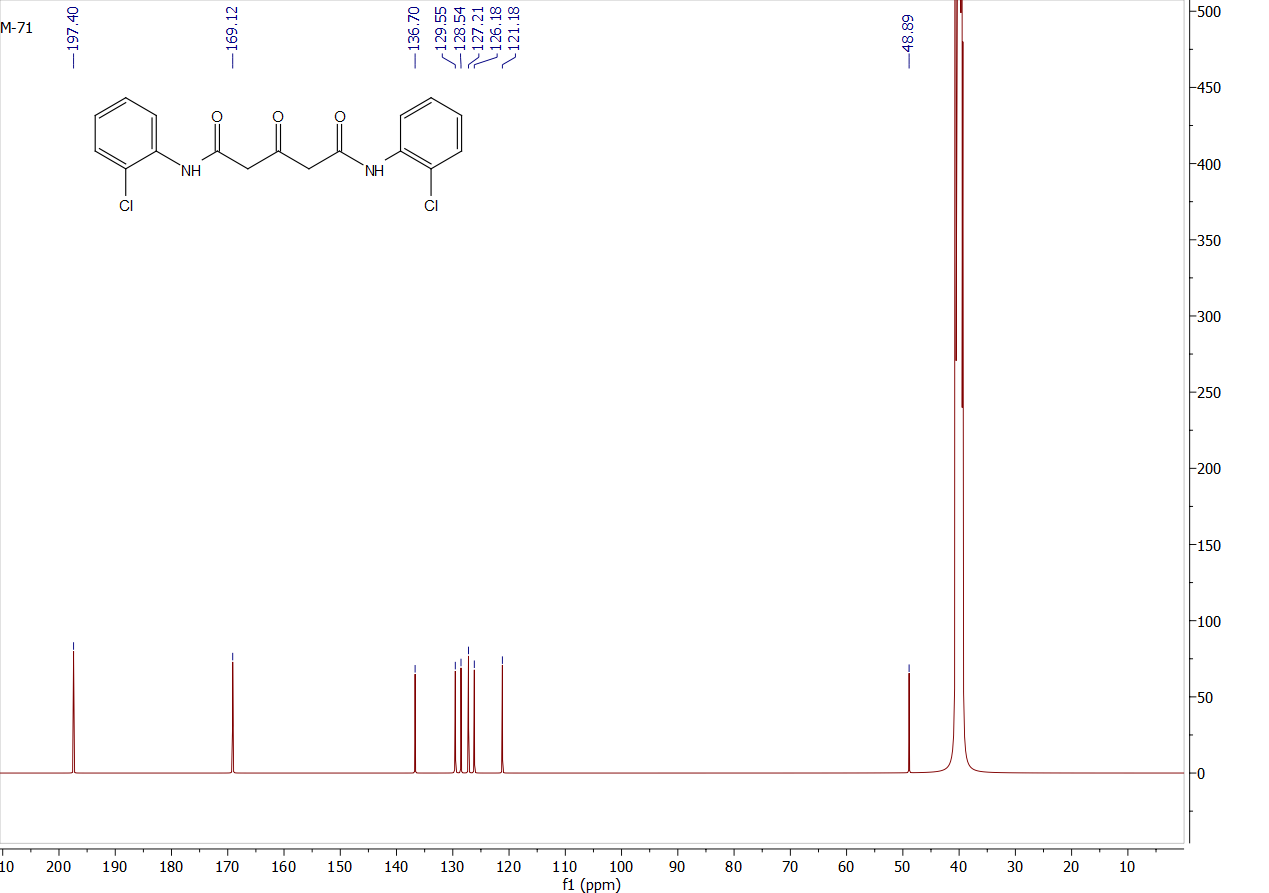


**1b**


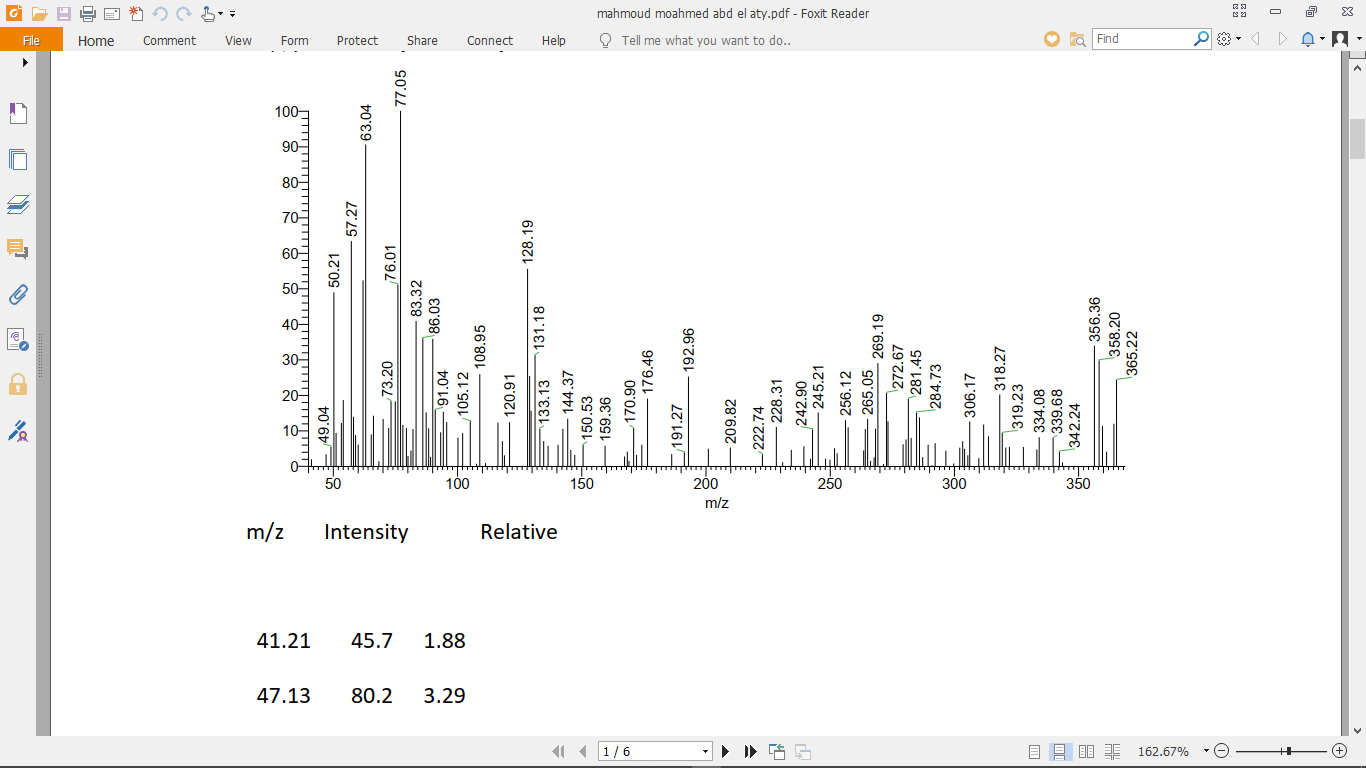


**1b**


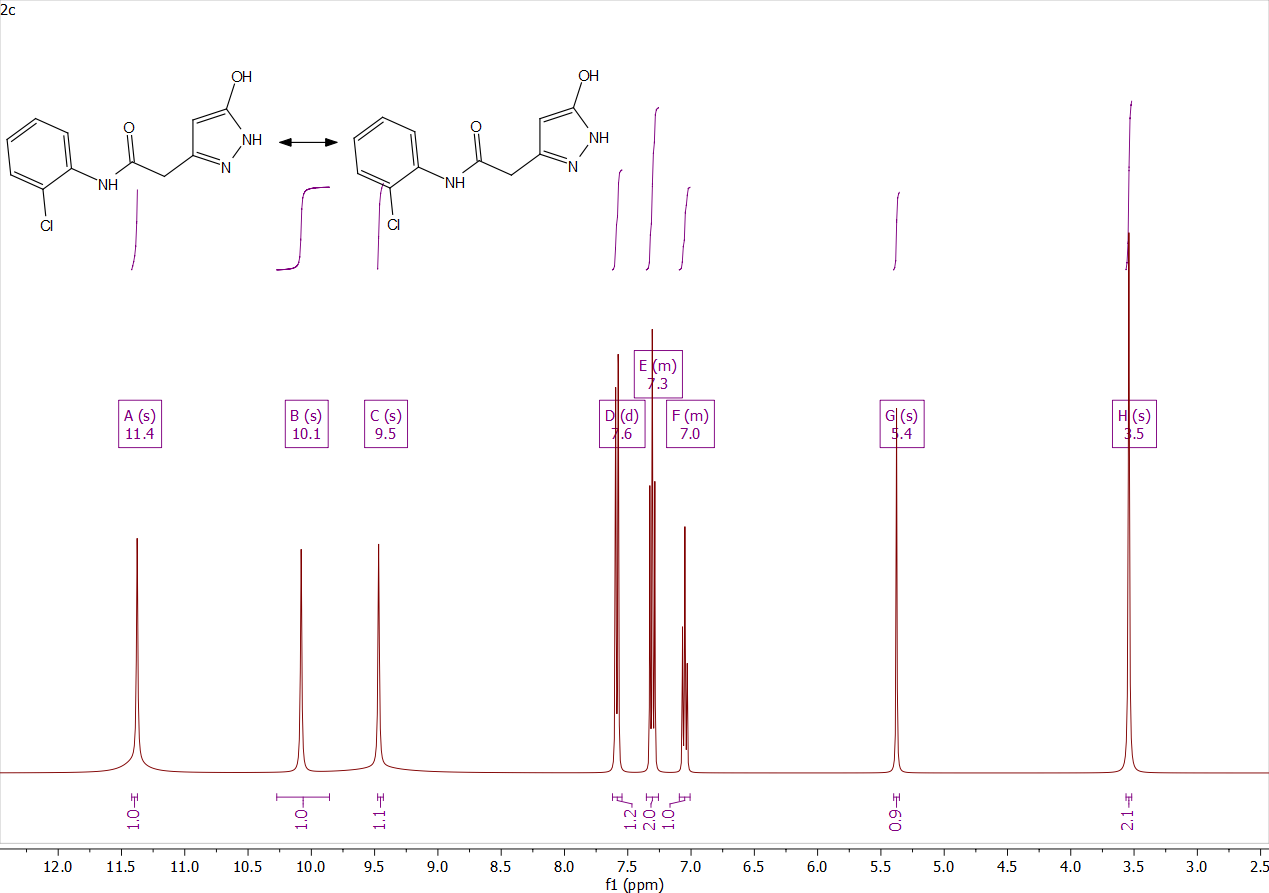


**2c**


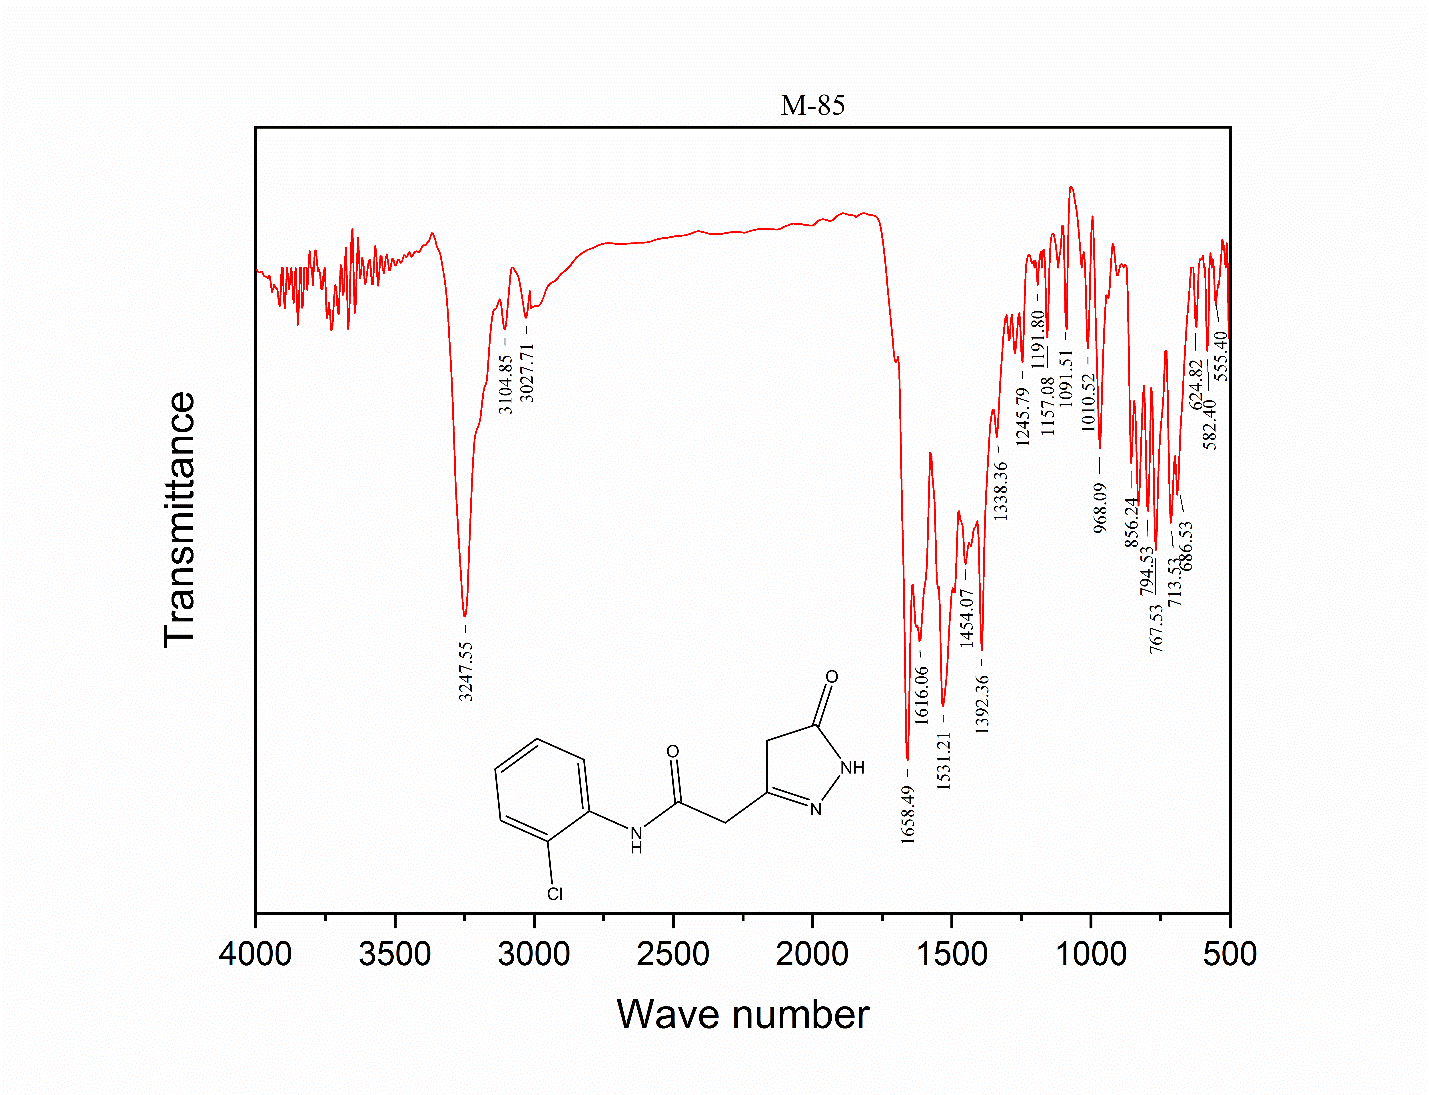


**2c**


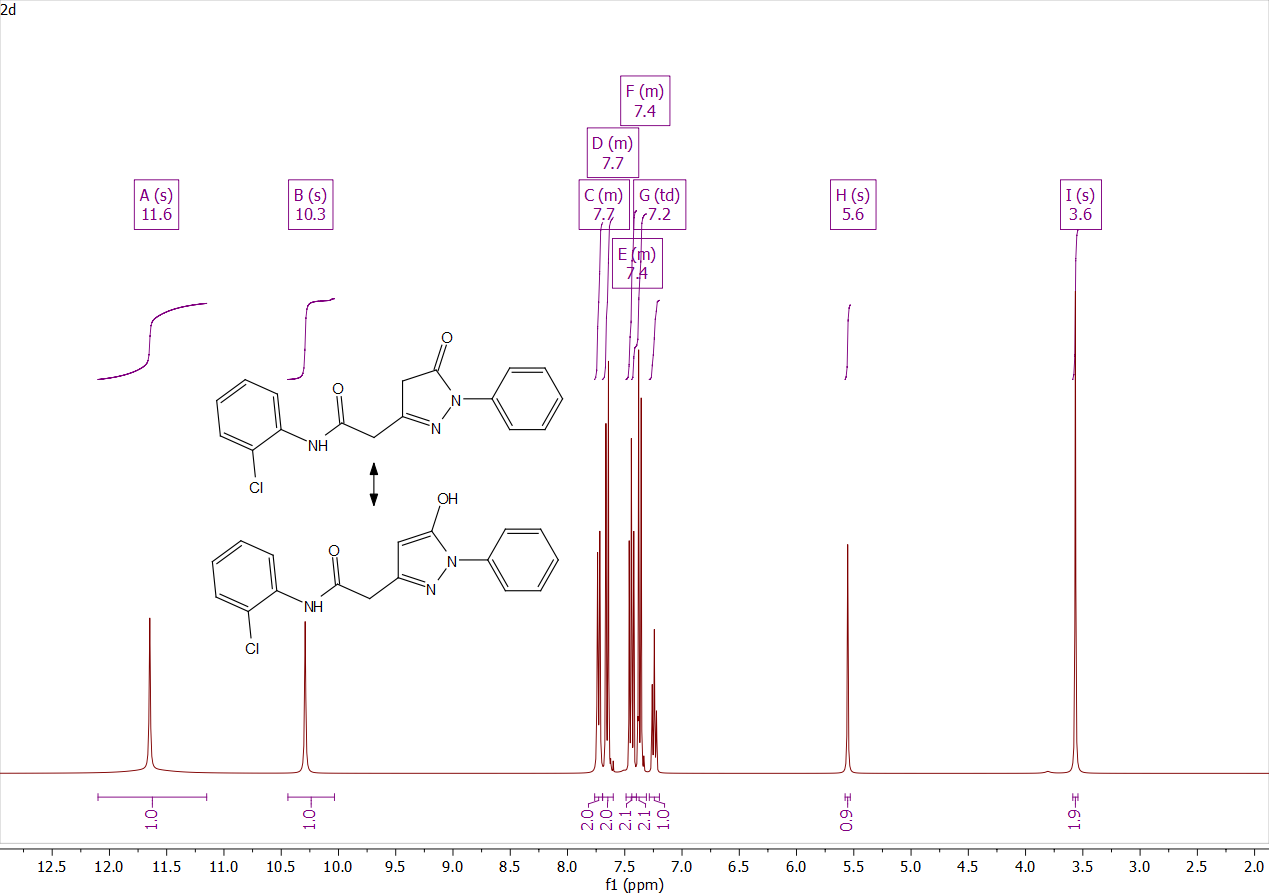


**2d**


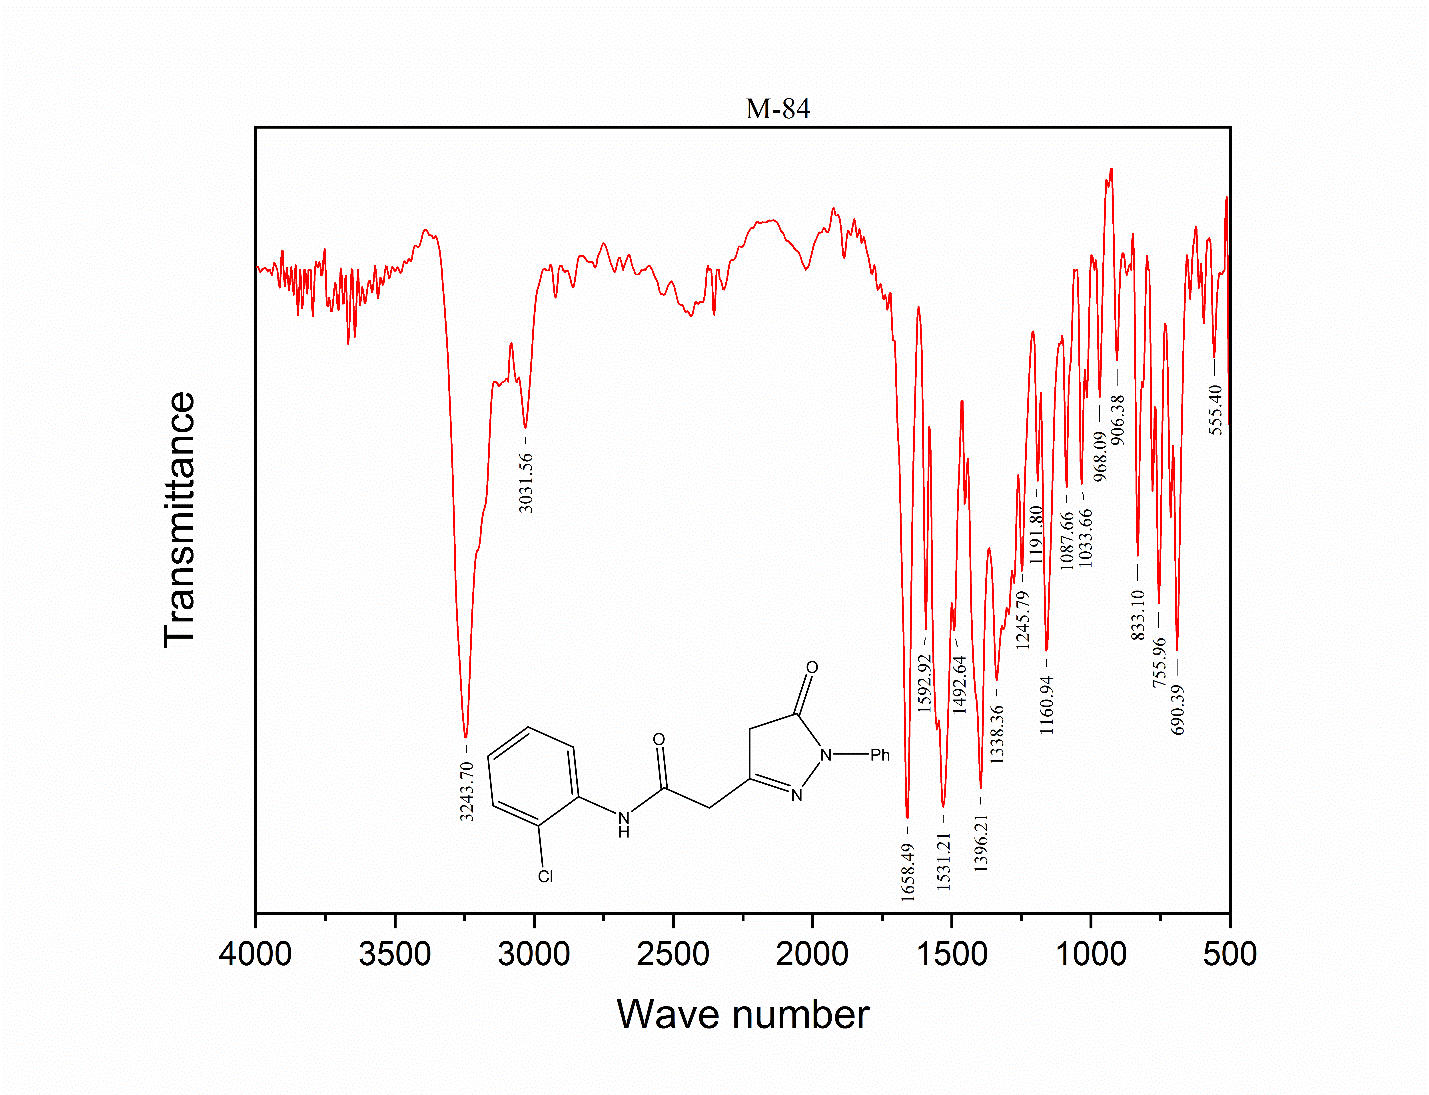


**2d**


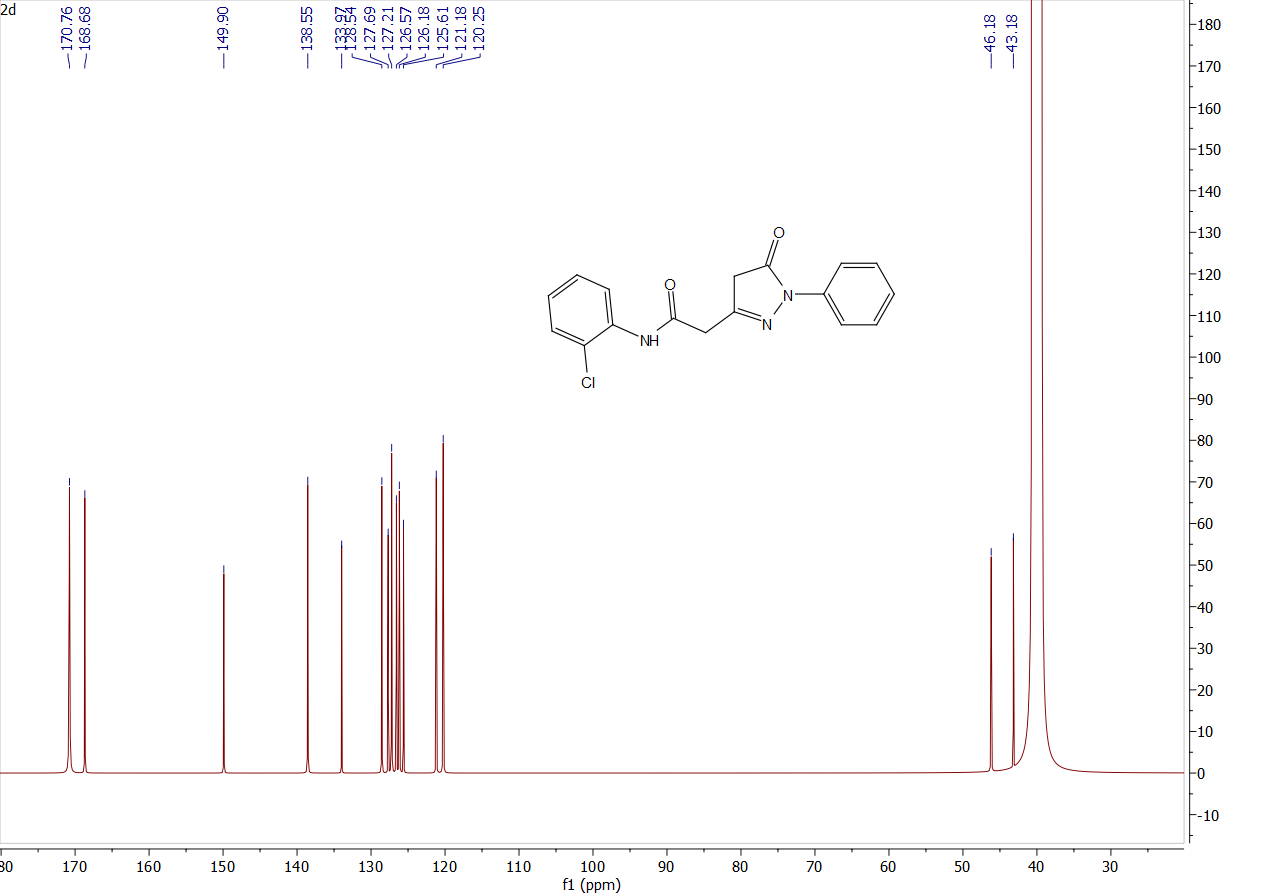


**2d**


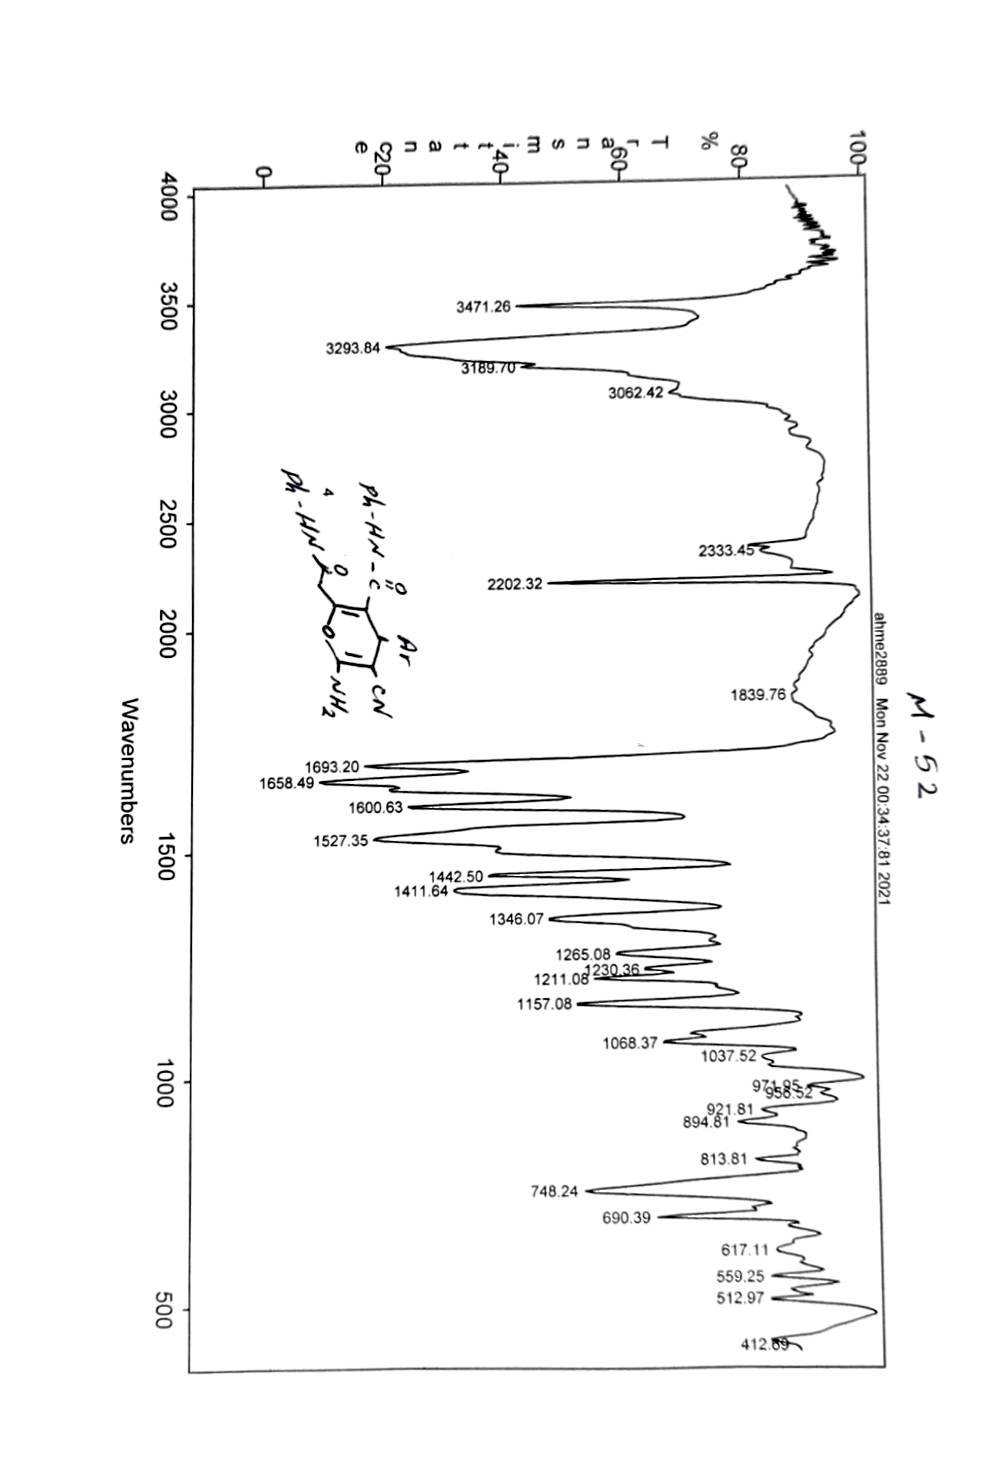


**3a**


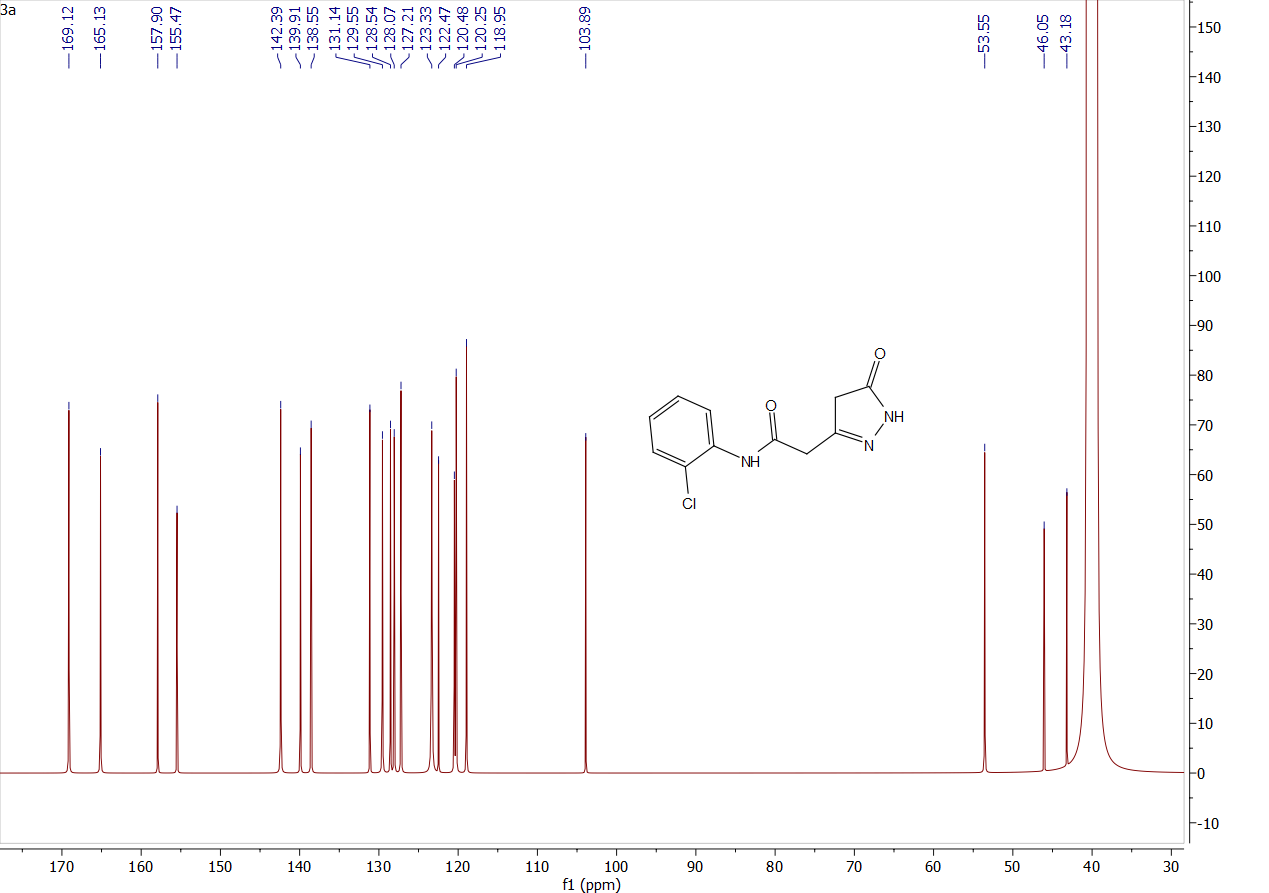


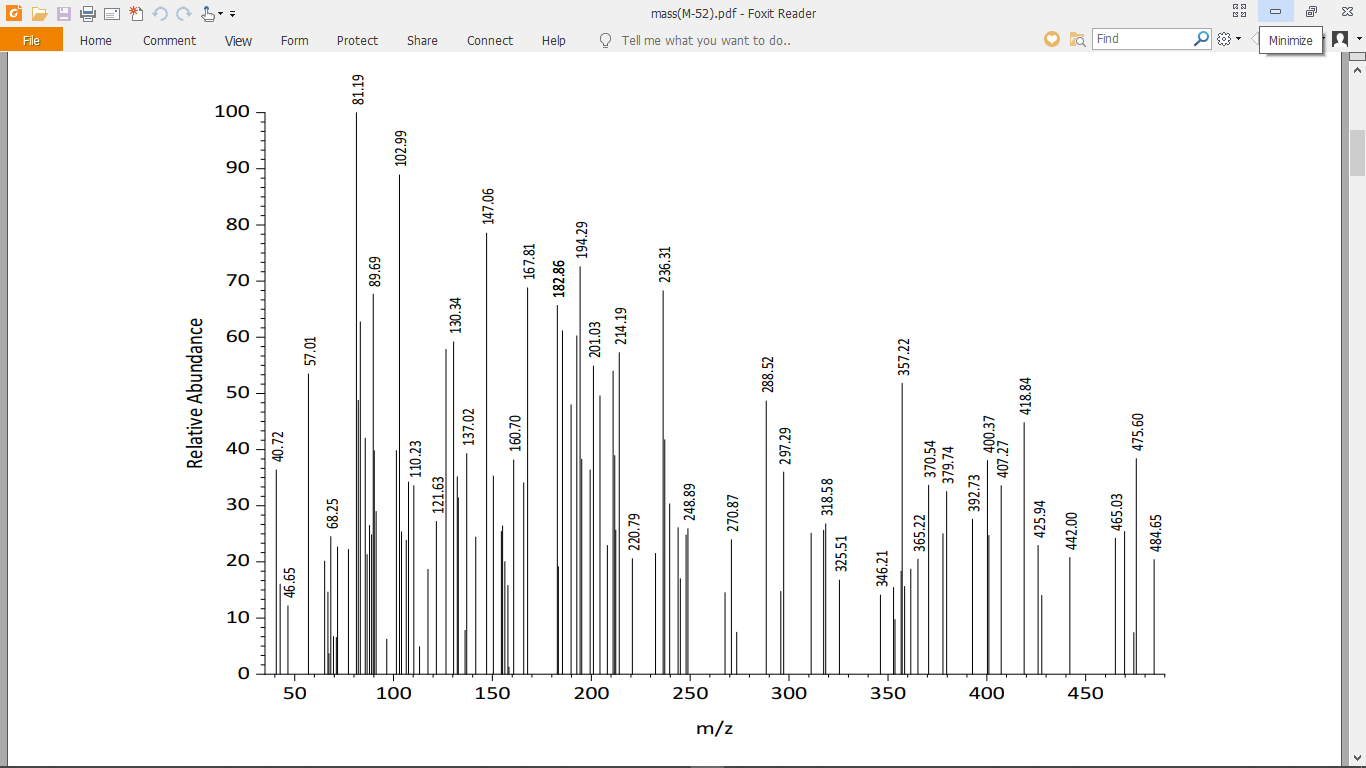


**3a**

**3a**


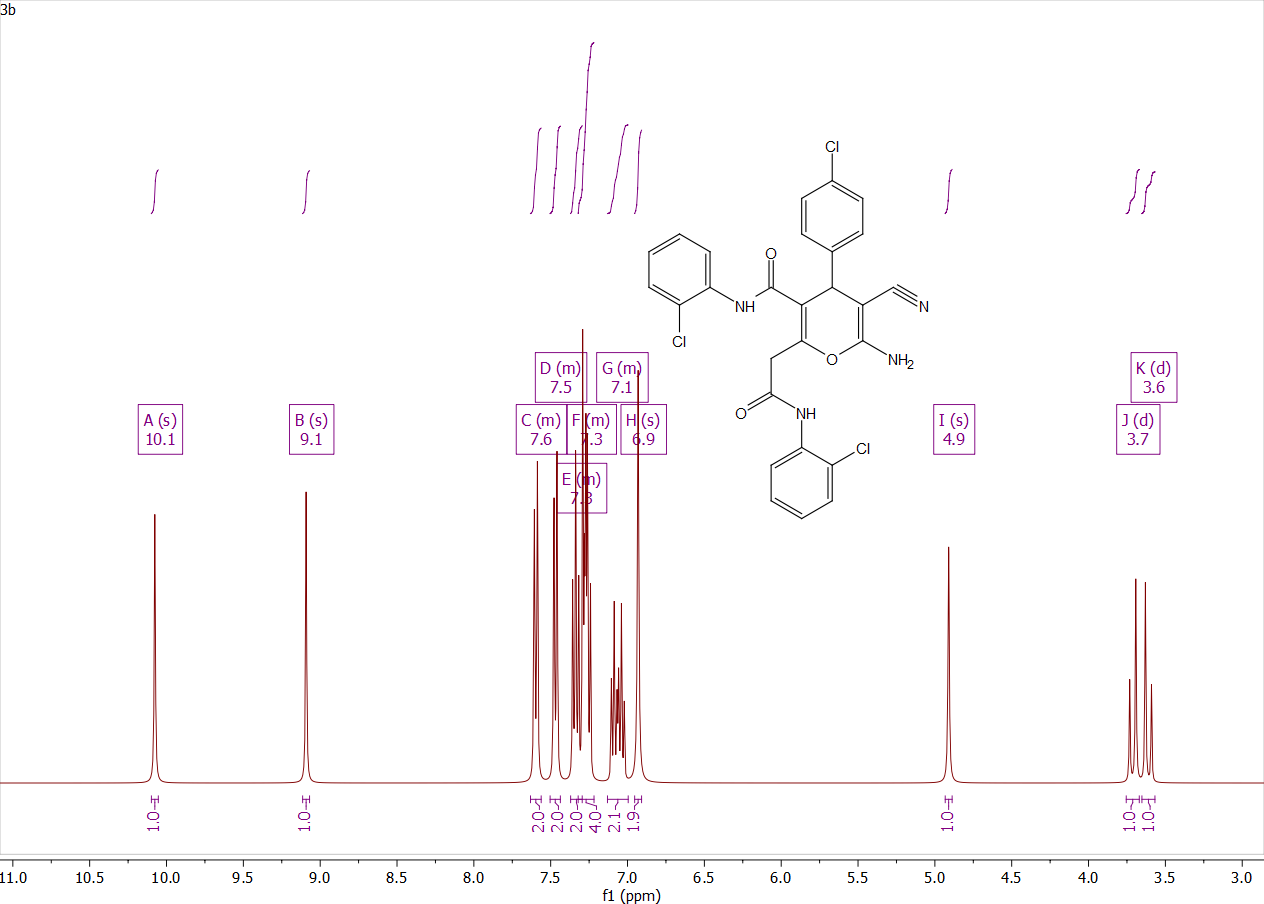


**3b**


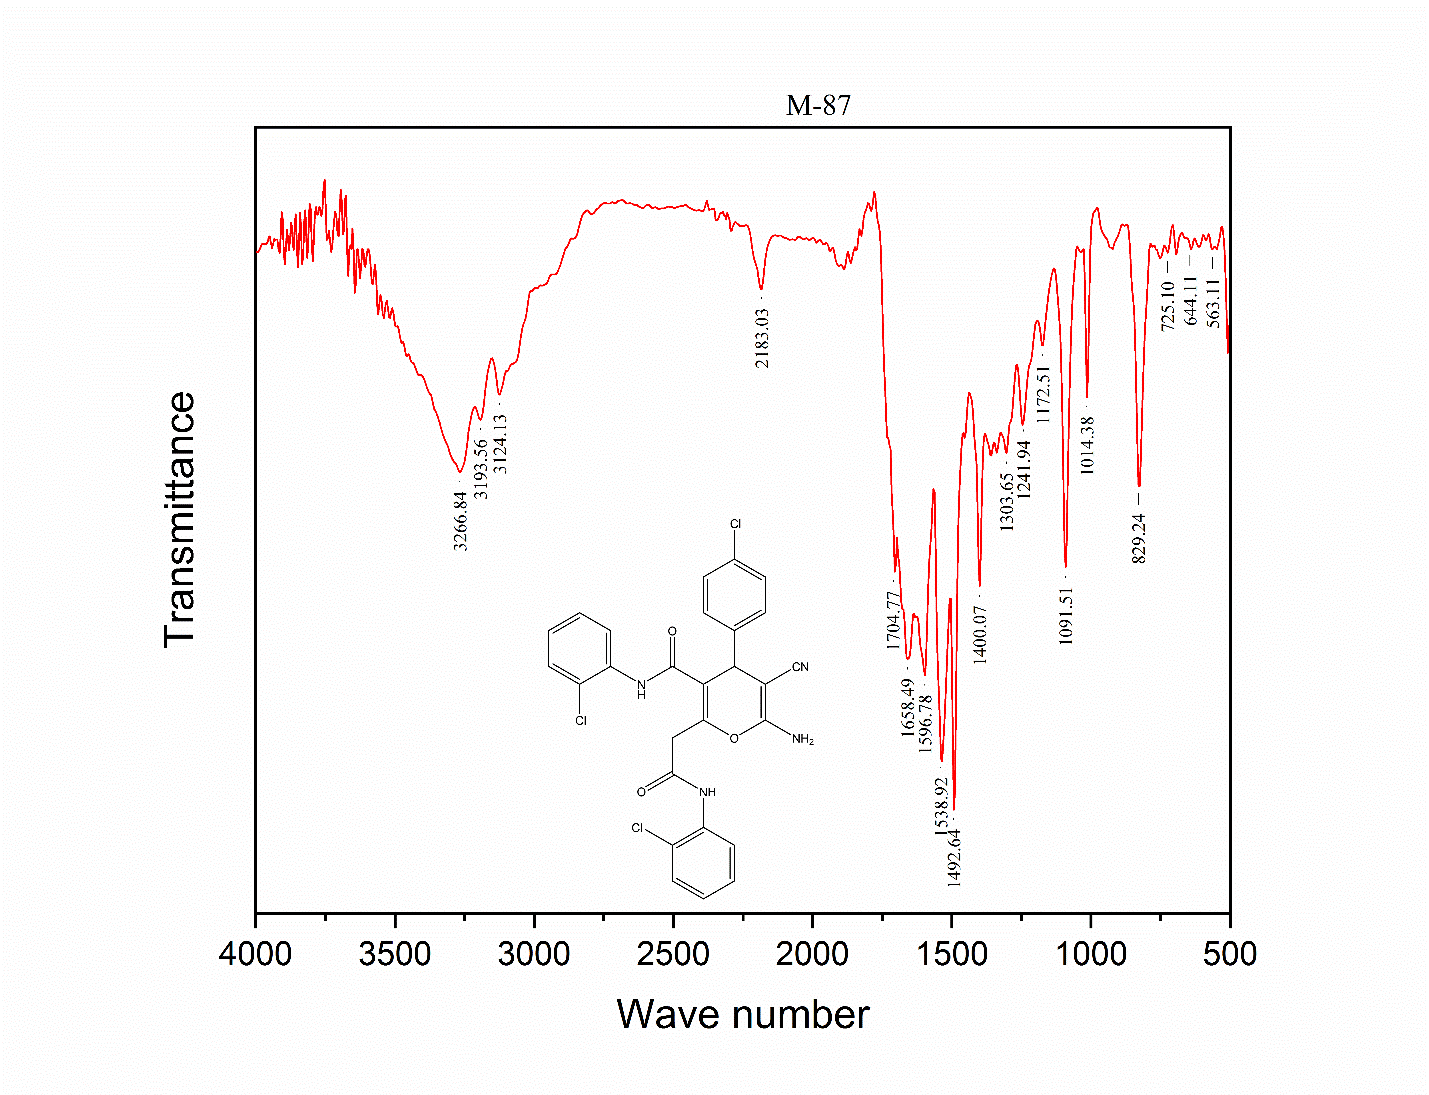


**3b**


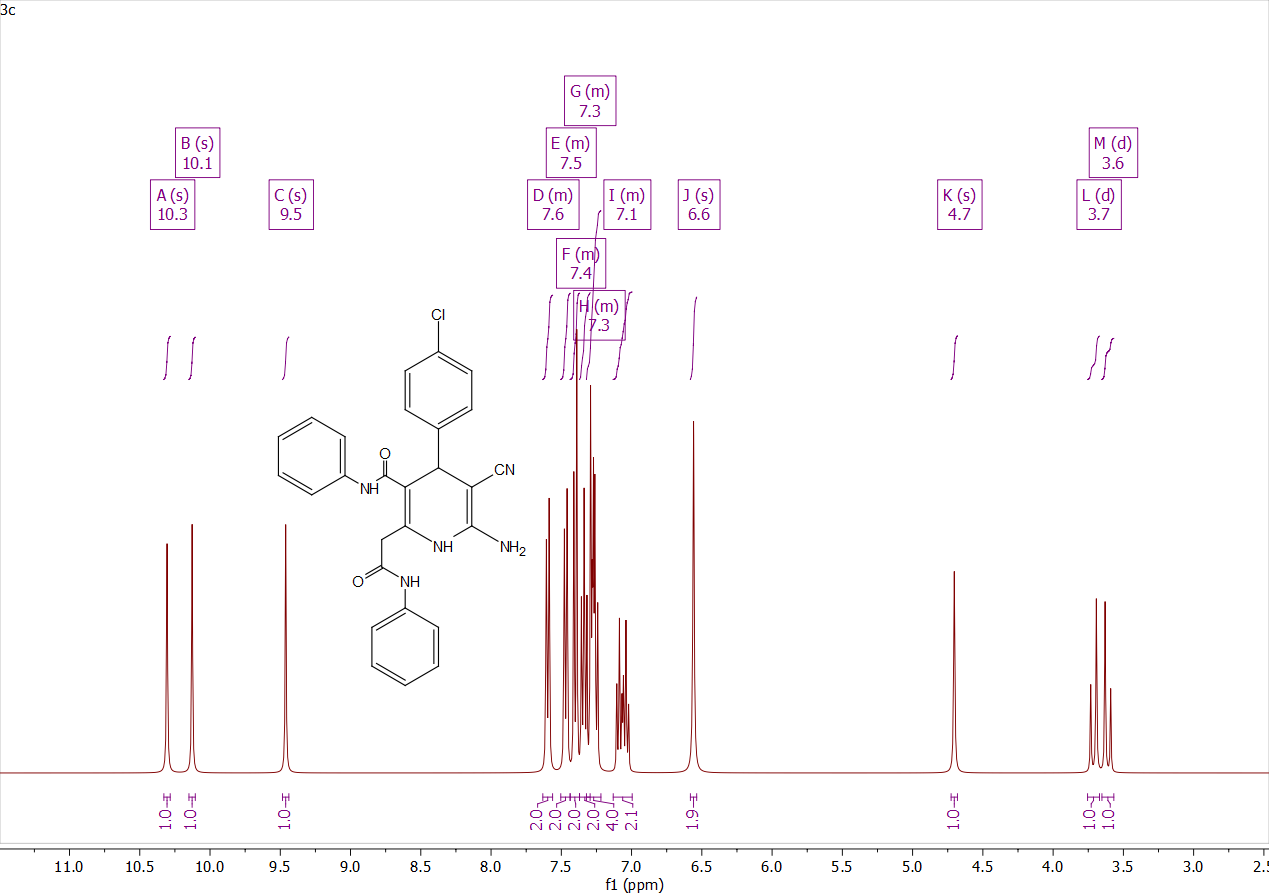


**3c**


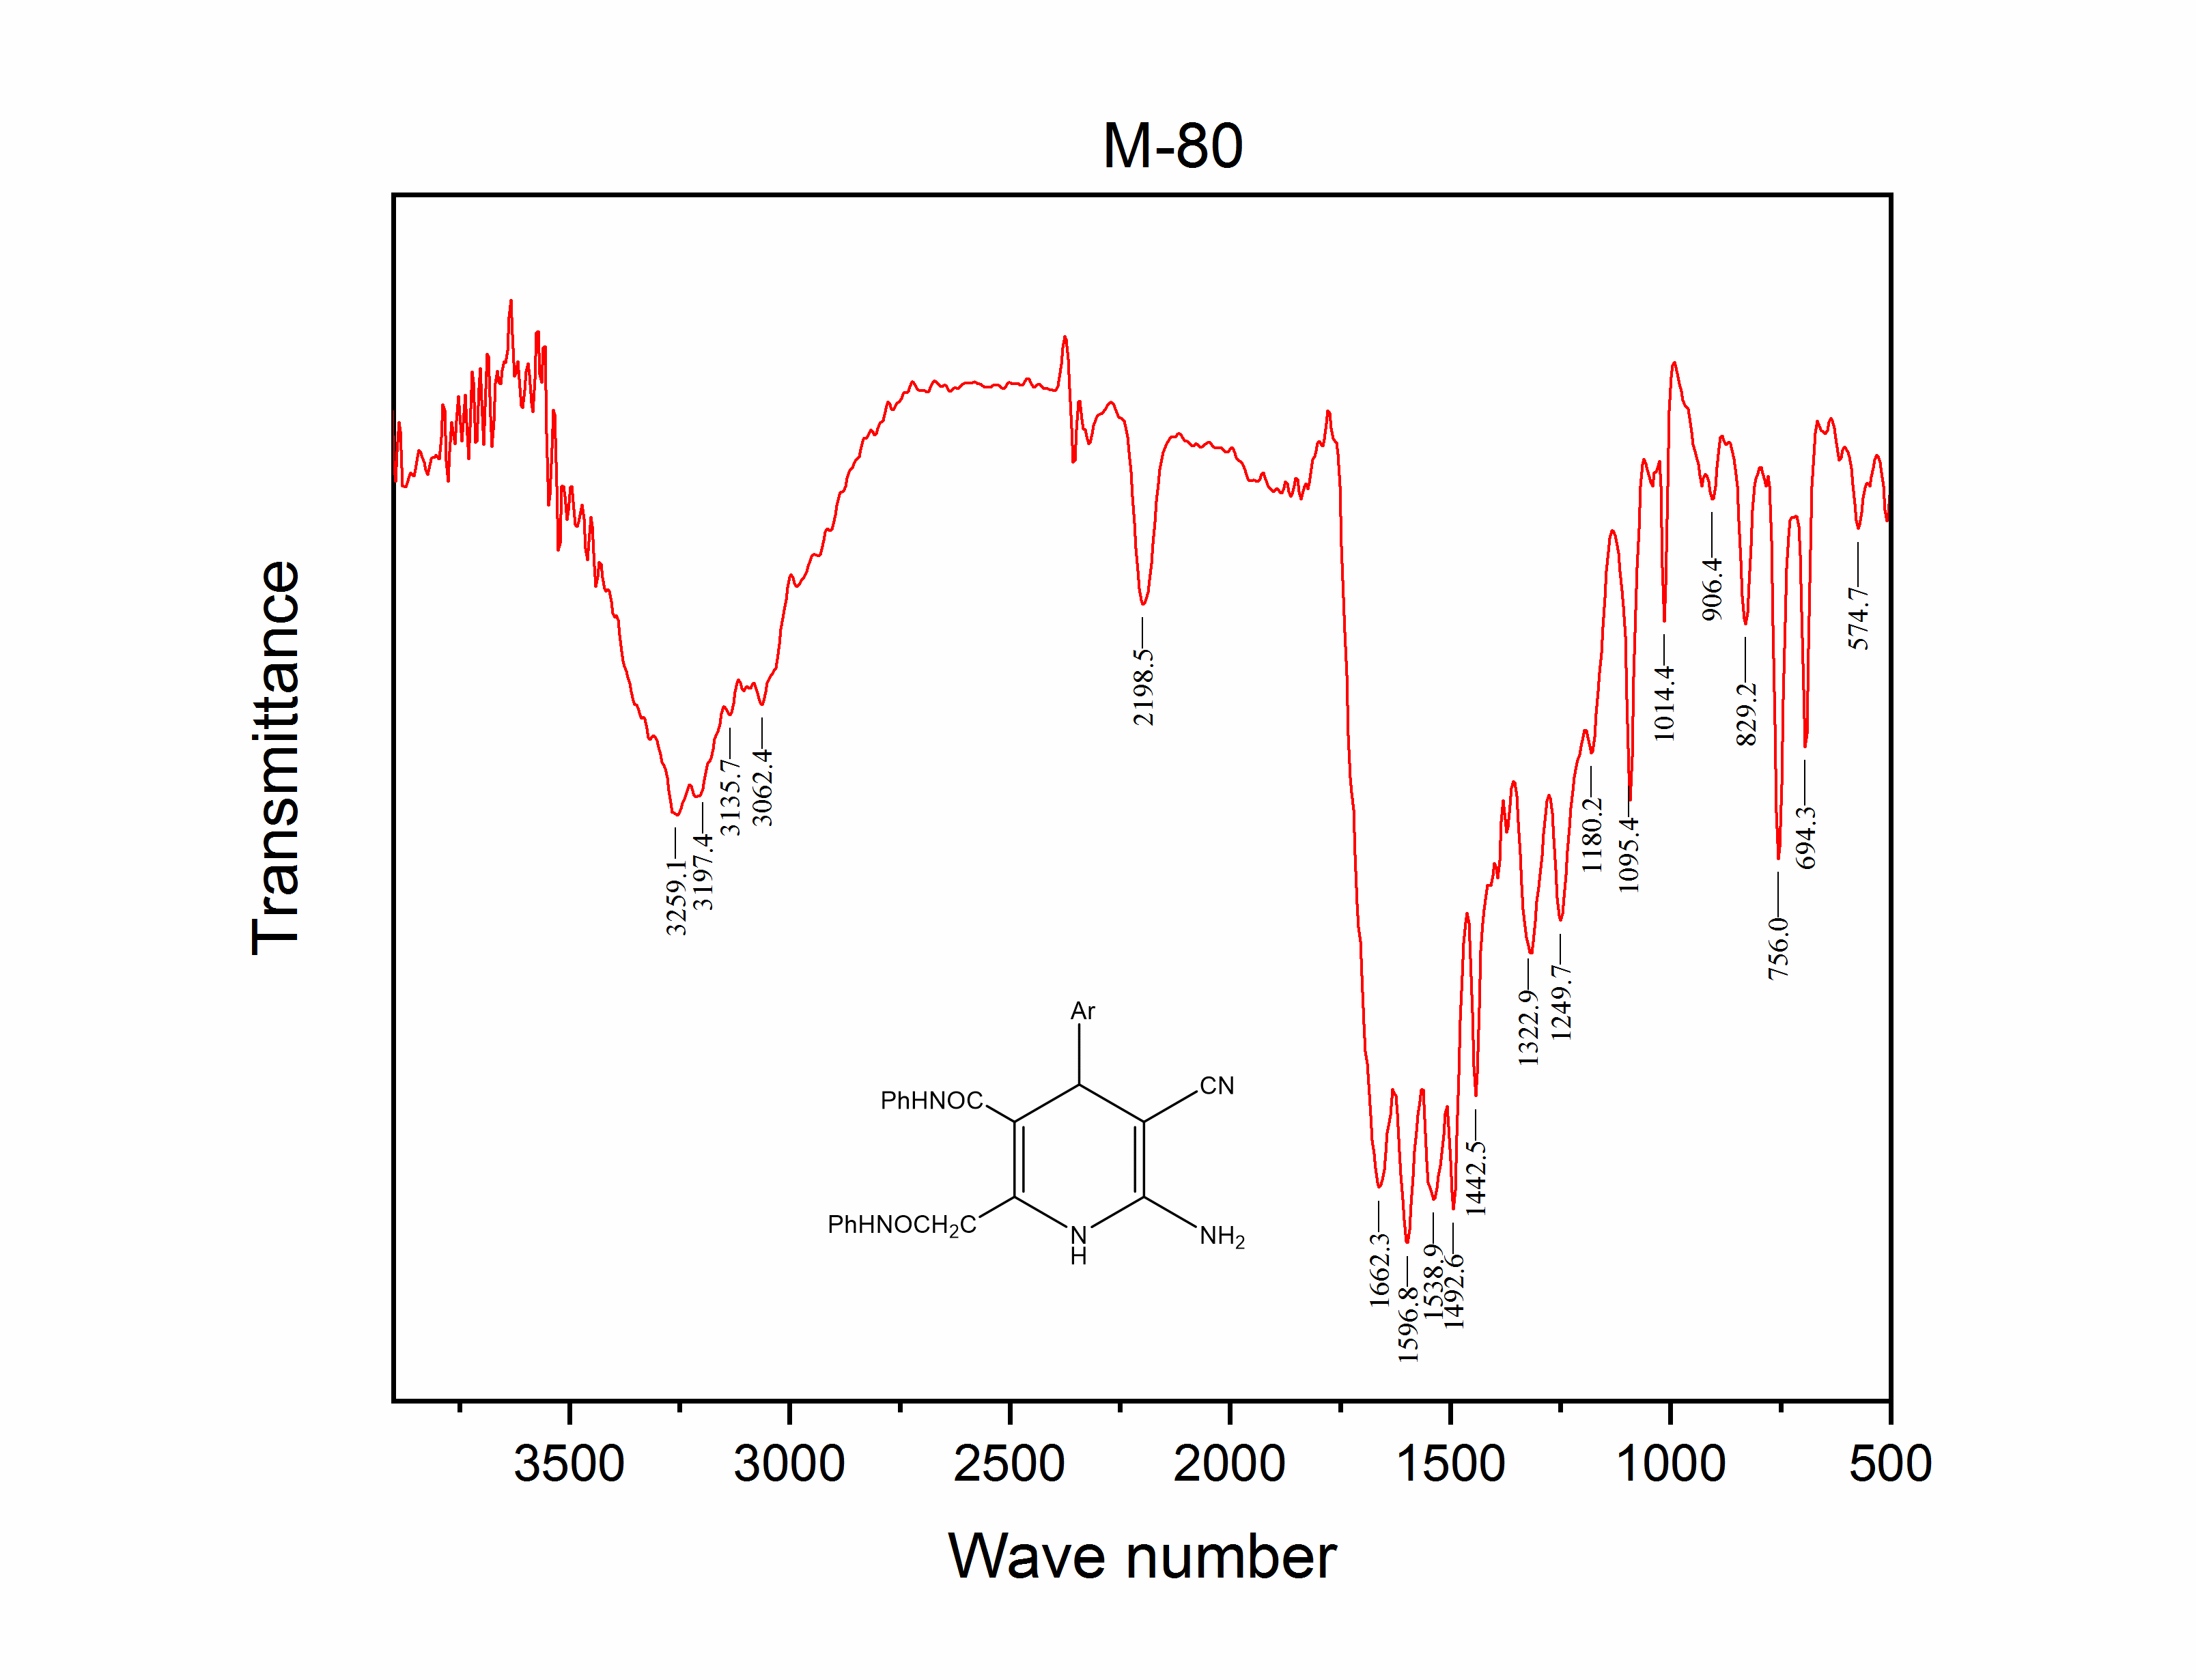


**3c**


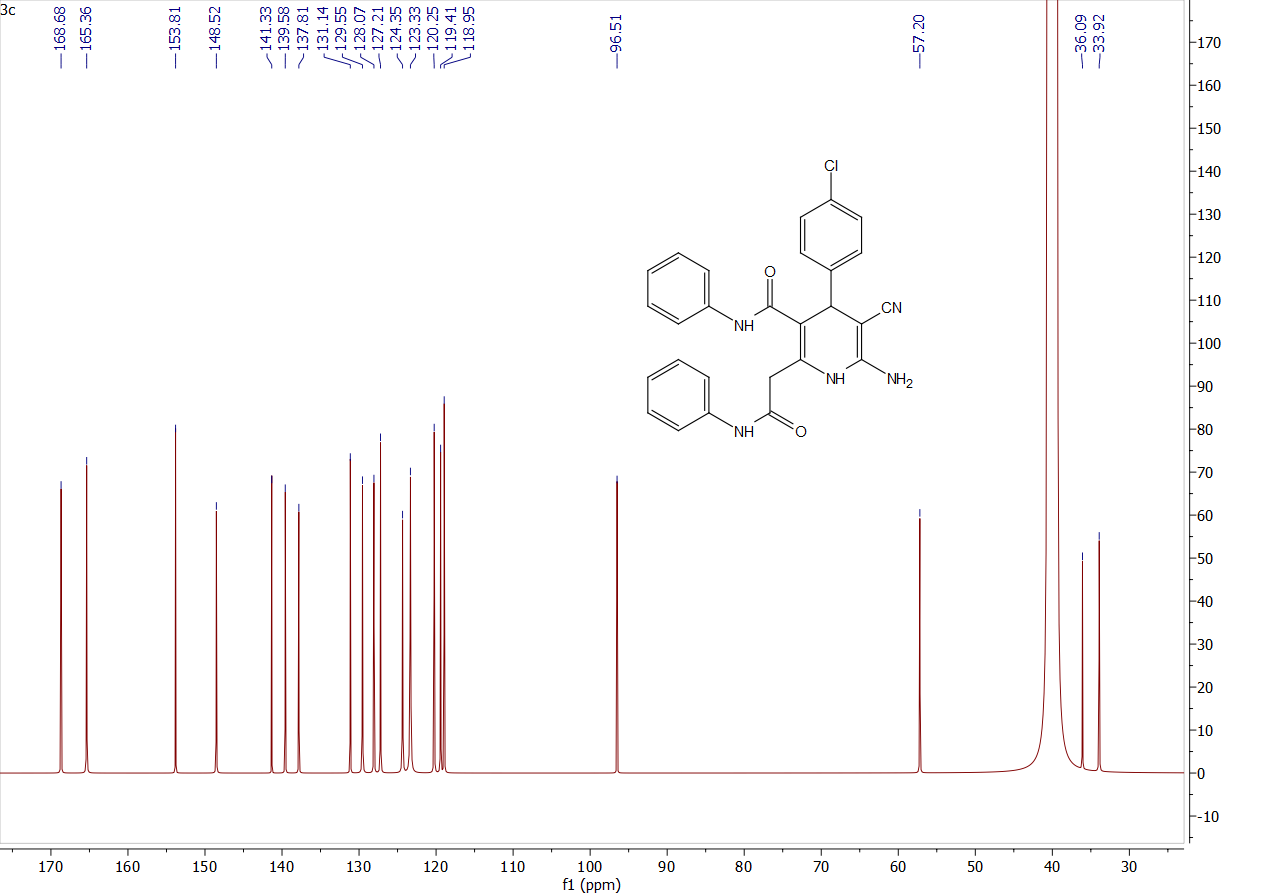


**3c**


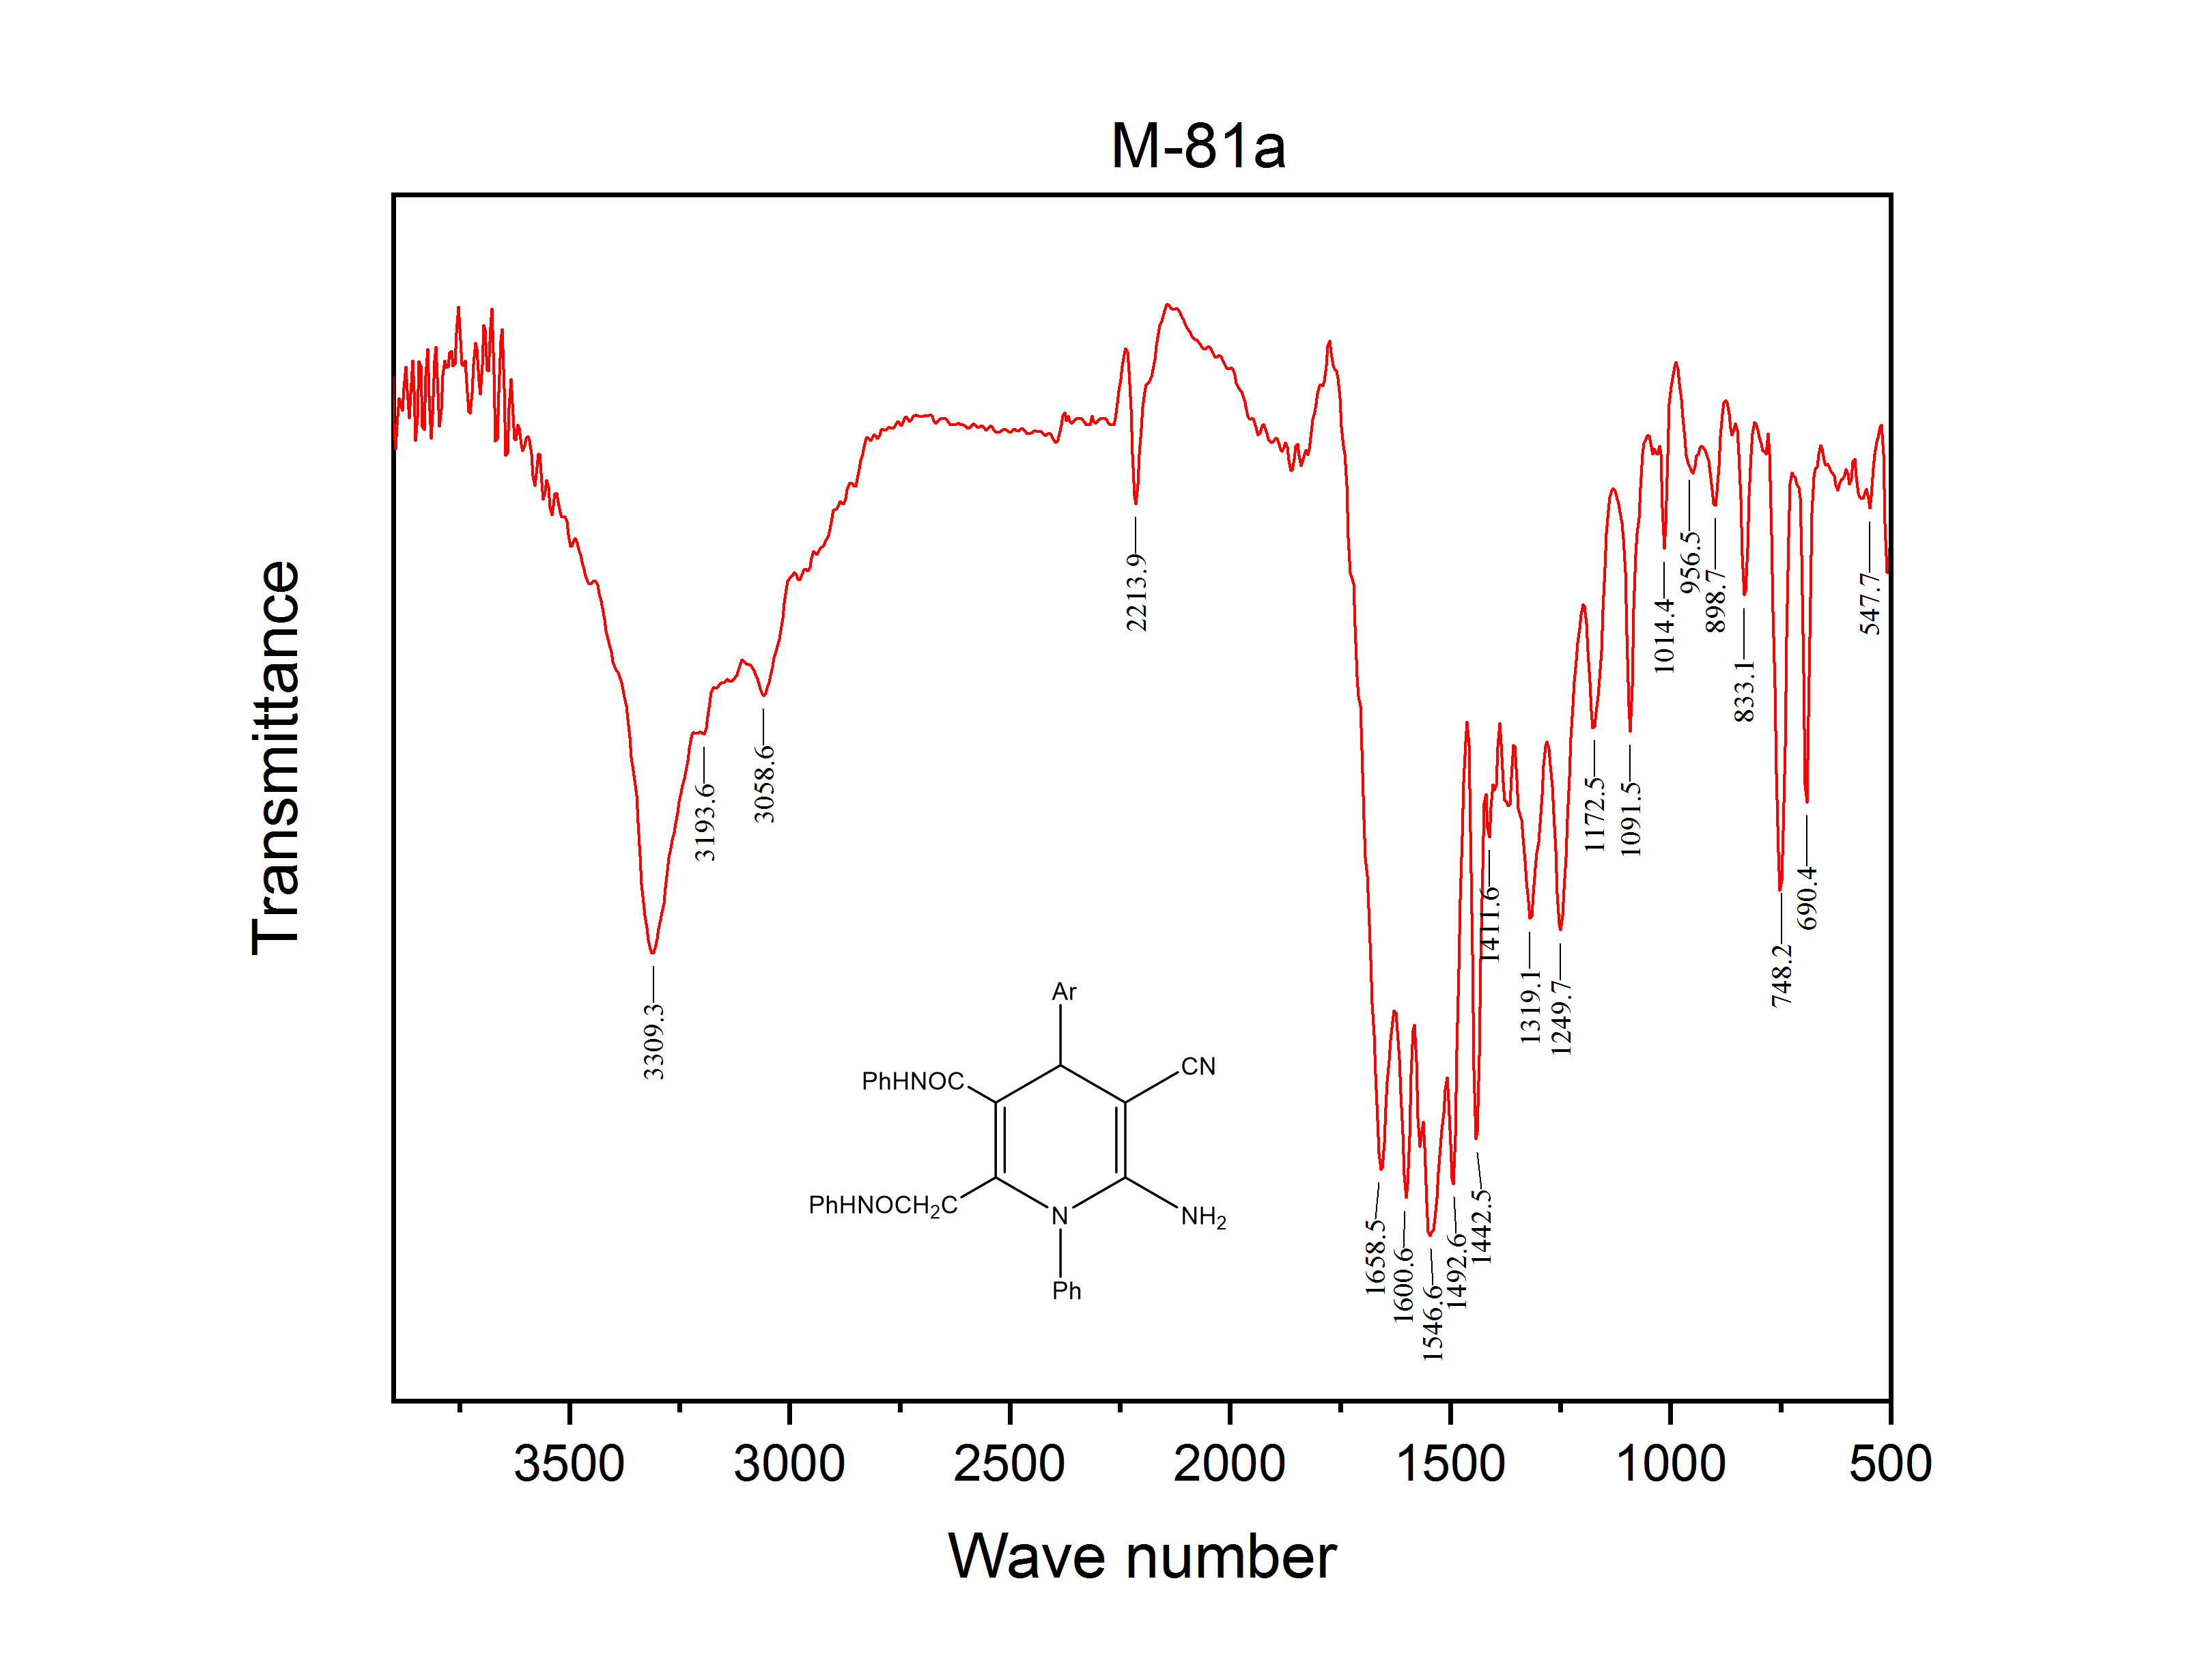


**3d**


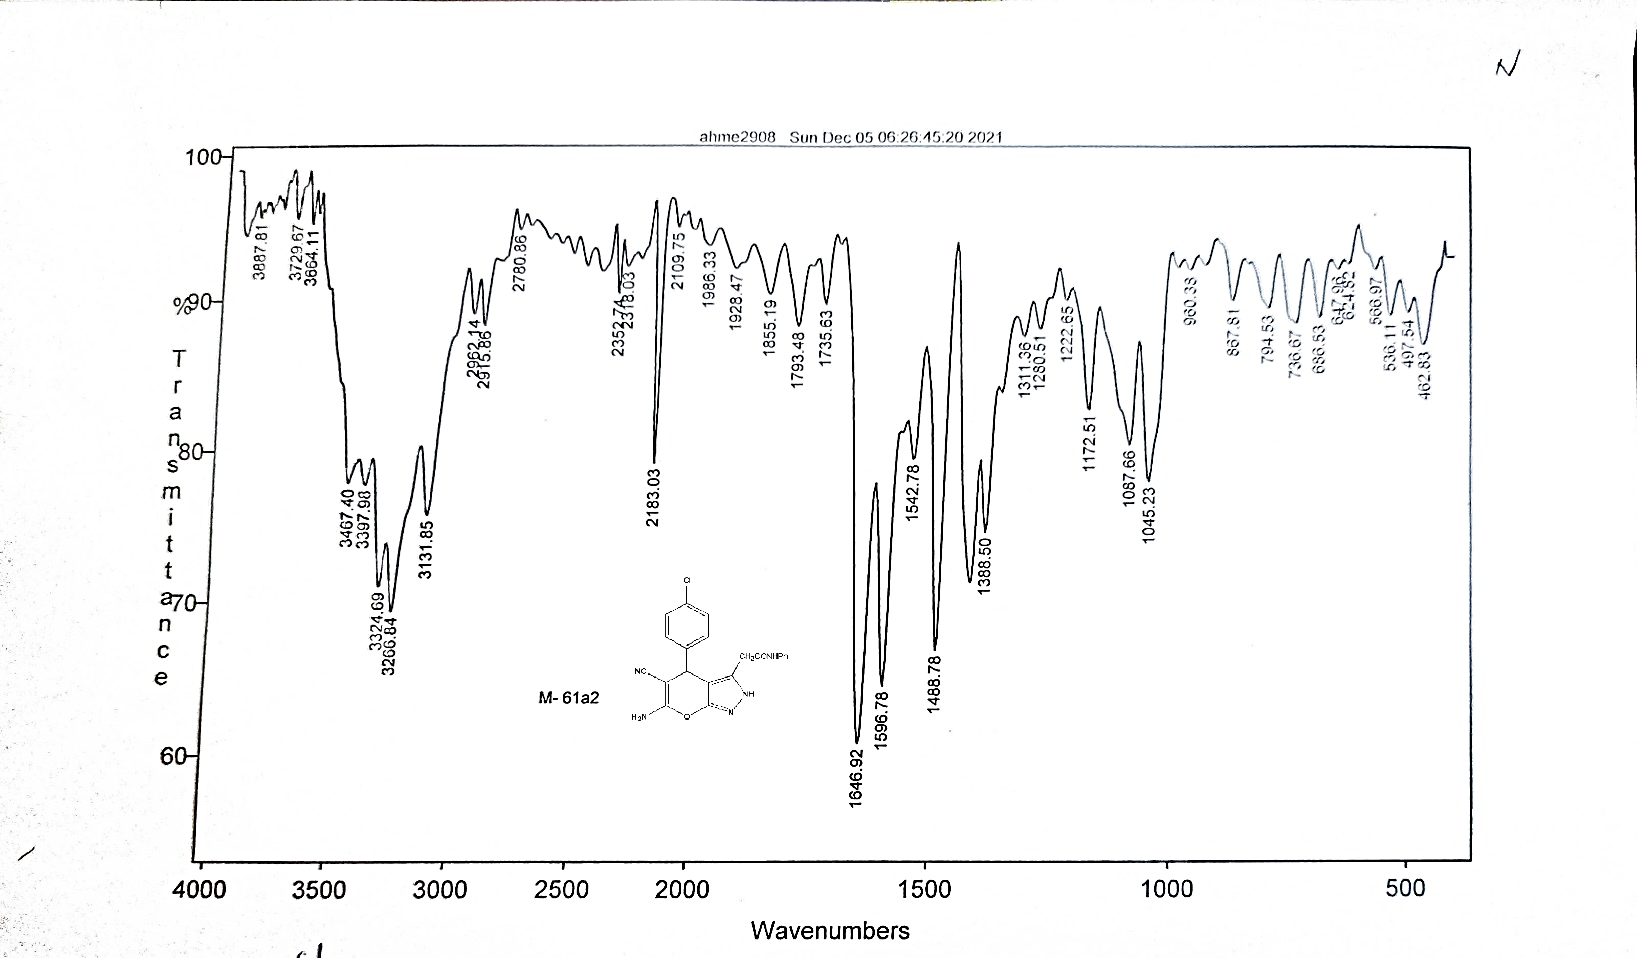


**4a**


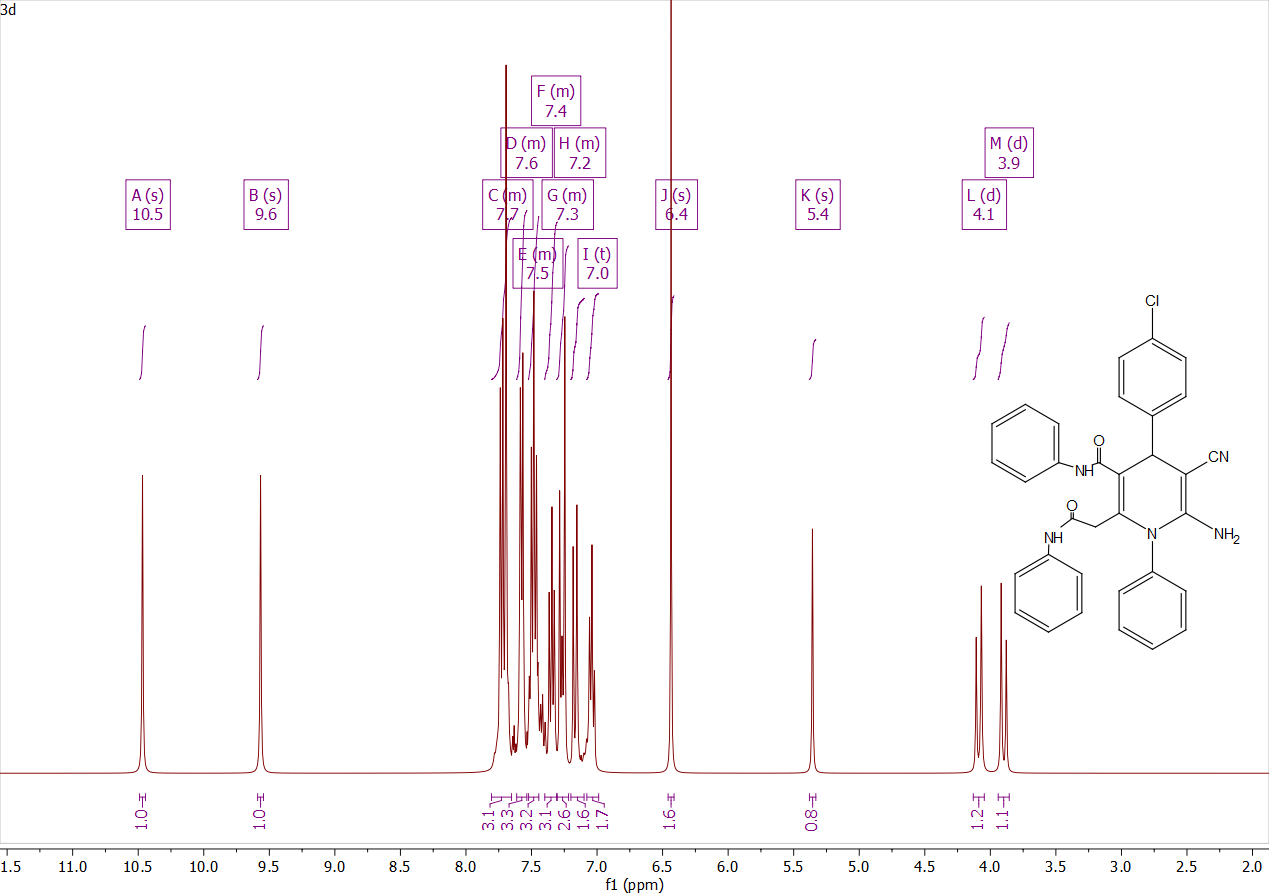


**3d**


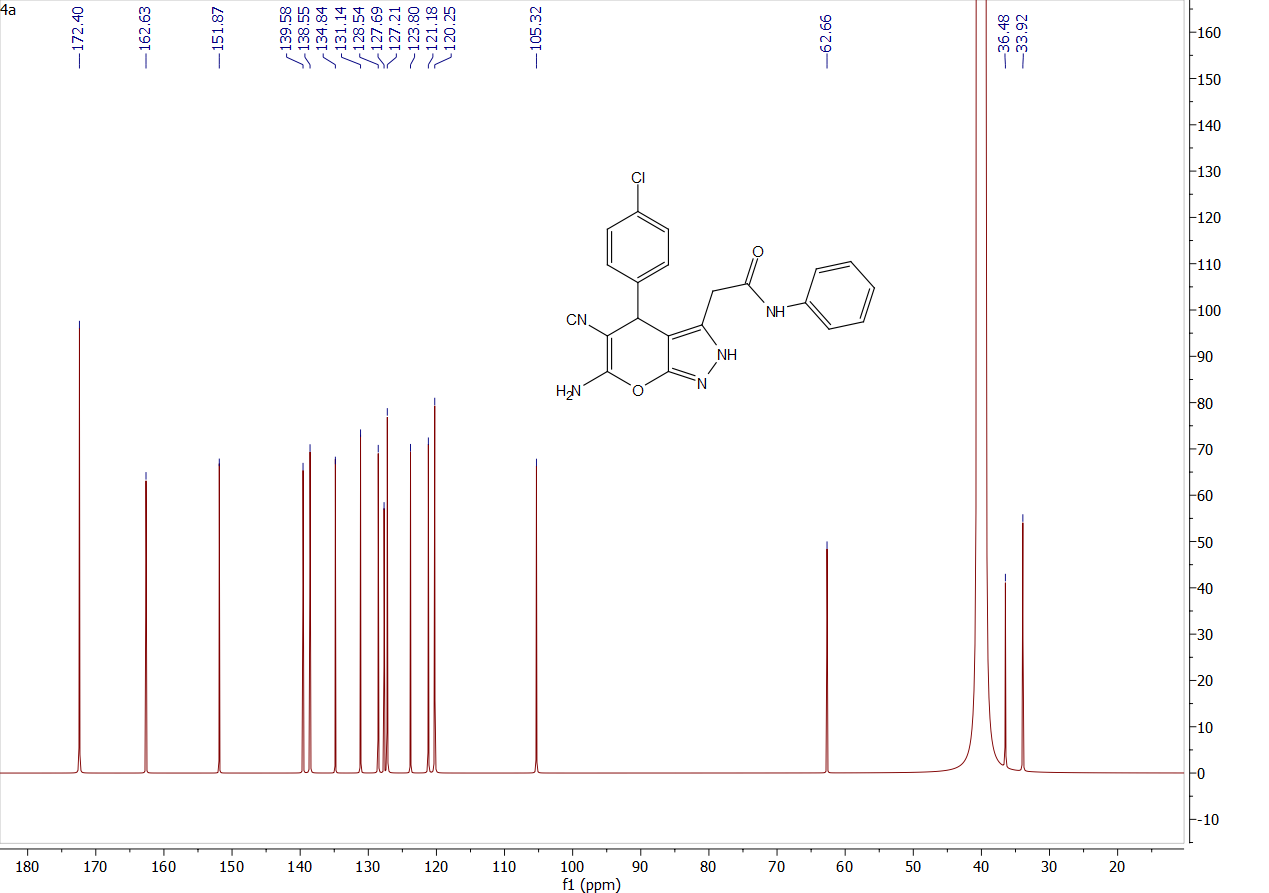


**4a**


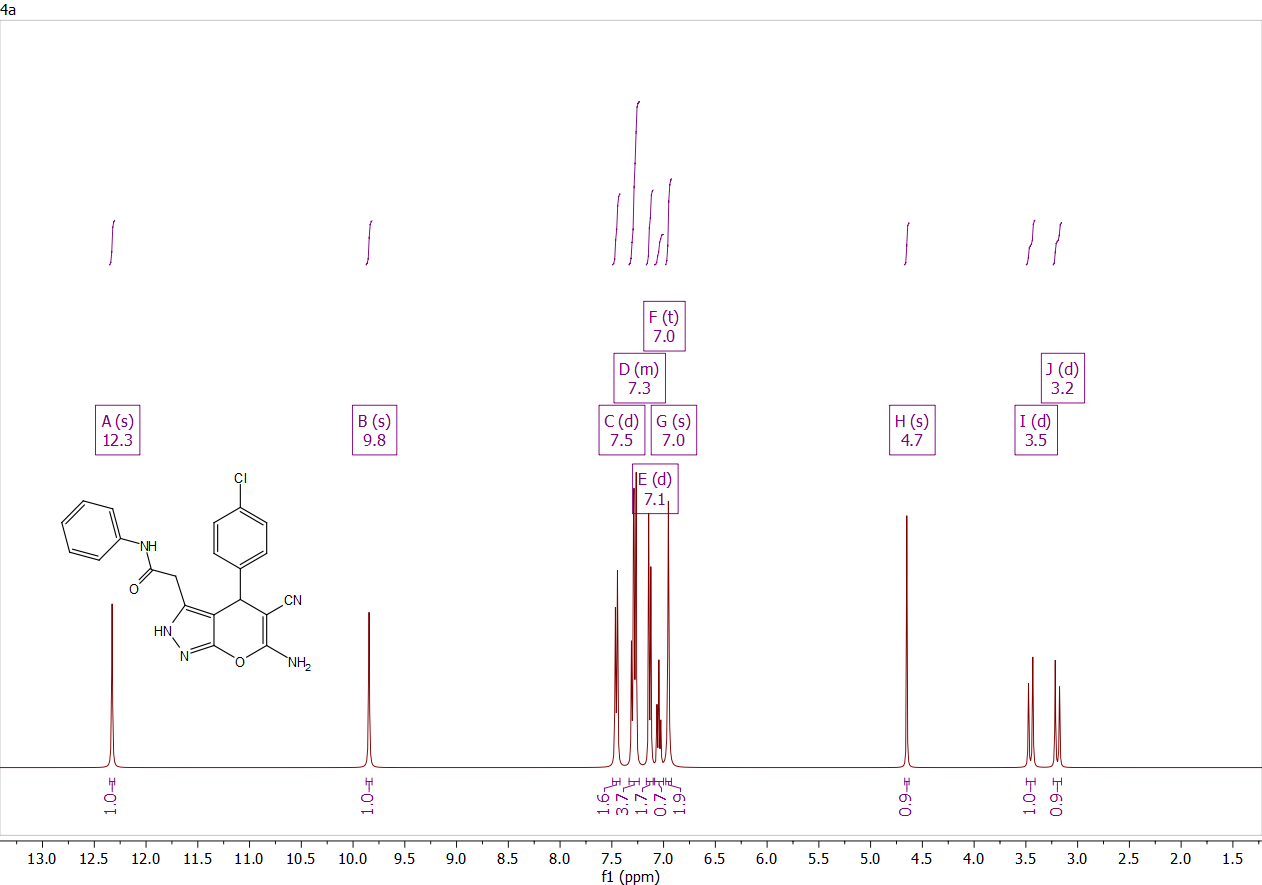


**4a**


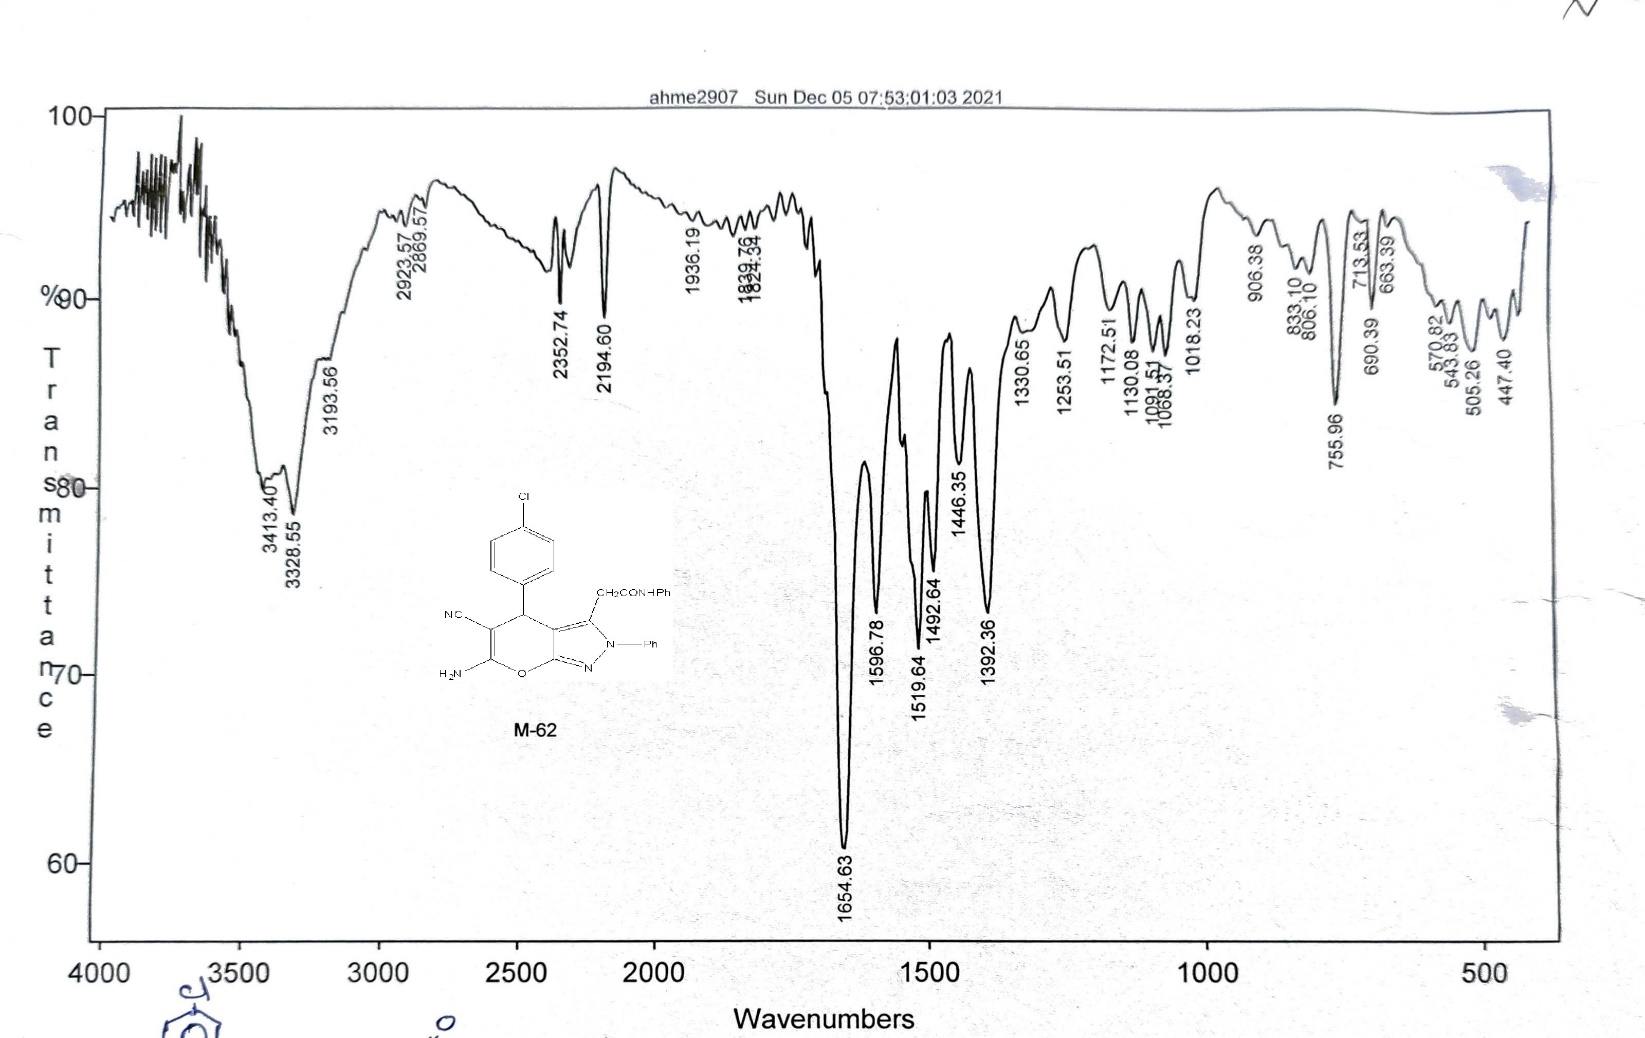


**4b**


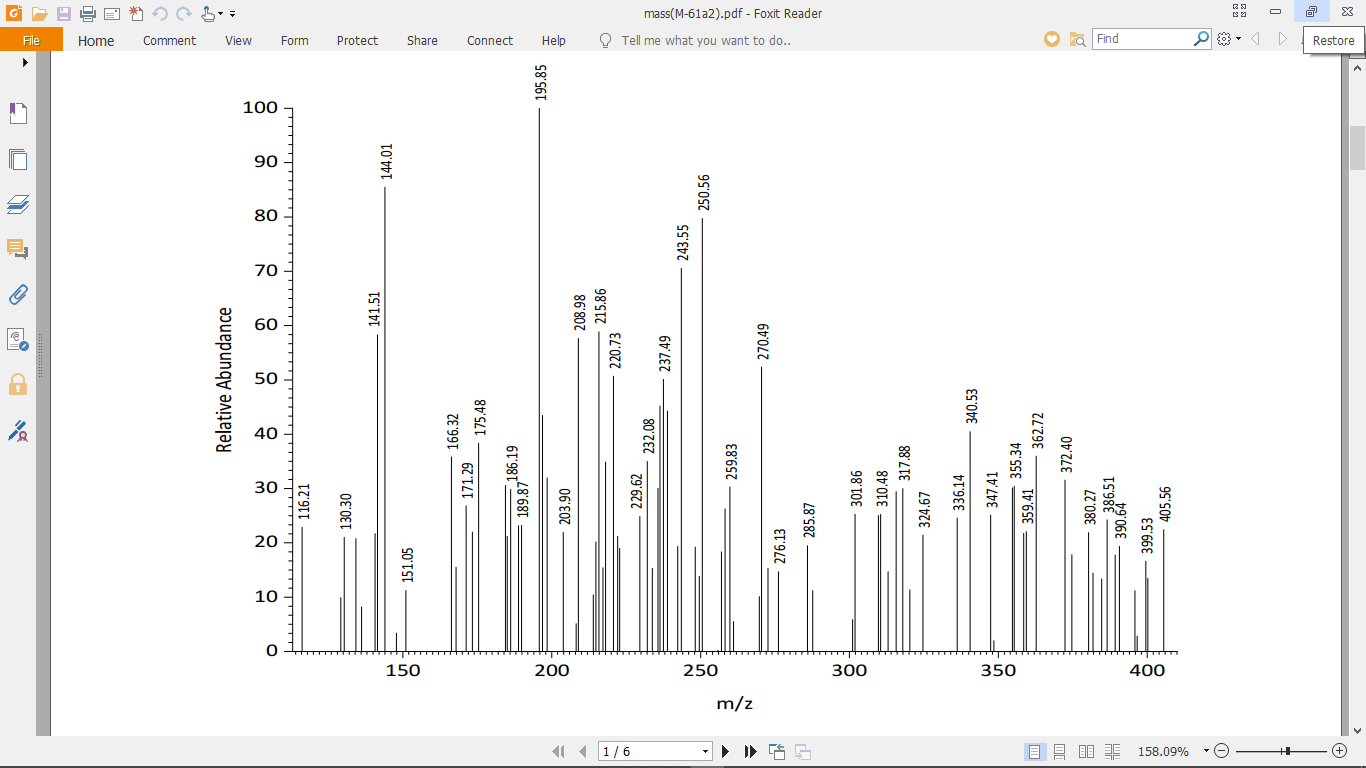


**4a**


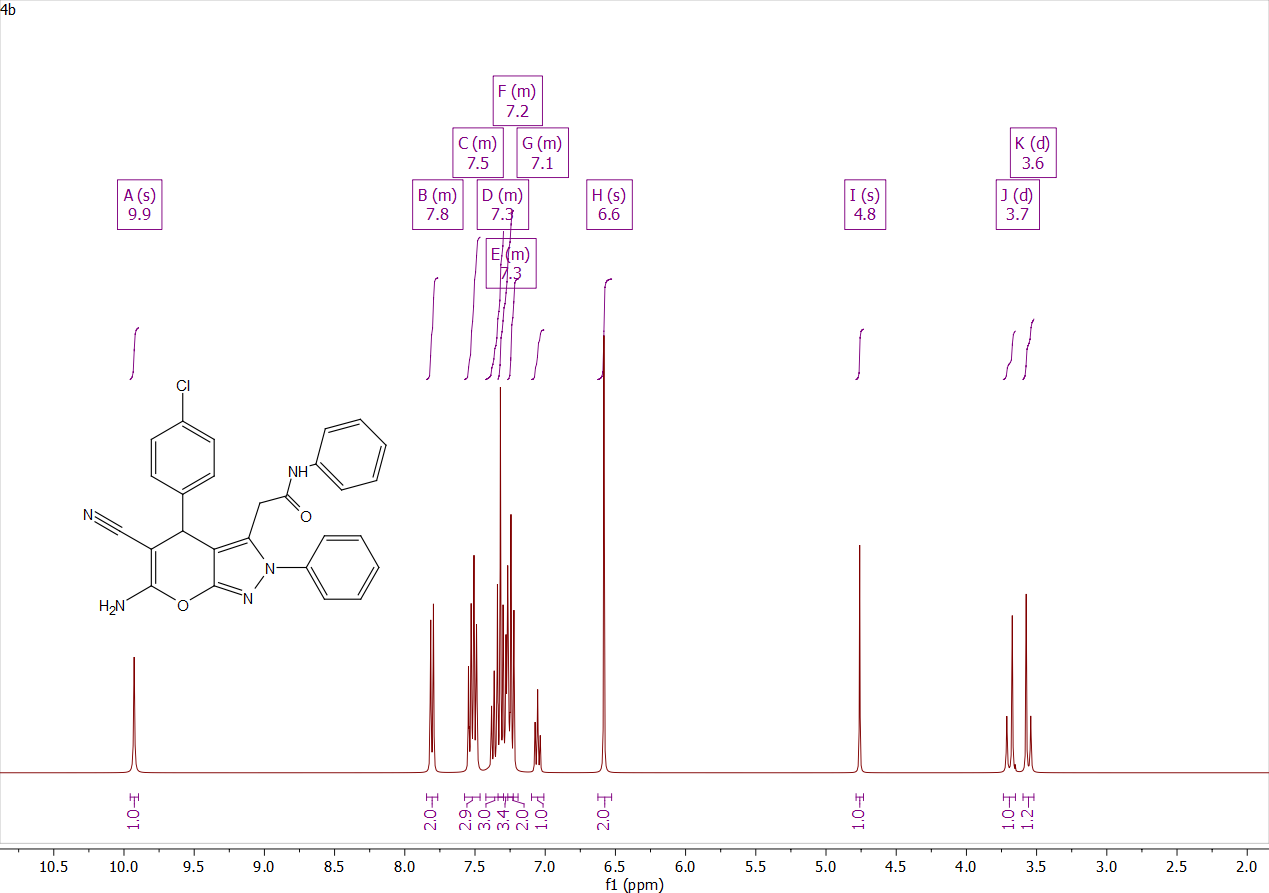


**4b**


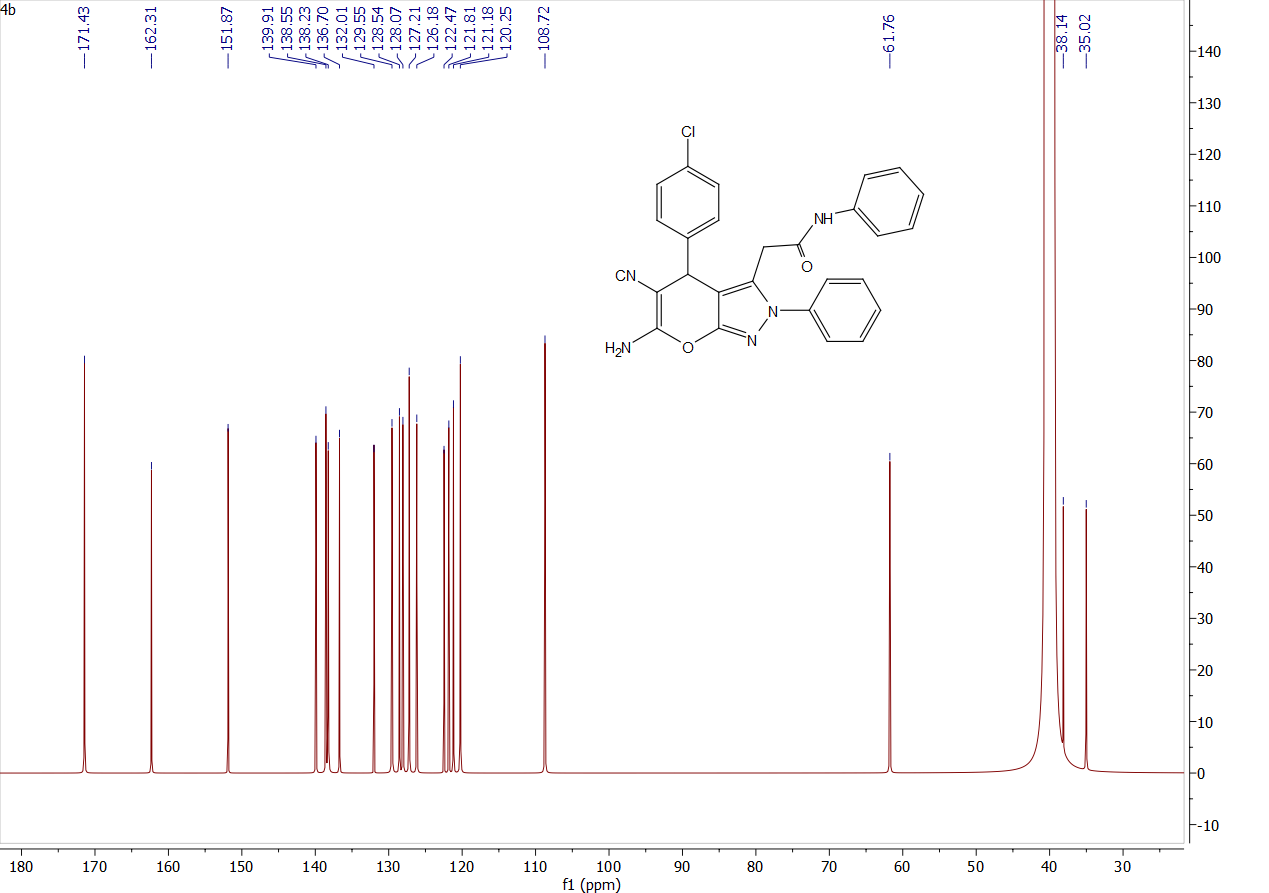


**4b**


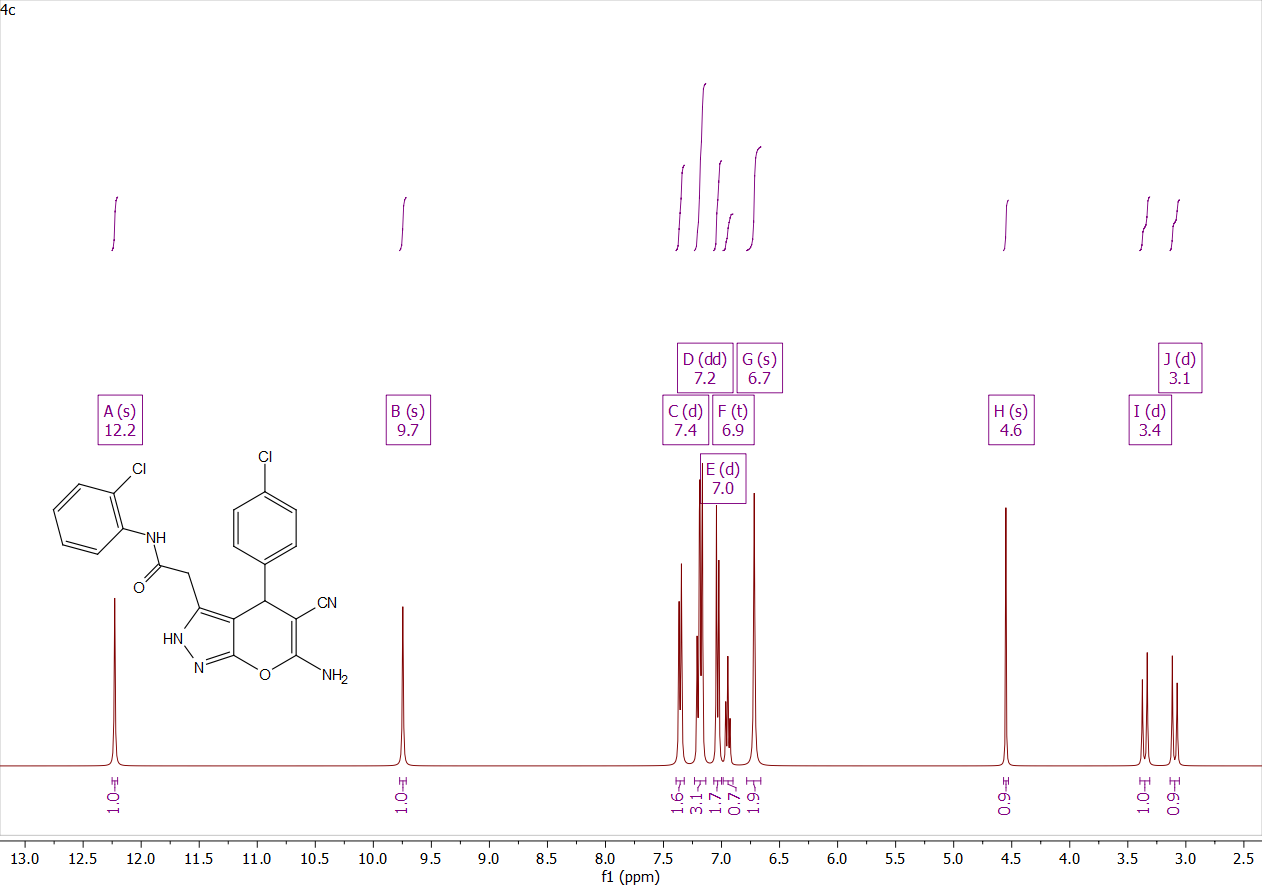


**4c**


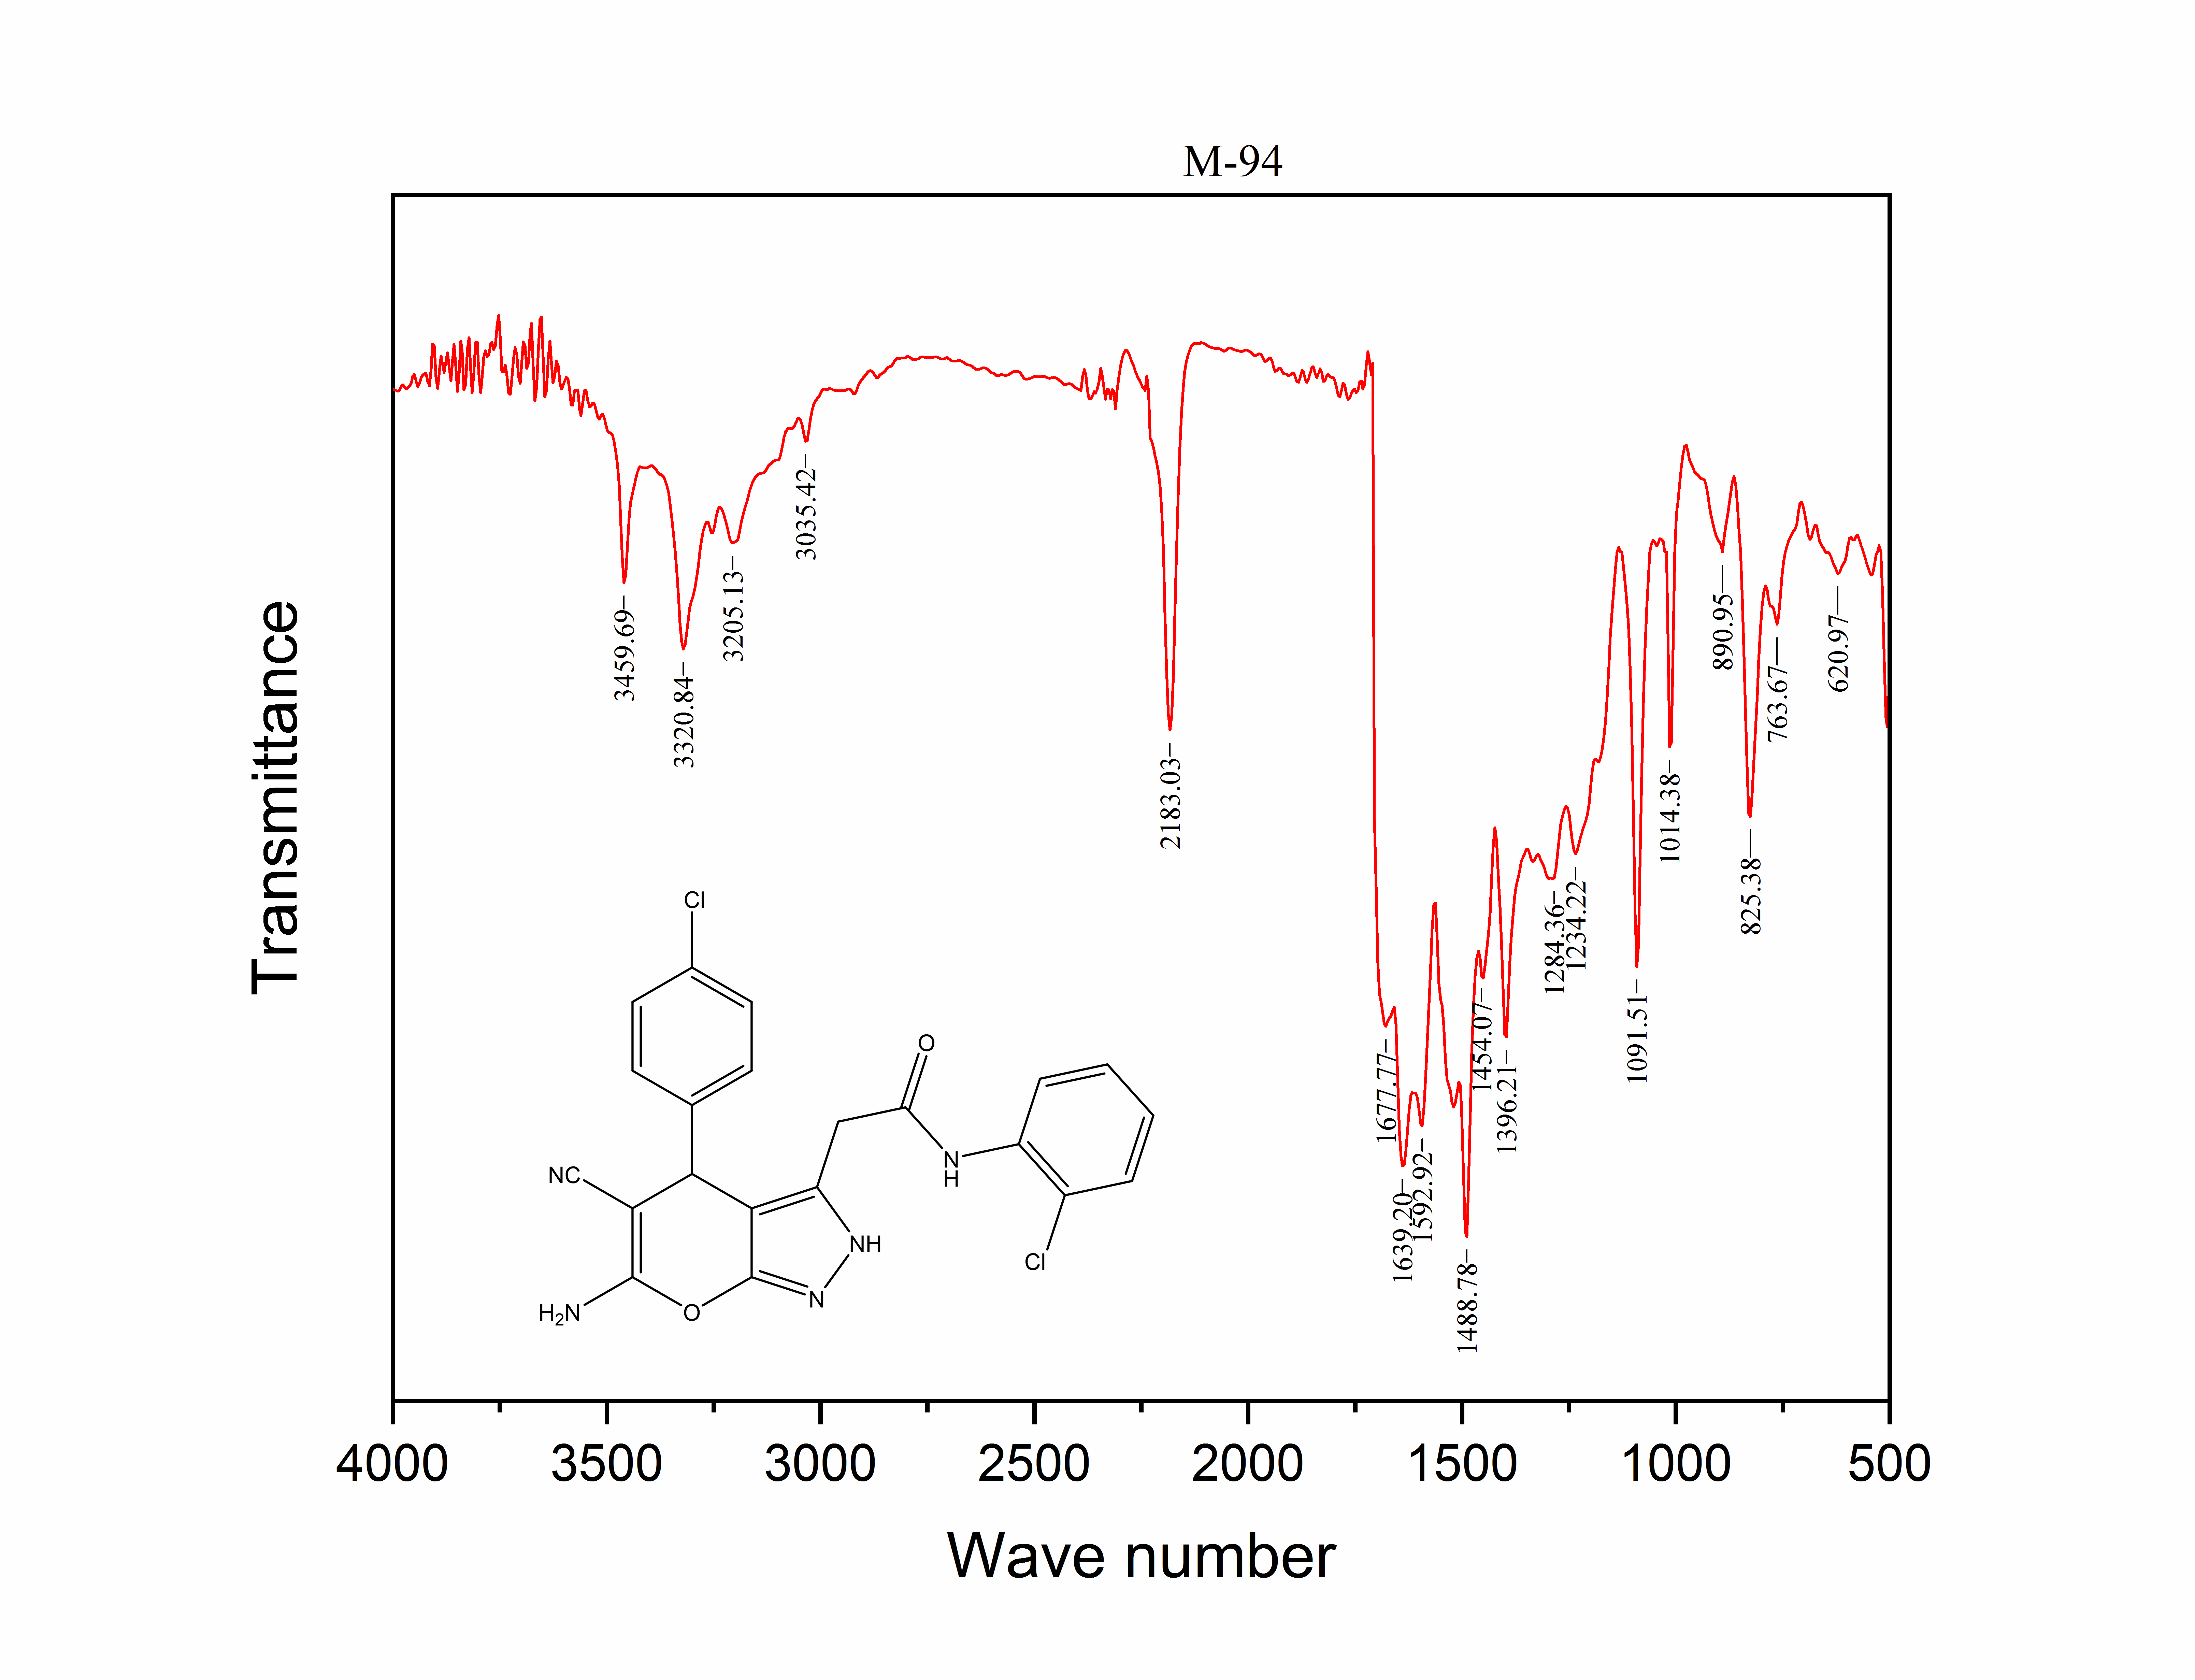


**4c**


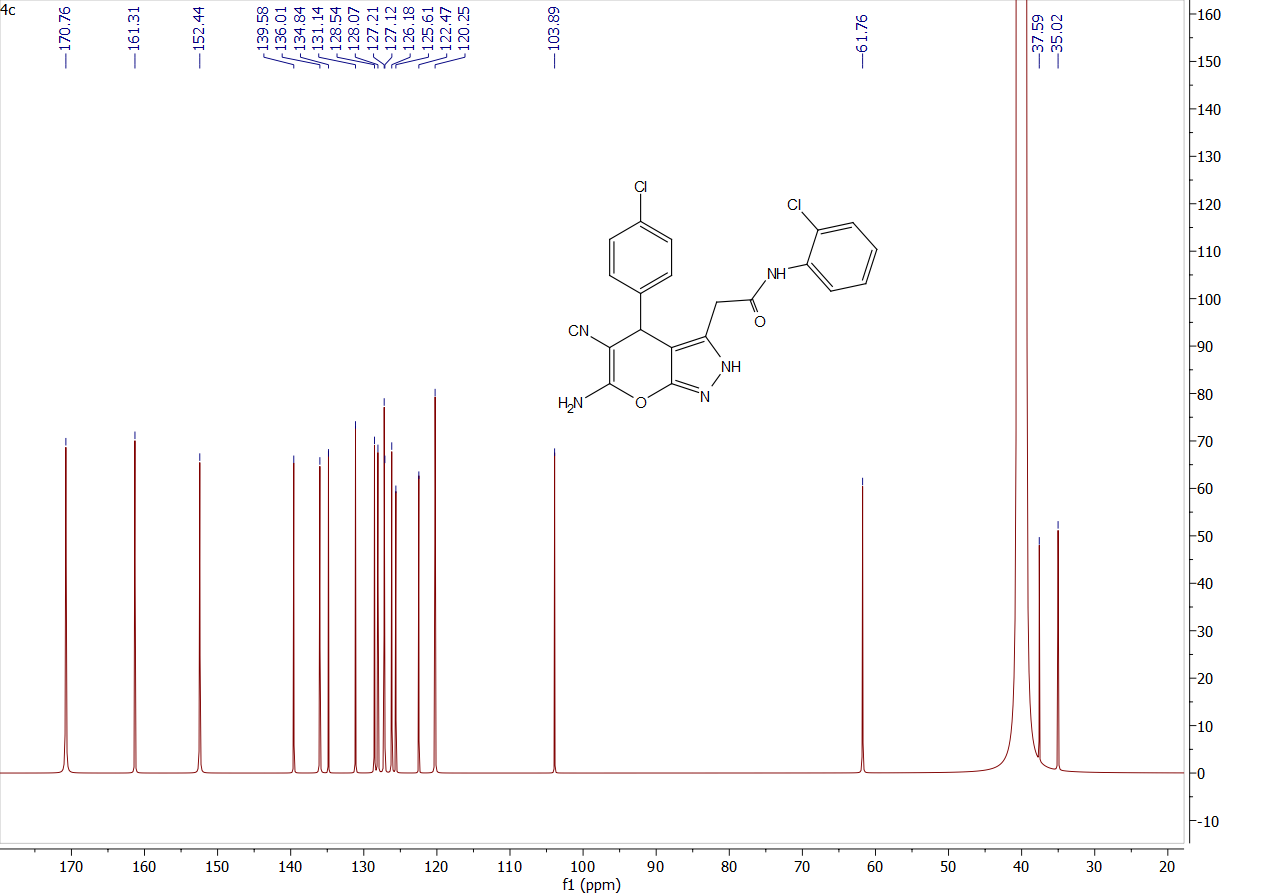


**4c**


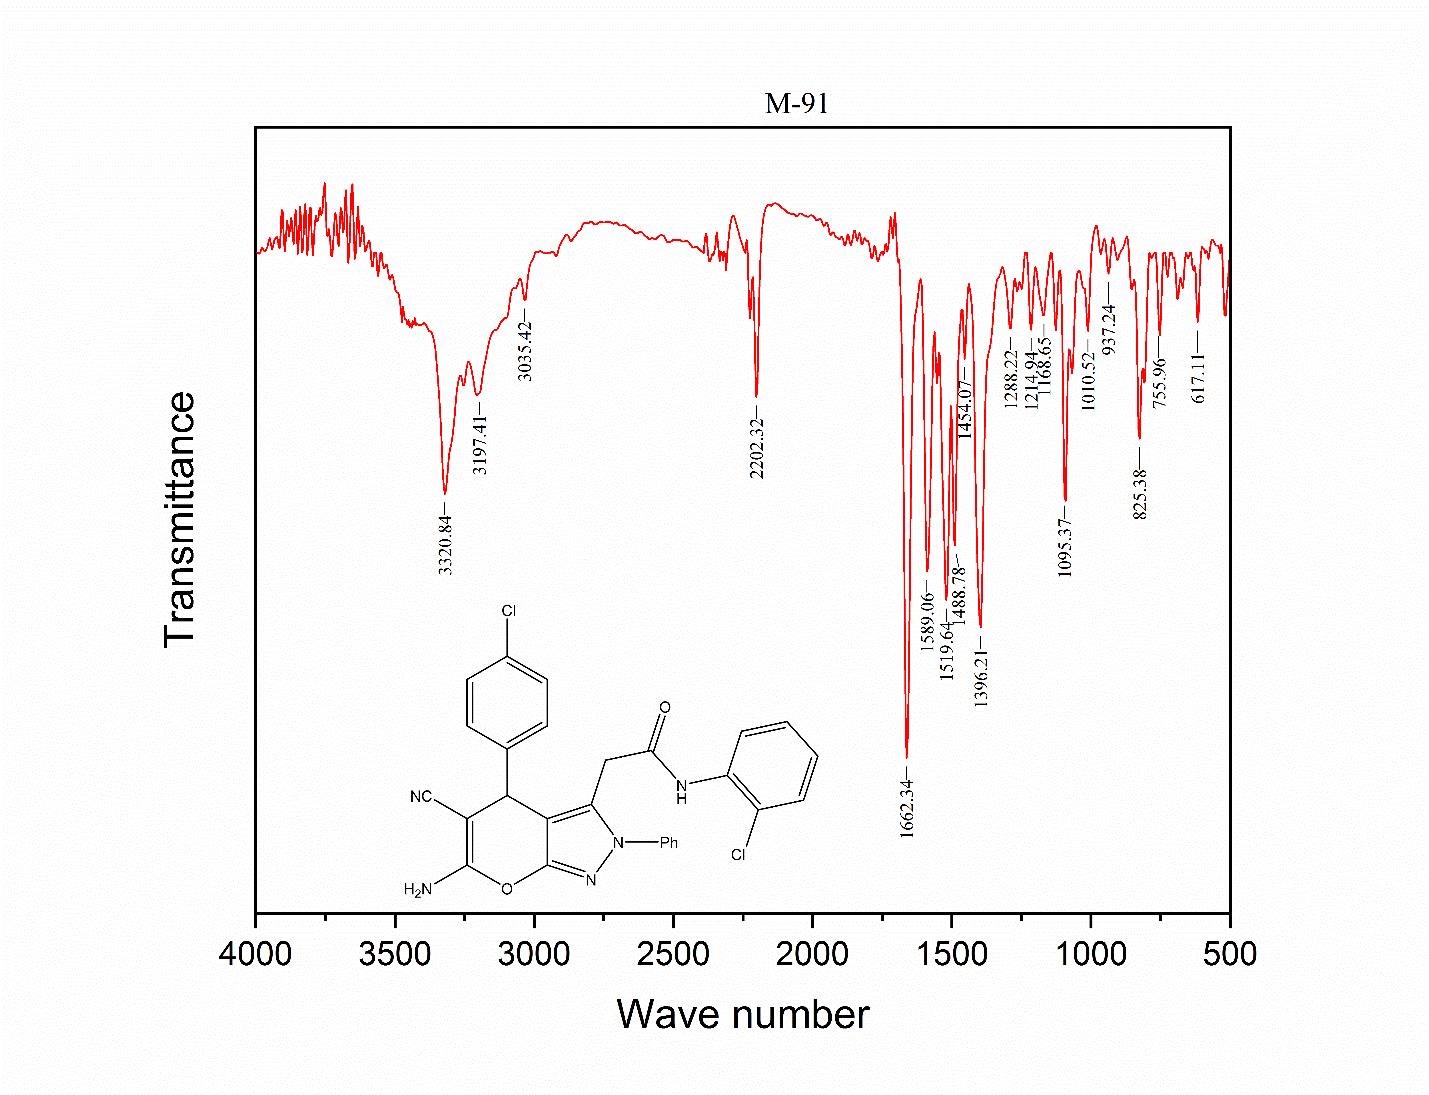


**4d**


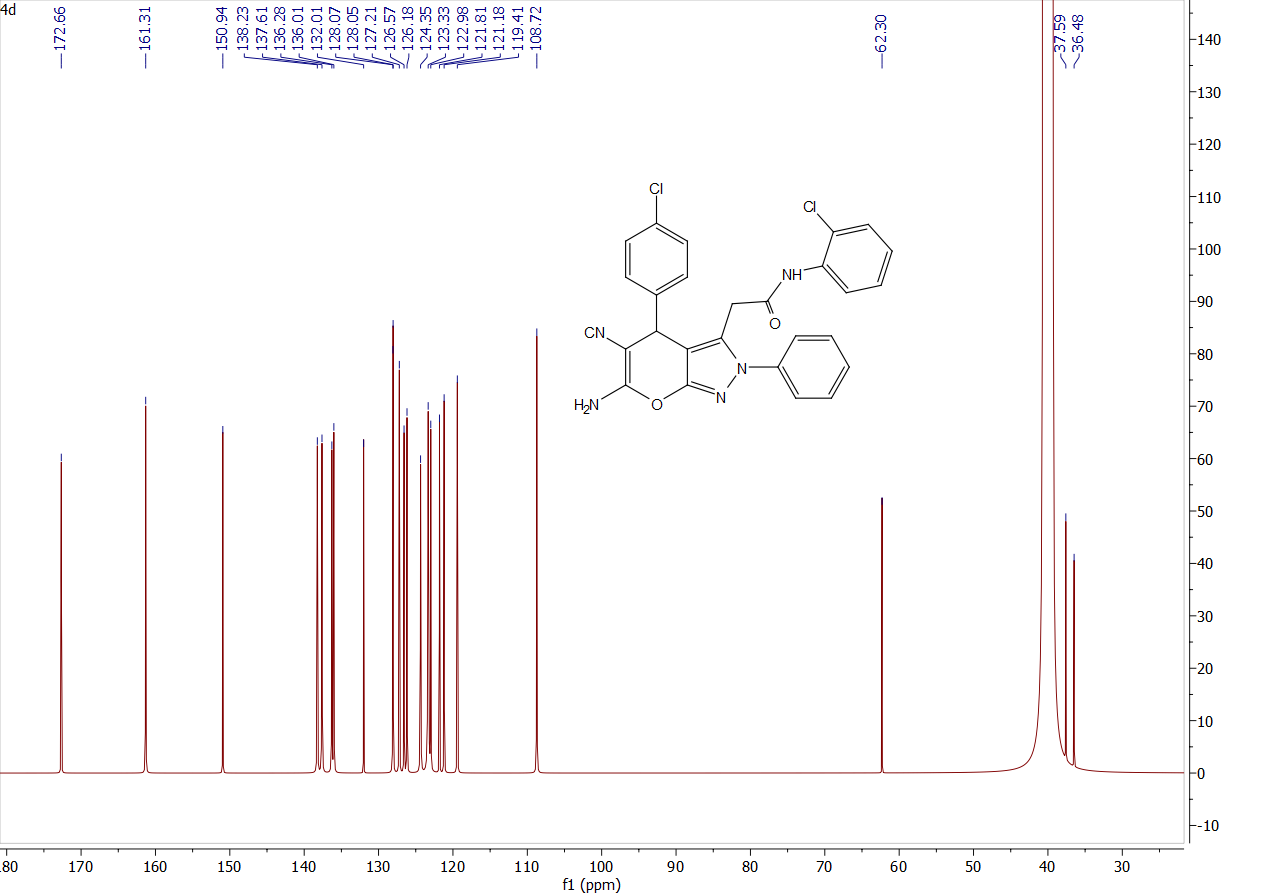


**4d**


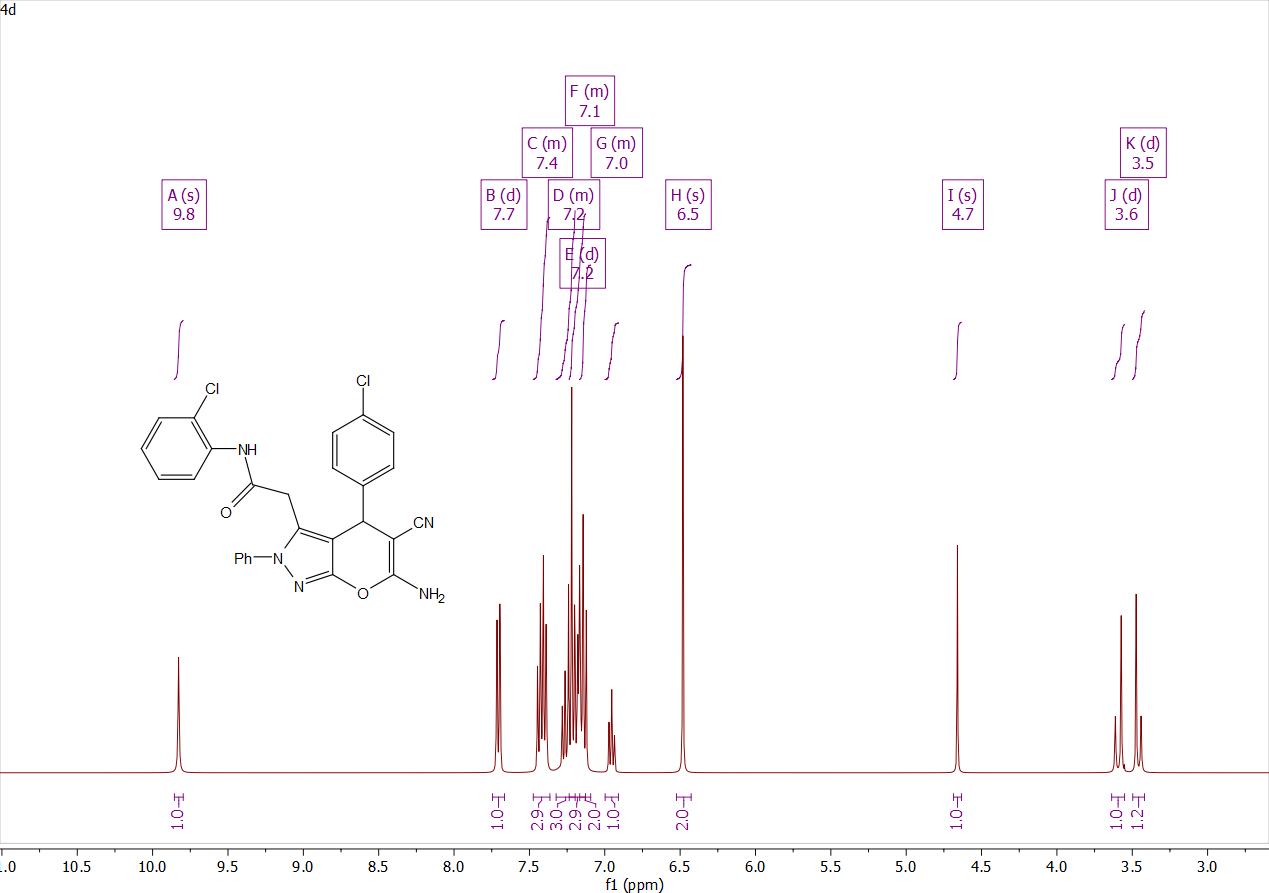


**4d**


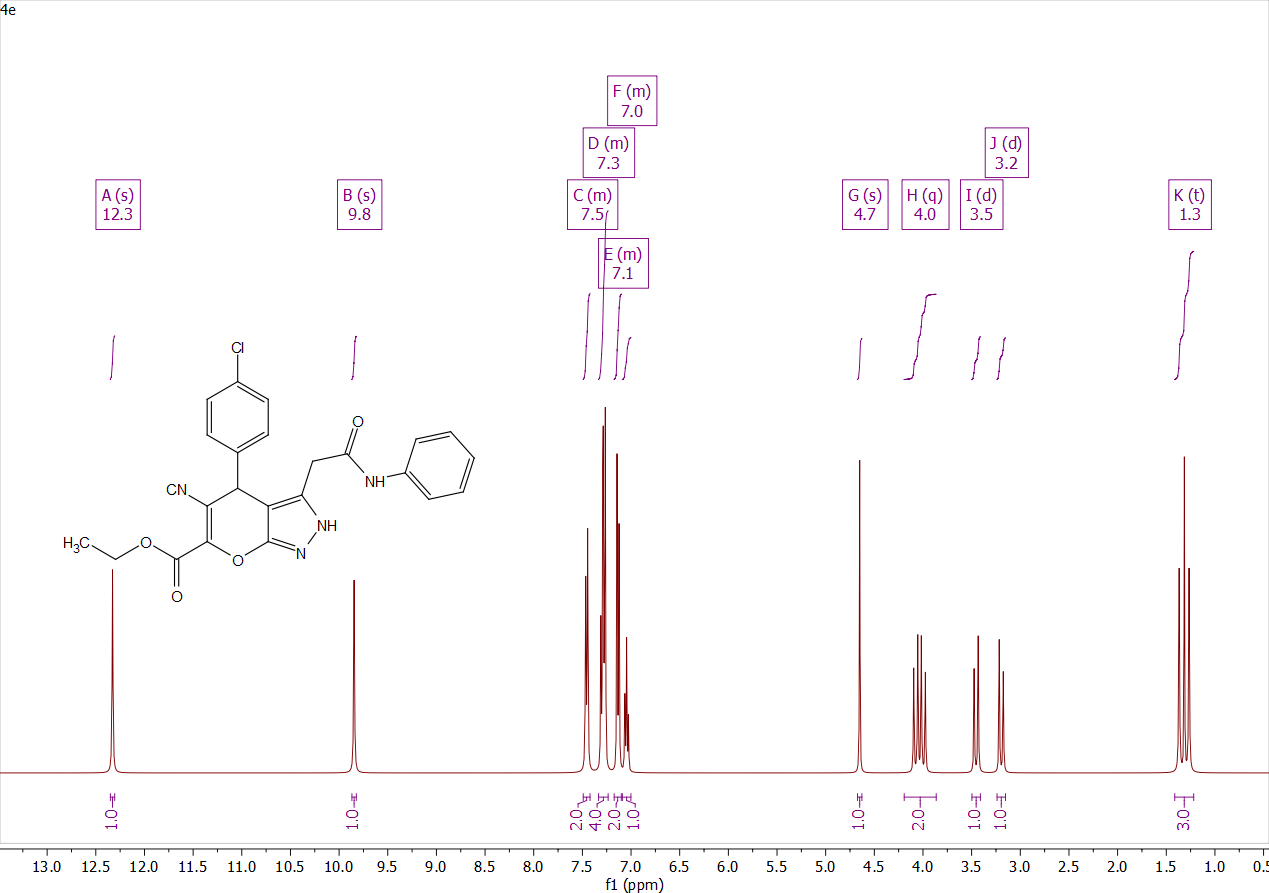


**4e**


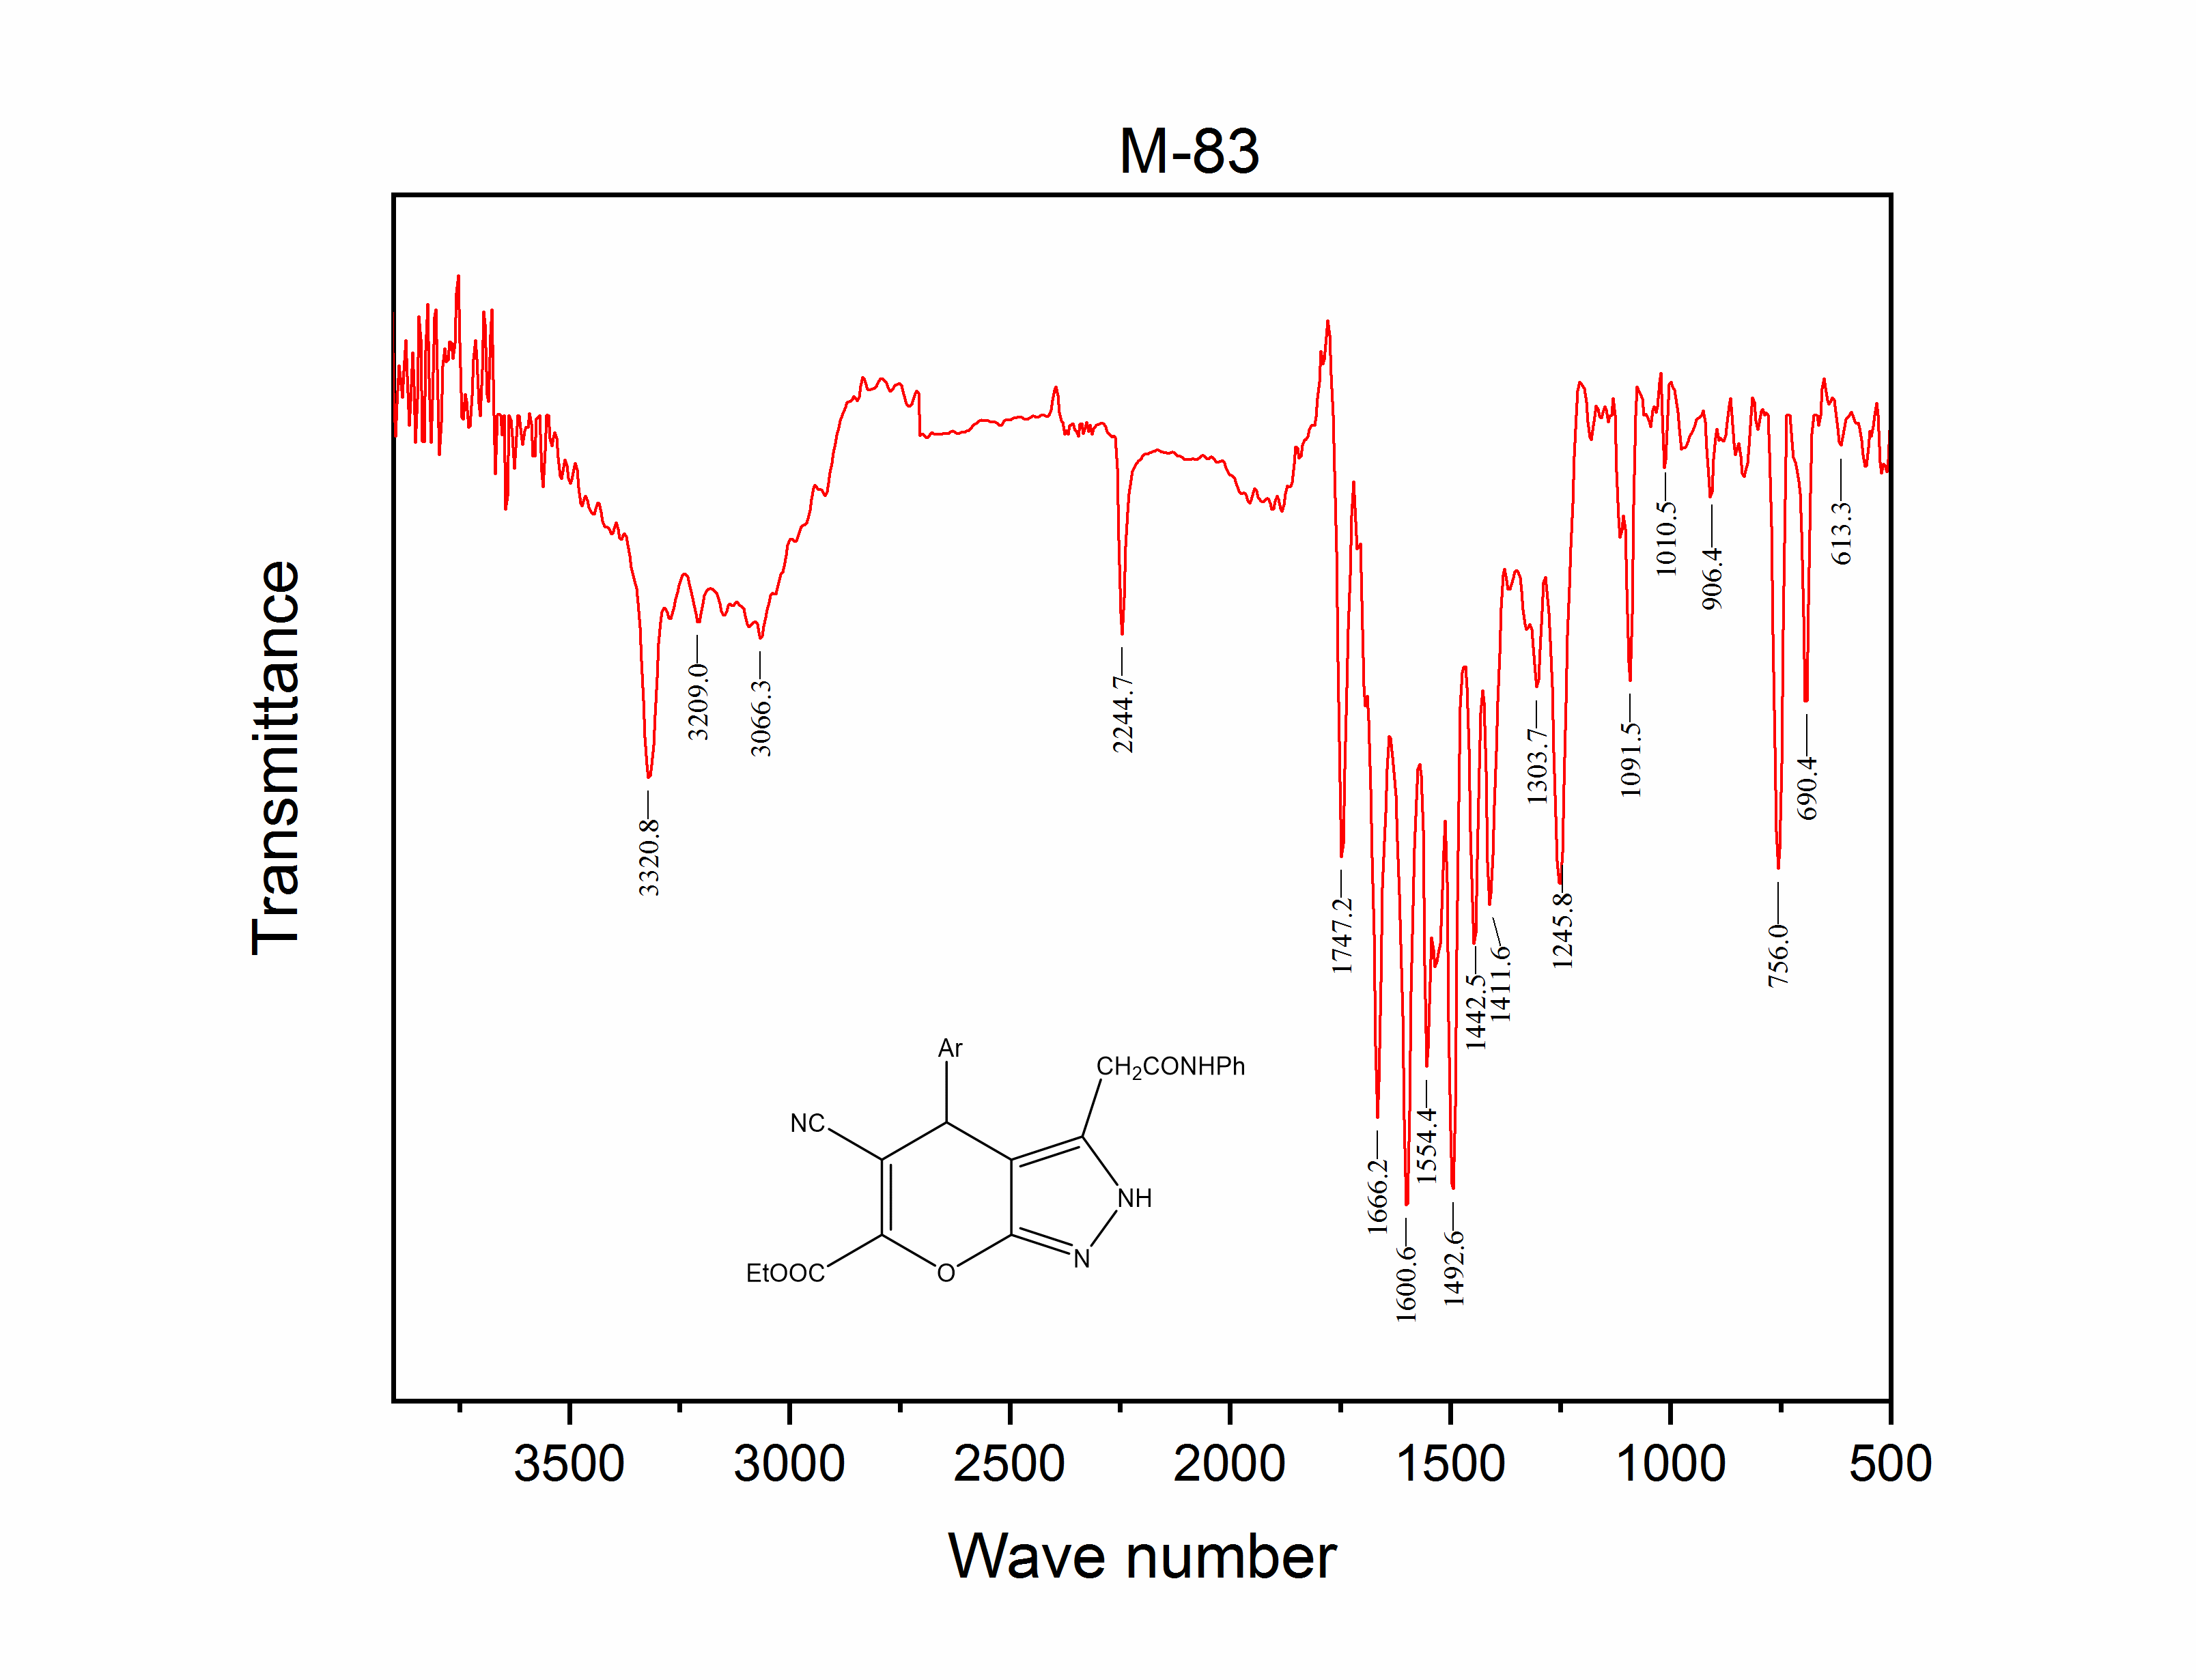


**4e**


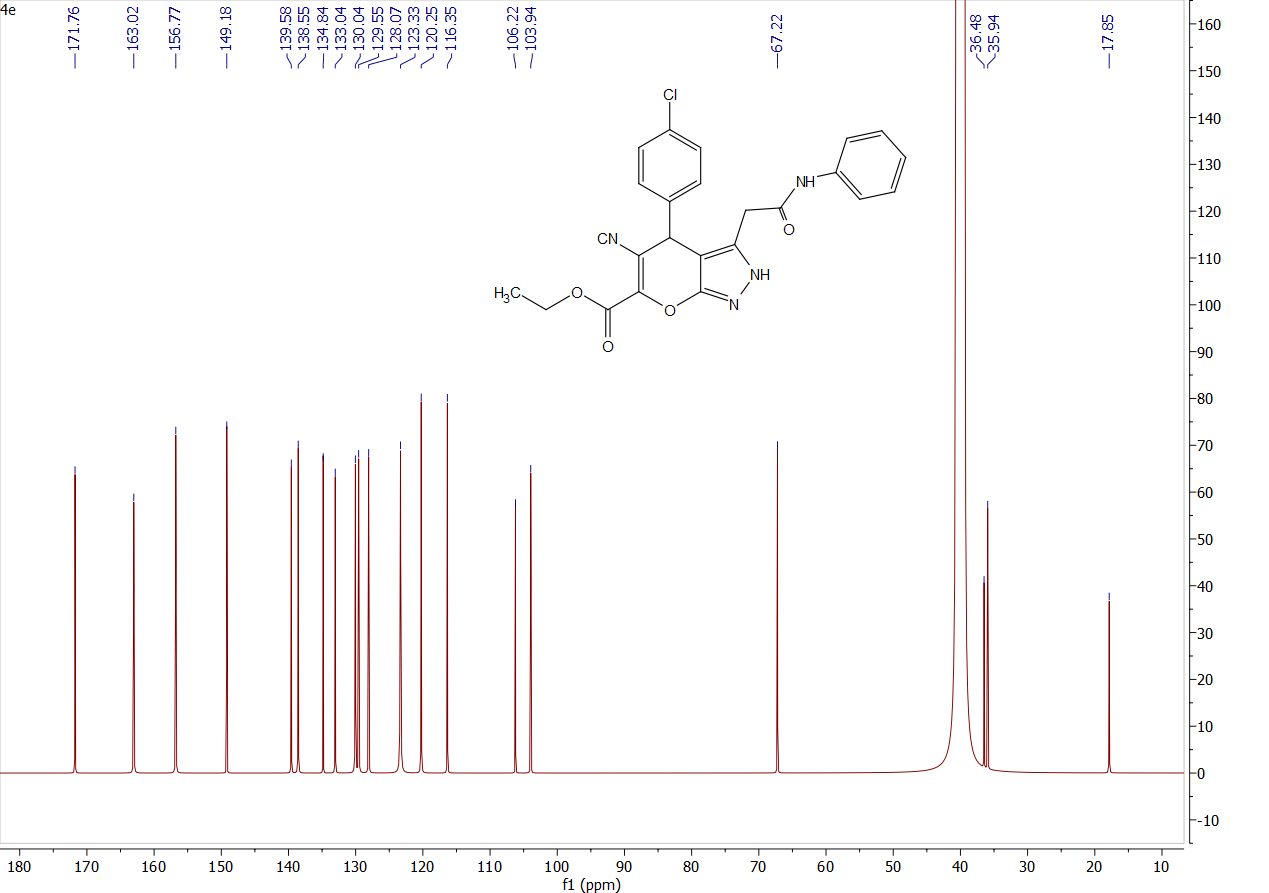



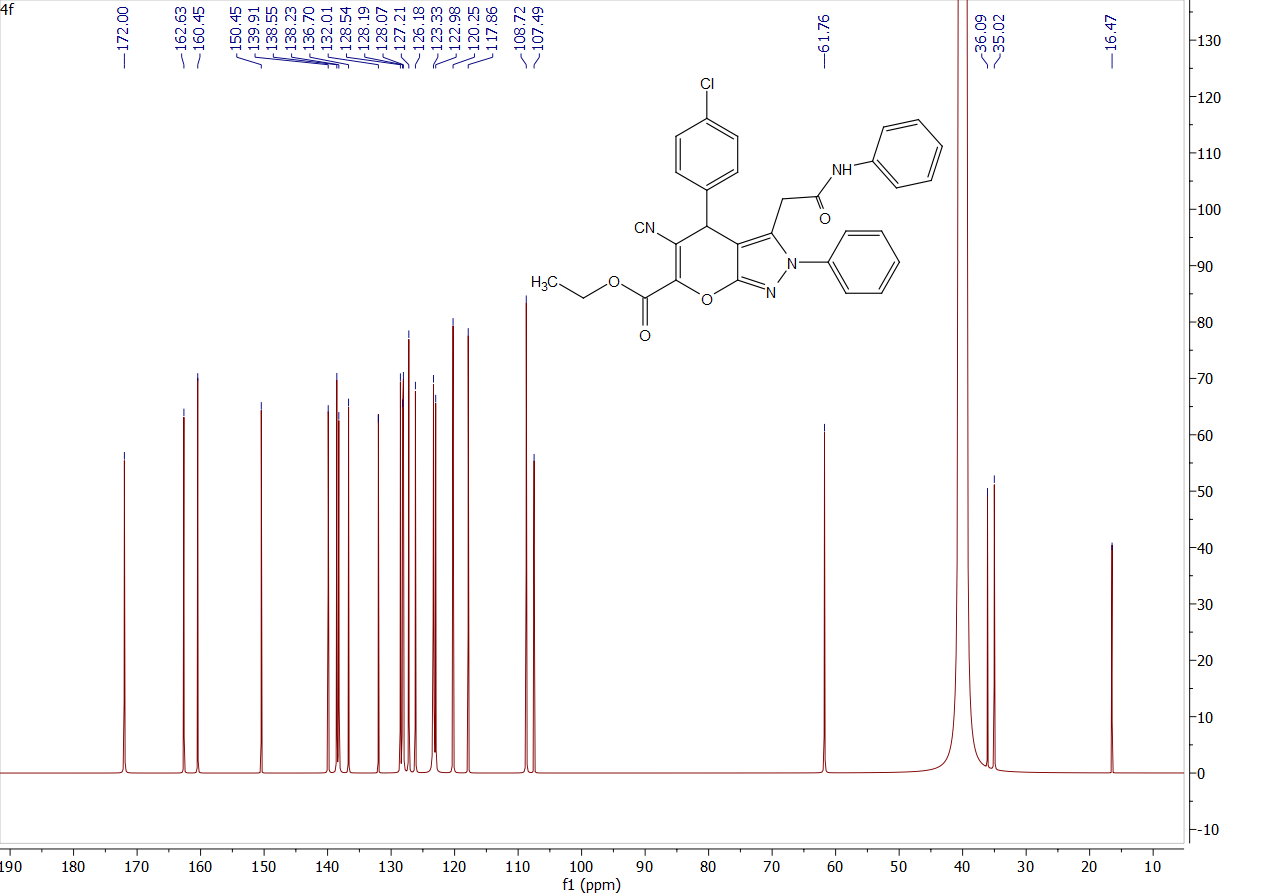


**4e**

**4f**

**4f**


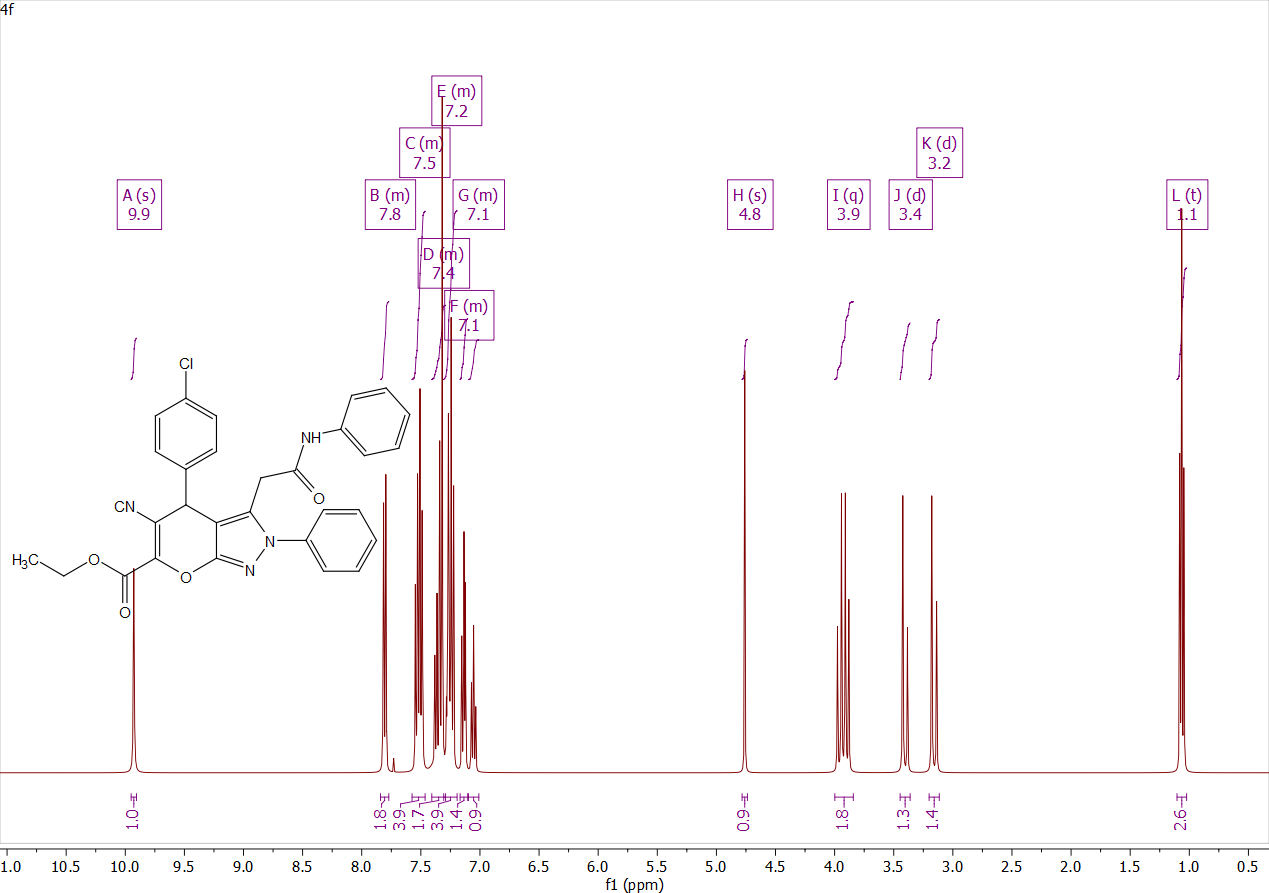


**4f**


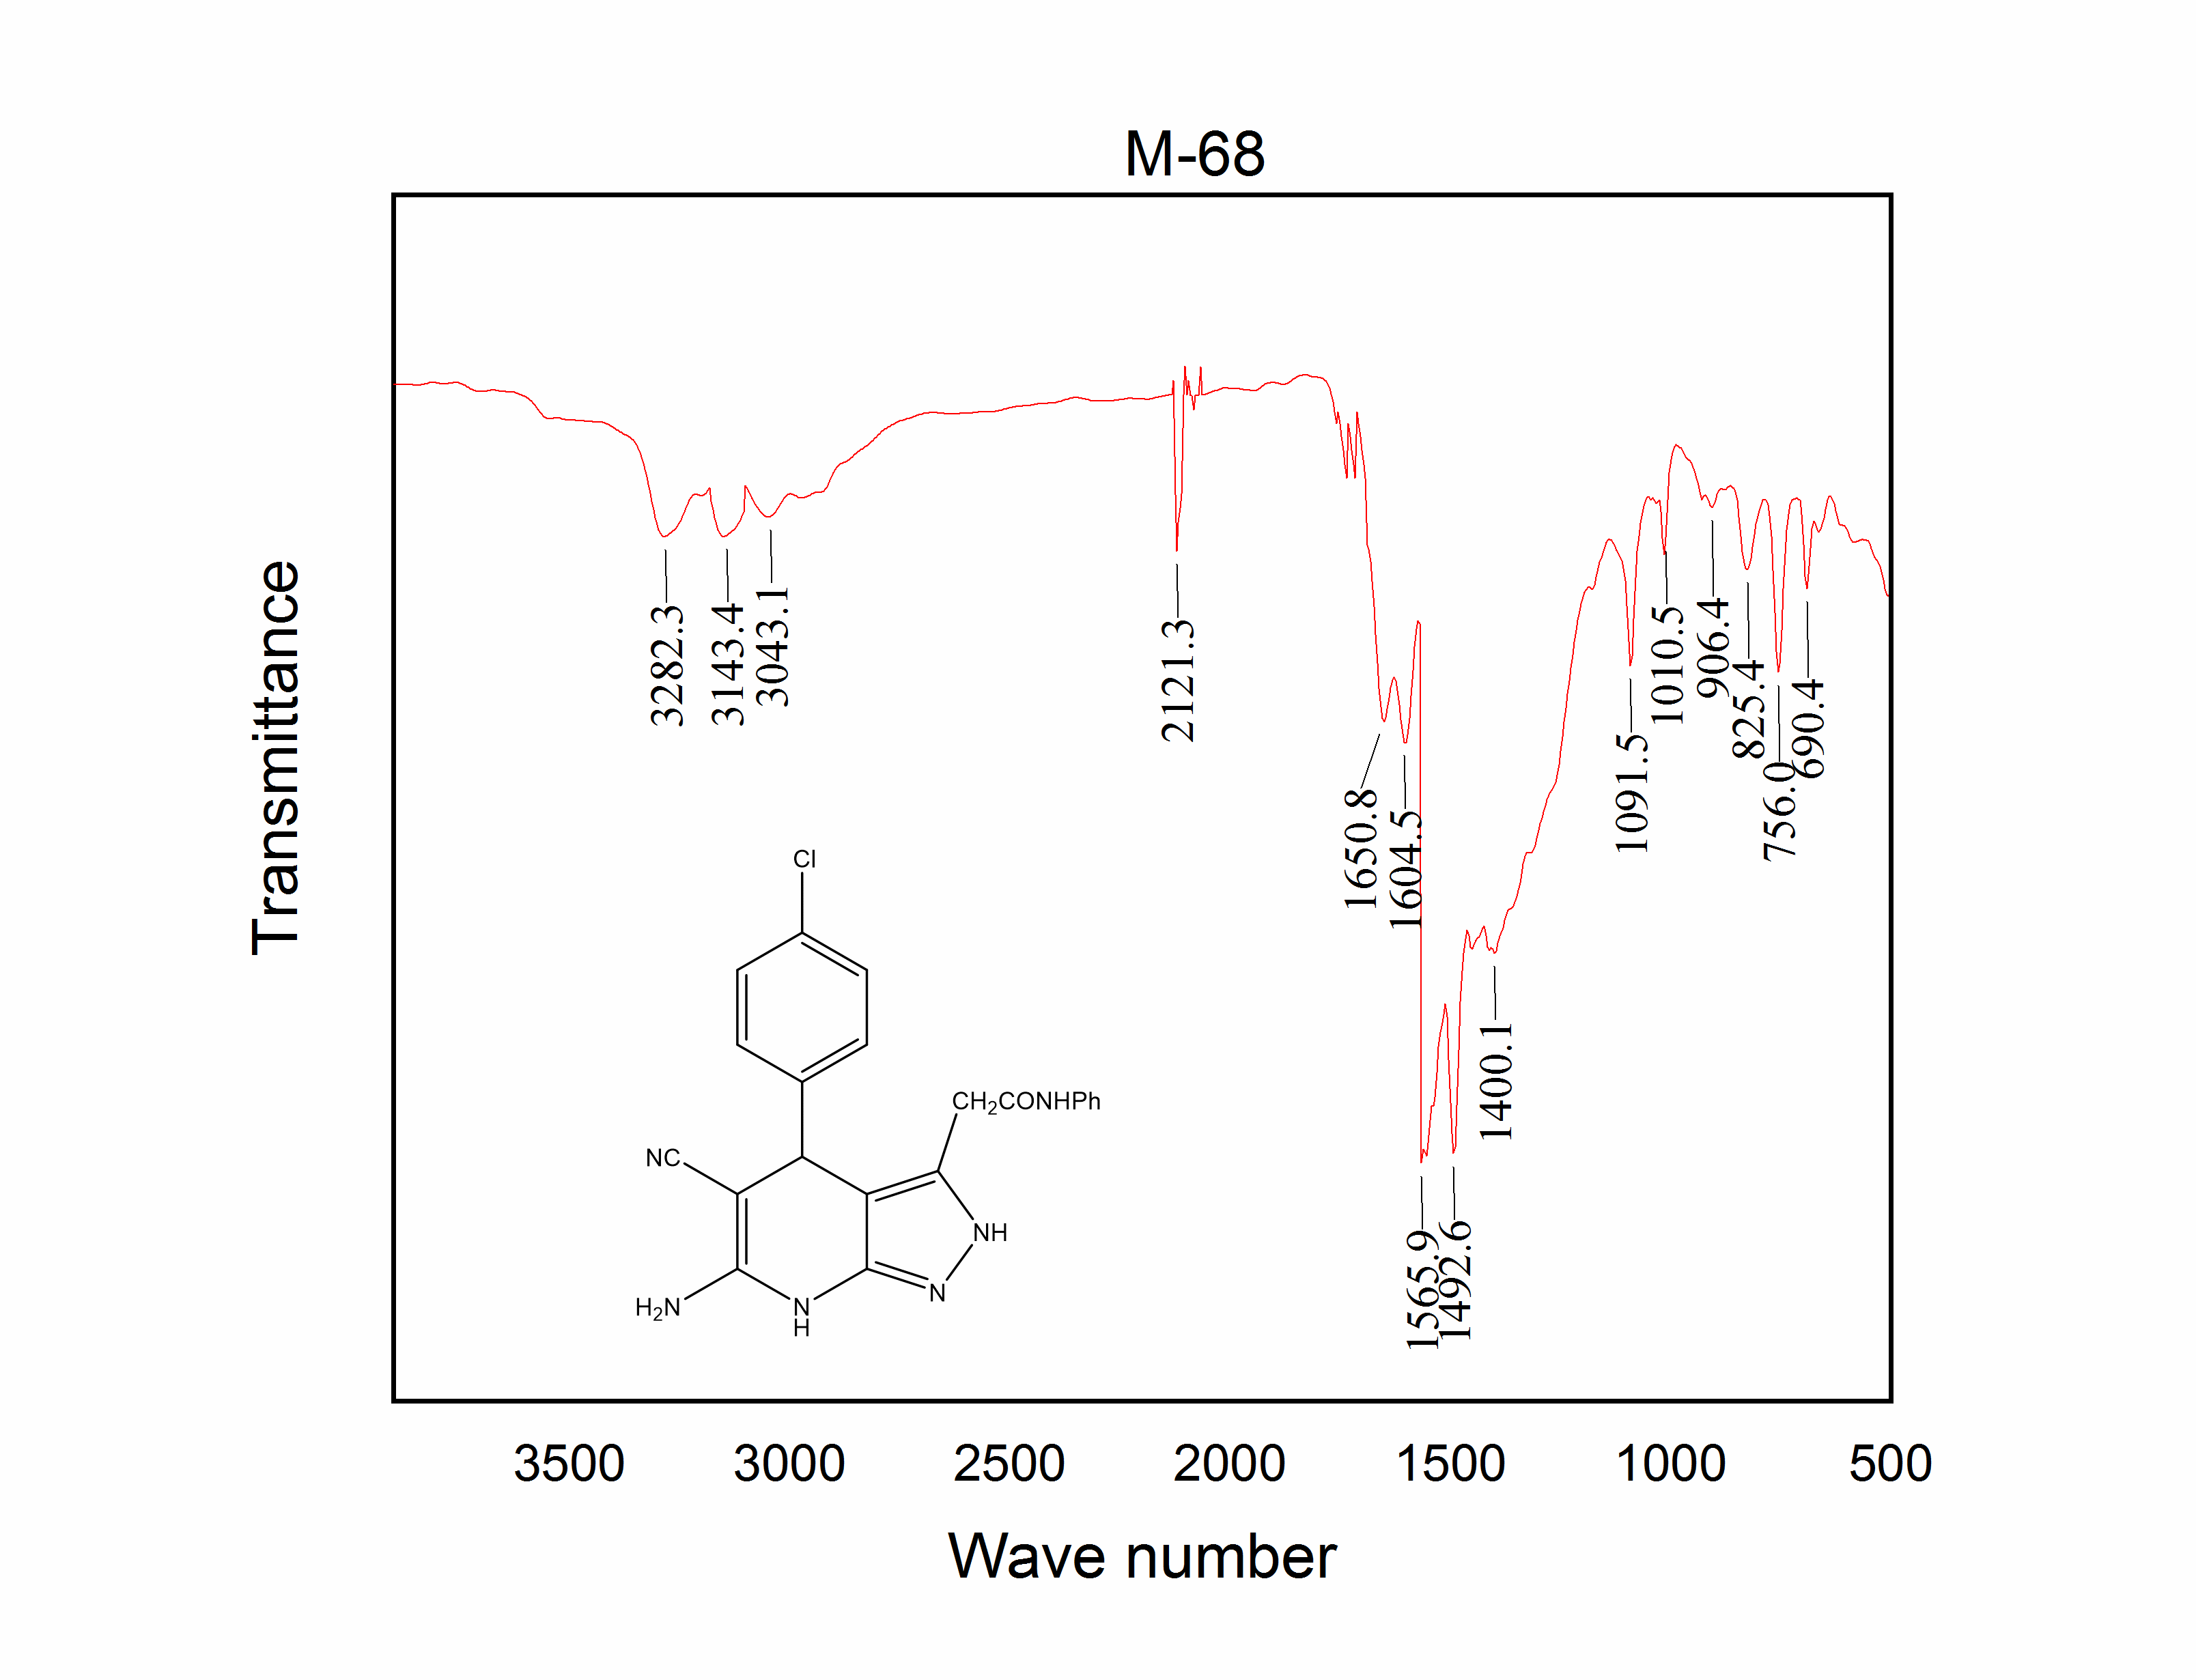


**4g**


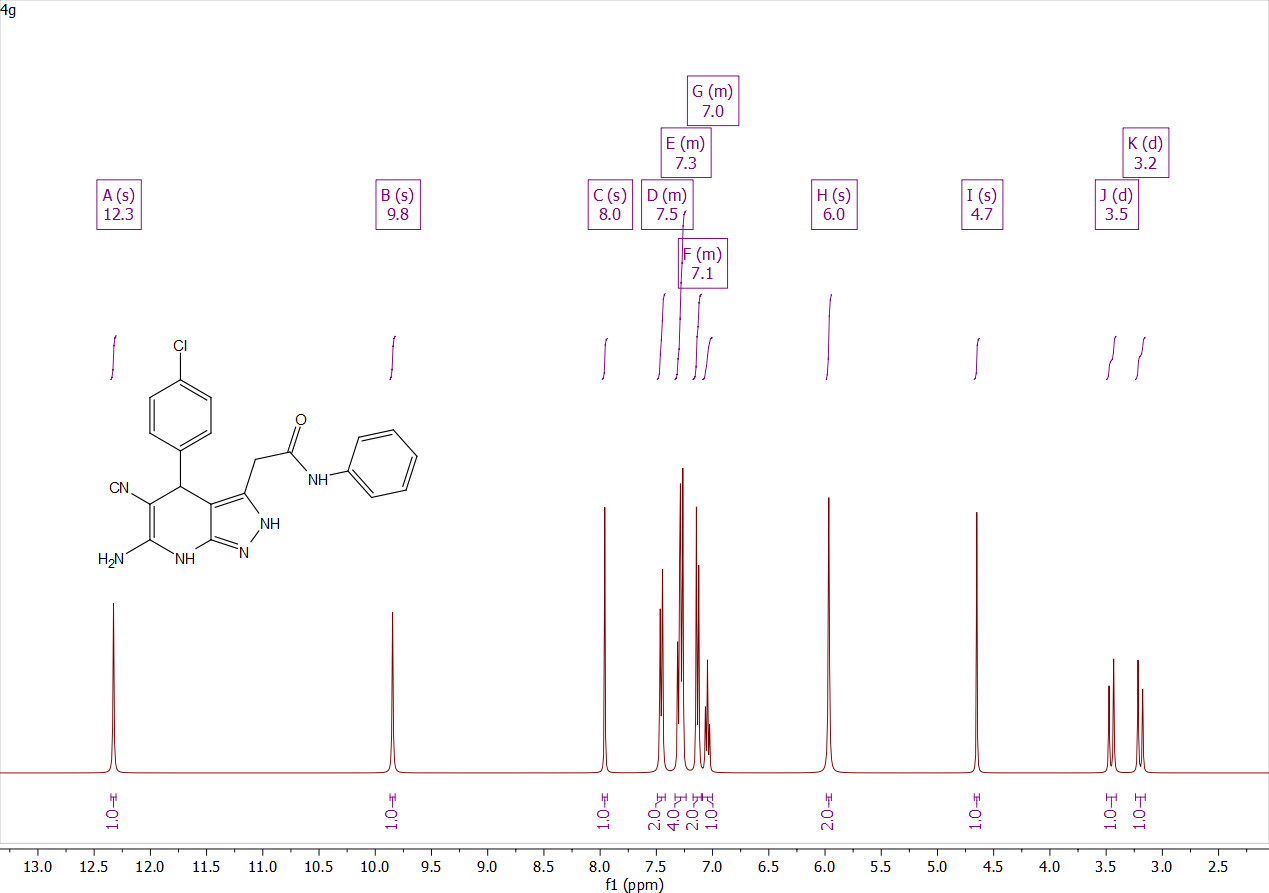


**4g**


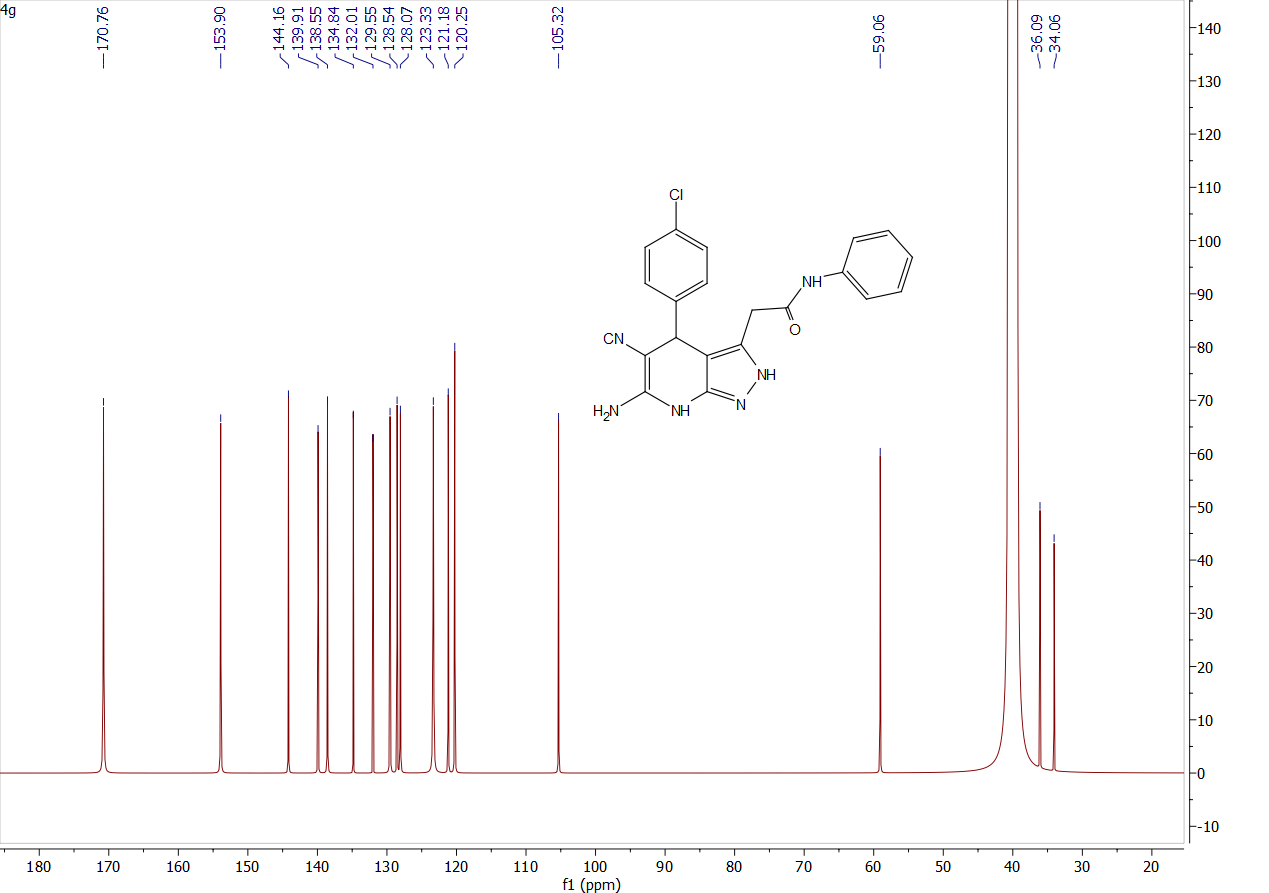


**4g**


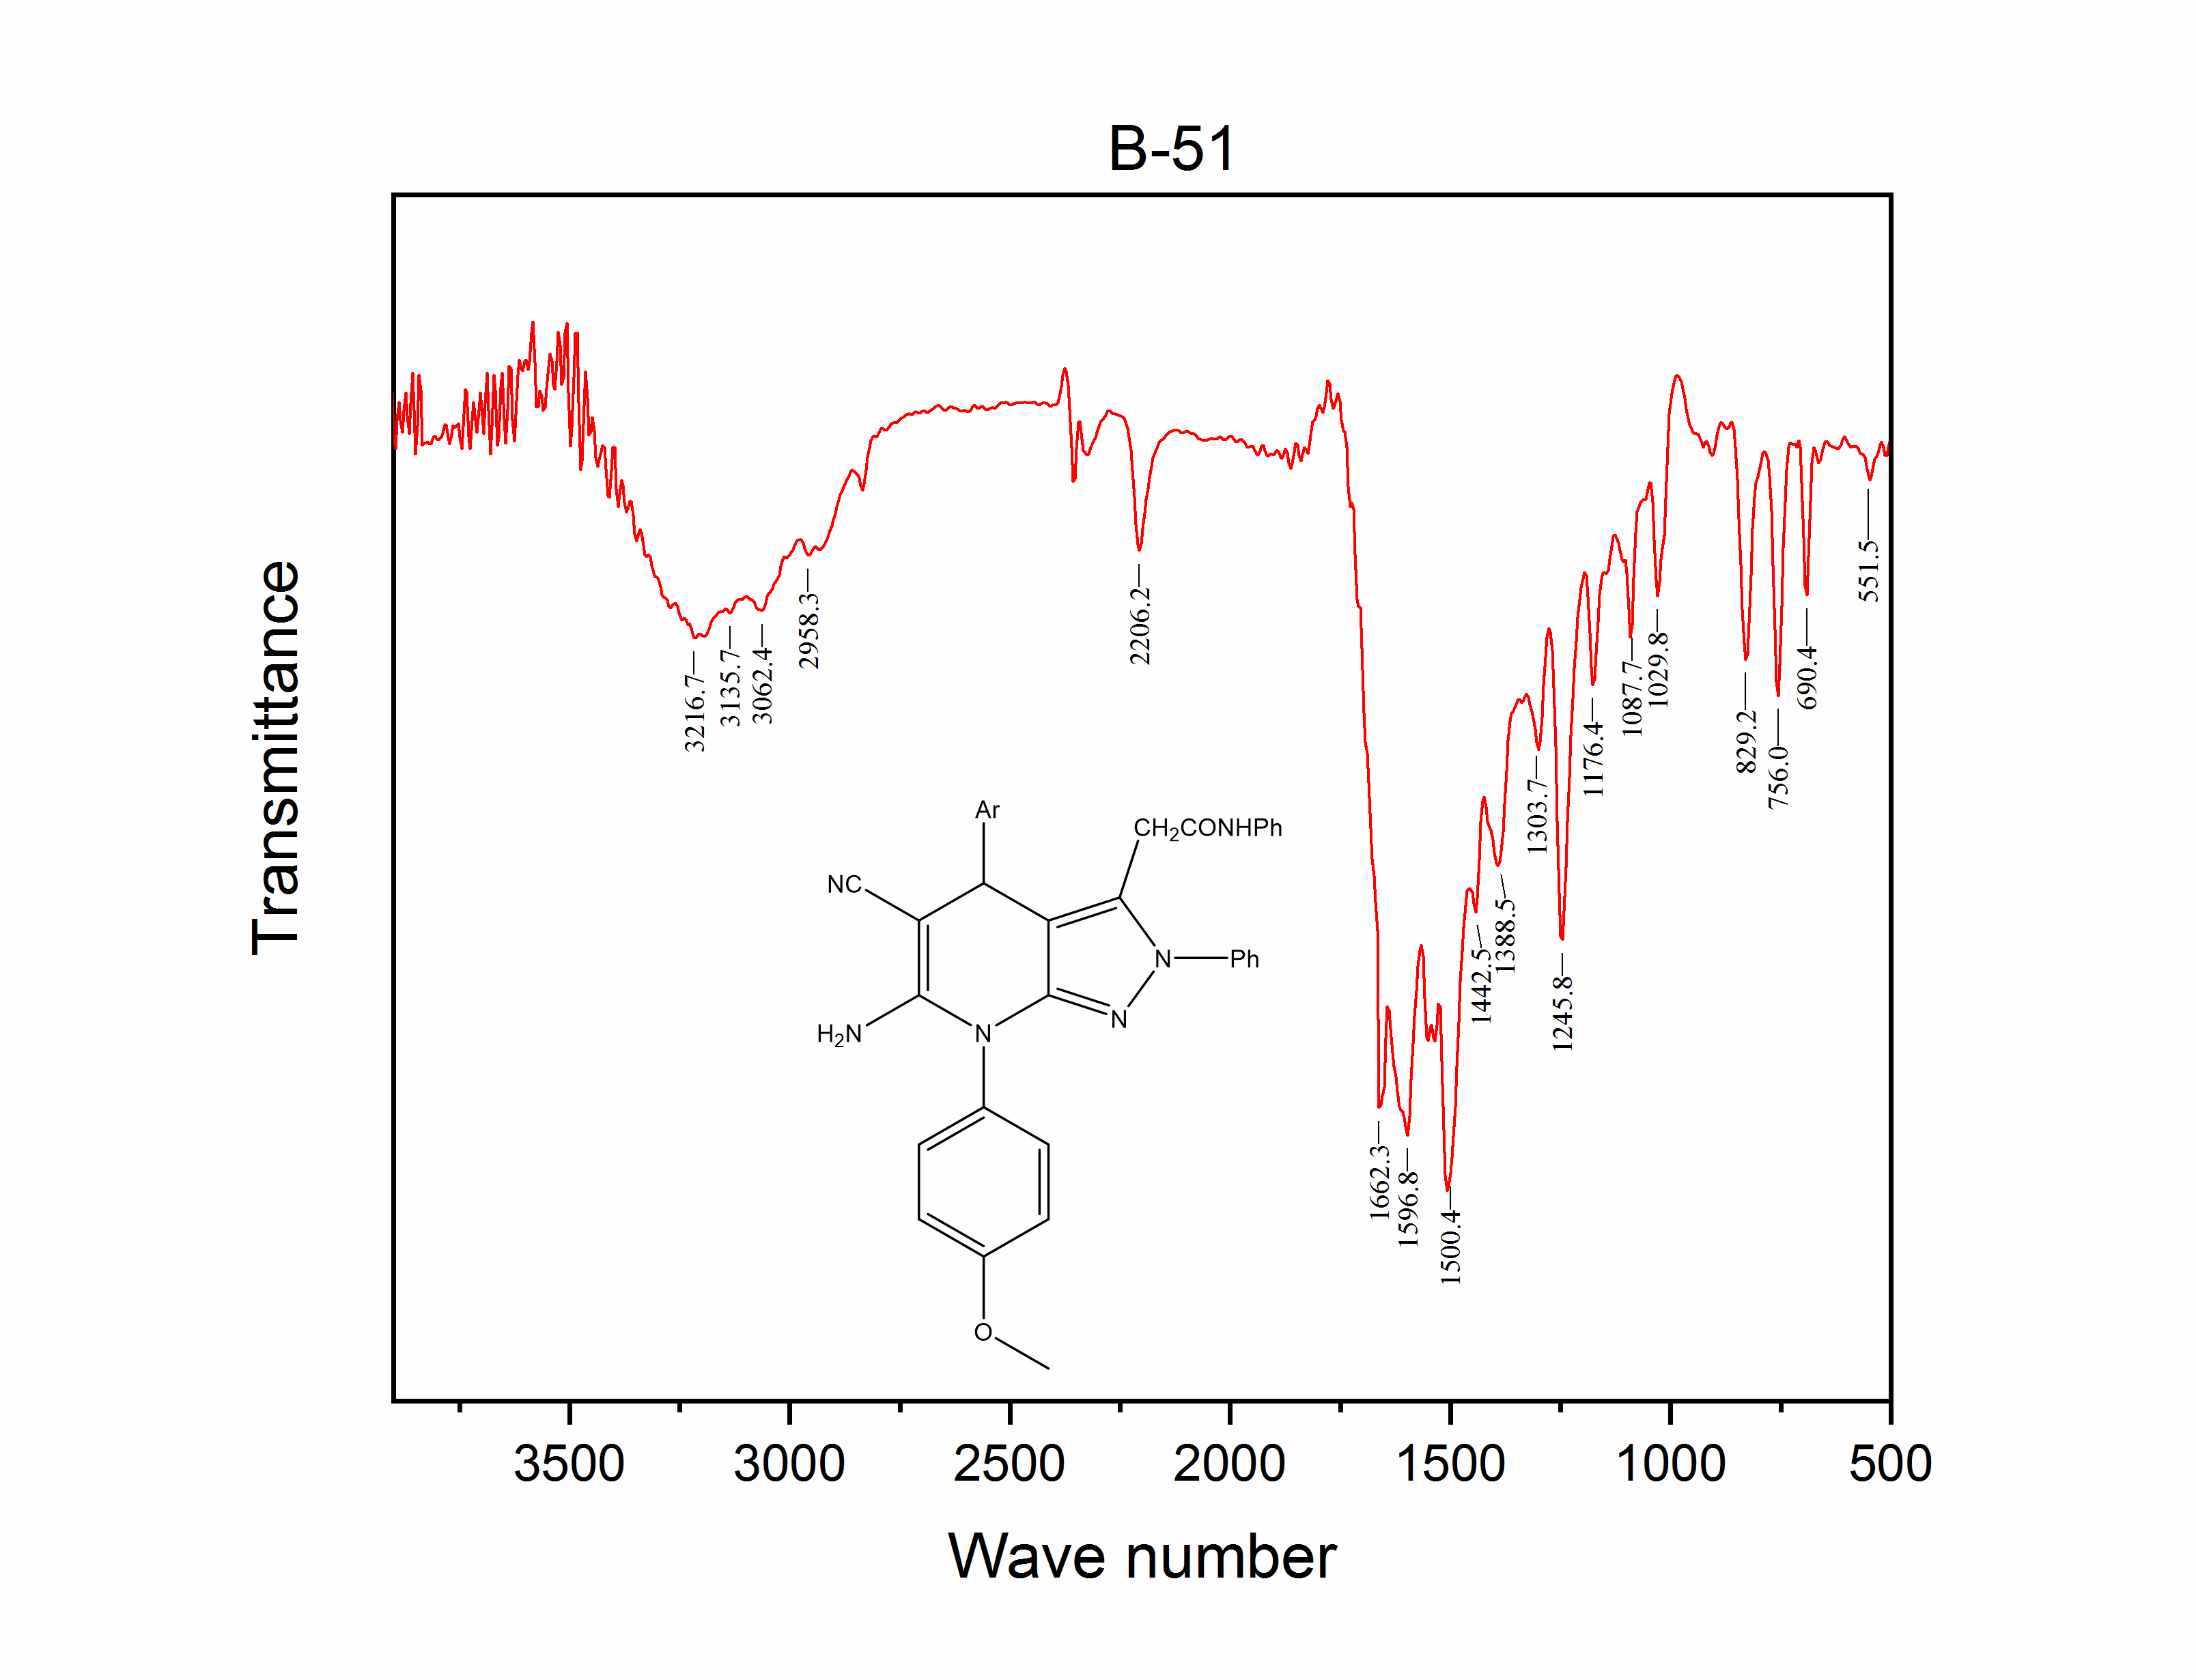


**4h**


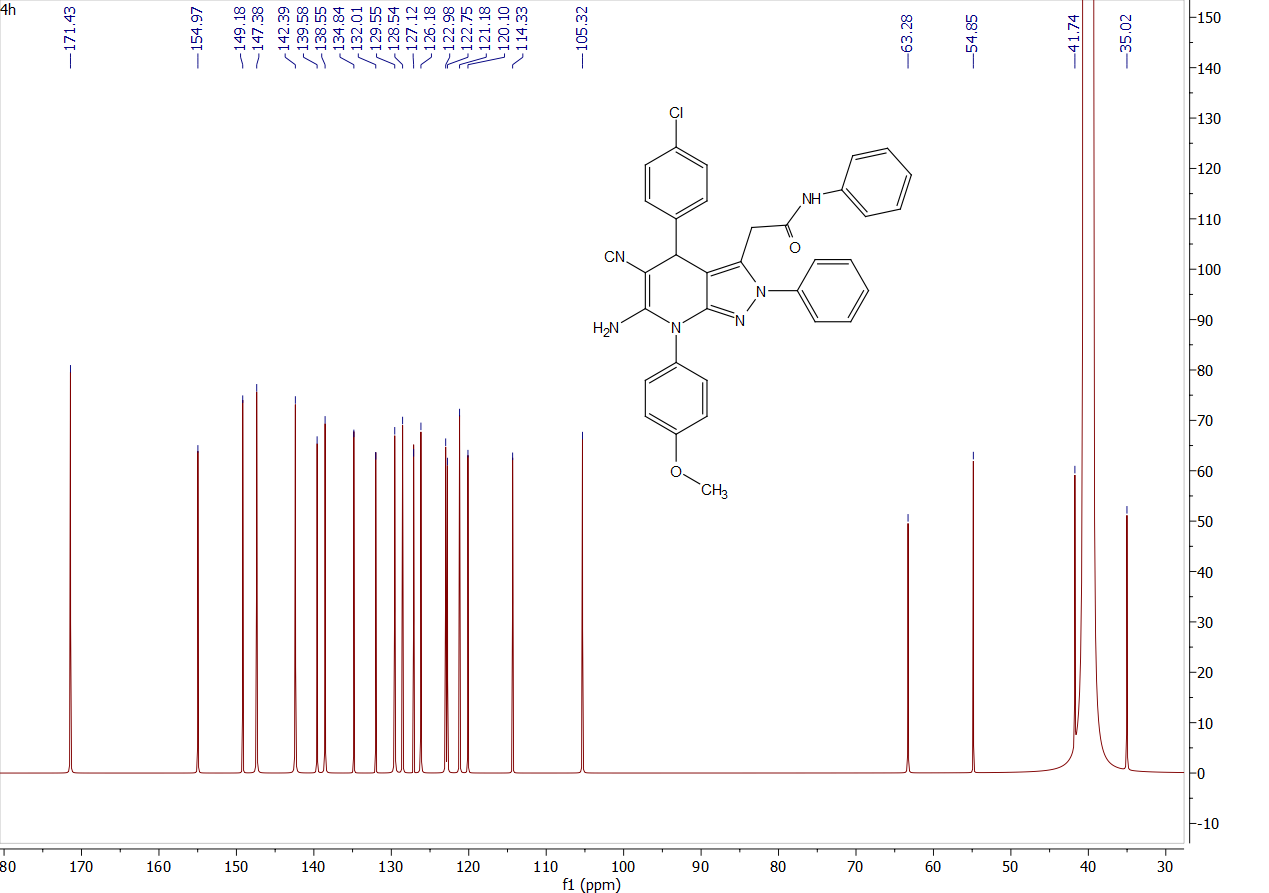


**4h**


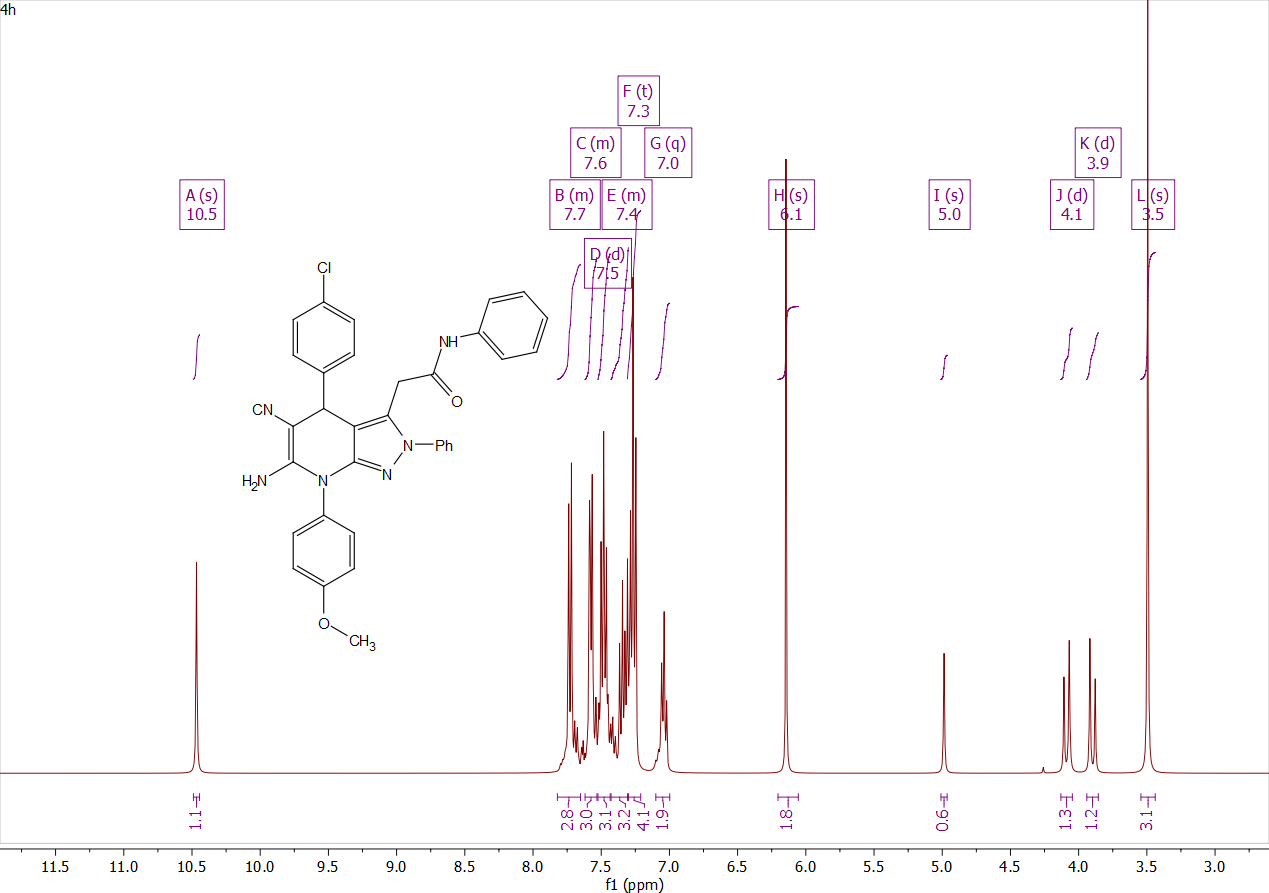


**4h**

Supplement: f1 [file 6623445.f1.zip › Supporting Data - new - 17-8.docx]
